# Supplementary material for: Organocatalytic asymmetric desymmetrization of 4,4-disubstituted cyclohexadienones via an intermolecular Diels–Alder reaction
Source: Royal Society of Chemistry journal article supplement (doi:10.1039/c5ob01760b), 2015-01-01
Supplement: c5ob01760b1.pdf [file c5ob01760b1.pdf]

**Organocatalytic asymmetric desymmetrization of  
4,4-disubstituted cyclohexadienones  
via intermolecular Diels-Alder reaction**

Ryukichi Takagi,\* Takehiko Nishi

*Department of Chemistry, Graduate School of Science, Hiroshima  
University, 1-3-1 Kagamiyama, Higashi-Hiroshima 739-8526, Japan  
rtakagi@hiroshima-u.ac.jp*

Table of Contents

|                                                                                                                                                        |     |
|--------------------------------------------------------------------------------------------------------------------------------------------------------|-----|
| General Method.....                                                                                                                                    | S2  |
| Preparation of chiral phosphoric acid <b>2</b> .....                                                                                                   | S2  |
| Preparation of dienones <b>1a-c</b> .....                                                                                                              | S2  |
| Preparation of dienone <b>1d</b> .....                                                                                                                 | S2  |
| Preparation of dienone <b>1e</b> .....                                                                                                                 | S3  |
| Preparation of dienones <b>1f-i</b> .....                                                                                                              | S4  |
| Oxidation of allylic position of <b>S4</b> .....                                                                                                       | S5  |
| Preparation of racemic Diels-Alder adduct <b>3</b> .....                                                                                               | S7  |
| Computational data in Figure 1.....                                                                                                                    | S7  |
| DFT study on transition state of thermal and (MeO) <sub>2</sub> P(O)OH-catalyzed<br>Diels-Alder reaction of dienone <b>1</b> with cyclopentadiene..... | S23 |
| References.....                                                                                                                                        | S28 |
| NMR Spectra.....                                                                                                                                       | S30 |
| HPLC Spectra.....                                                                                                                                      | S51 |

## General Method

All reactions involving air- and moisture-sensitive reagents were carried out under N<sub>2</sub>. CH<sub>2</sub>Cl<sub>2</sub> and benzene were distilled over CaH<sub>2</sub> before use. Tetrahydrofuran (THF) was distilled after refluxing over Na-benzophenone before use. Merck silica gel 60F<sub>254</sub> TLC aluminum sheets were used for routine monitoring of reactions. Column chromatography was performed on Kanto Chemical Silica Gel 60N (spherical, neutral 63-210 mm).

Internal references for <sup>1</sup>H NMR spectra were 0.0 ppm (Me<sub>4</sub>Si) for CDCl<sub>3</sub>. Chemical shifts for <sup>13</sup>C NMR spectra were referenced to CDCl<sub>3</sub> (77.0 ppm). MS were recorded under electron ionization (EI; 70eV). High-resolution mass spectral (HRMS) data were recorded with a LTQ Orbitrap. Enantioselectivities were determined by high performance liquid chromatography (HPLC) analysis on Chiralpak IA, IC and IC-3 columns. Optical rotations were measured on a digital polarimeter with a 0.1 dm cell at r.t.

## Preparation of chiral phosphoric acid 2

Chiral phosphoric acids **2a-g**<sup>1</sup> and H<sub>8</sub>-**2g**<sup>2</sup> were prepared according to literature procedures.

## Preparation of dienones 1a-c

Dienones **1a-c** were prepared according to literature procedure.<sup>3</sup>

## Preparation of dienone 1d

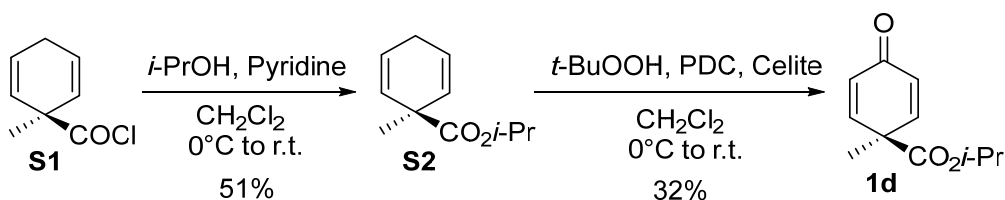

To a mixture of *i*-PrOH (0.85 mL, 11.0 mmol) and pyridine (2.90 mL, 35.9 mmol) in CH<sub>2</sub>Cl<sub>2</sub> (3.0 mL) was added a solution of **S1**<sup>4</sup> (670 mg, 4.29 mmol) in CH<sub>2</sub>Cl<sub>2</sub> (0.6 mL) at 0 °C. The reaction mixture was warmed to room temperature and stirred for 3 h. After addition of water, the mixture was extracted with CH<sub>2</sub>Cl<sub>2</sub>. The organic layer was washed with 1 N HCl, water and brine, dried over Na<sub>2</sub>SO<sub>4</sub>, and concentrated in vacuo. The crude product was purified by column chromatography on silica gel (hexane/EtOAc = 10 : 1)

to give **S2** (391 mg, 51%) as a colorless oil.  $^1\text{H}$  NMR (500 MHz,  $\text{CDCl}_3$ )  $\delta$  5.83-5.67 (m, 4 H), 4.97 (septet,  $J = 6.3$  Hz, 1 H), 2.66-2.62 (m, 2 H), 1.31 (s, 3 H), 1.22 (d,  $J = 6.3$  Hz, 6 H); HRMS (EI)  $m/z$  calcd for  $\text{C}_{11}\text{H}_{16}\text{O}_2$  [ $\text{M}^+$ ] 180.1150, found 180.1155.

To a mixture of **S2** (291 mg, 1.62 mmol), pyridinium dichromate (PDC) (107 mg, 0.29 mmol) and Celite (300 mg) in  $\text{CH}_2\text{Cl}_2$  (10.8 mL) was added *t*-BuOOH (70 wt% in  $\text{H}_2\text{O}$ , 0.75 mL, 5.48 mmol) at 0 °C. The reaction mixture was stirred at 0 °C for 4 h, and passed through a pad of Celite. The organic layer was washed with sat.  $\text{Na}_2\text{S}_2\text{O}_3$ , water, and brine, dried over  $\text{MgSO}_4$ , and concentrated in vacuo. The crude product was purified by column chromatography on silica gel (hexane/EtOAc = 7 : 1) to give **1d** (99.2 mg, 32%) as a yellow oil.  $^1\text{H}$  NMR (500 MHz,  $\text{CDCl}_3$ )  $\delta$  7.04 (d,  $J = 10.3$  Hz, 2 H), 6.29 (d,  $J = 10.3$  Hz, 2 H), 5.03 (septet,  $J = 6.2$  Hz, 1 H), 1.55 (s, 3 H), 1.24 (d,  $J = 6.2$  Hz, 6 H);  $^{13}\text{C}$  NMR (125 MHz,  $\text{CDCl}_3$ )  $\delta$  184.98, 170.06, 149.18 (x2), 128.85 (x2), 69.90, 48.23, 24.78, 21.48 (x2); HRMS (EI)  $m/z$  calcd for  $\text{C}_{11}\text{H}_{14}\text{O}_3$  [ $\text{M}^+$ ] 194.0943, found 194.0947.

### Preparation of dienone 1e

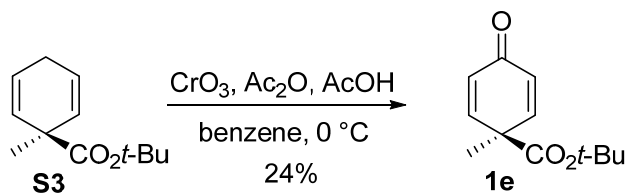

A solution of **S3**<sup>5</sup> (10.4 g, 53.5 mmol),  $\text{Ac}_2\text{O}$  (50 mL), and  $\text{AcOH}$  (100 mL) was cooled to 0 °C and diluted with benzene (100 mL).  $\text{CrO}_3$  (26.9 g, 269.3 mmol) was added to the reaction mixture. After stirring at 0 °C to r.t. for overnight, the reaction mixture was diluted with EtOAc and carefully quenched with sat.  $\text{NaHCO}_3$ . The organic layer was washed with water and brine, dried over  $\text{Na}_2\text{SO}_4$ , and evaporated. The residue was purified by column chromatography on silica gel (benzene/EtOAc = 40 : 1) to give **1e** (2.71 g, 24%) as a colorless oil.  $^1\text{H}$  NMR (500 MHz,  $\text{CDCl}_3$ )  $\delta$  7.03 (d,  $J = 10.2$  Hz, 2 H), 6.29 (d,  $J = 10.2$  Hz, 2 H), 1.53 (s, 3 H), 1.46 (s, 9 H);  $^{13}\text{C}$  NMR (125 MHz,  $\text{CDCl}_3$ )  $\delta$  185.18, 169.58, 149.61 (x2), 128.70 (x2), 82.97, 49.05, 27.81 (x3), 24.79; HRMS (ESI+)  $m/z$  calcd for  $\text{C}_{12}\text{H}_{16}\text{O}_3\text{Na}$  [ $\text{M}+\text{Na}$ ]<sup>+</sup> 231.0992, found 231.0992.

## Preparation of dienones 1f-i

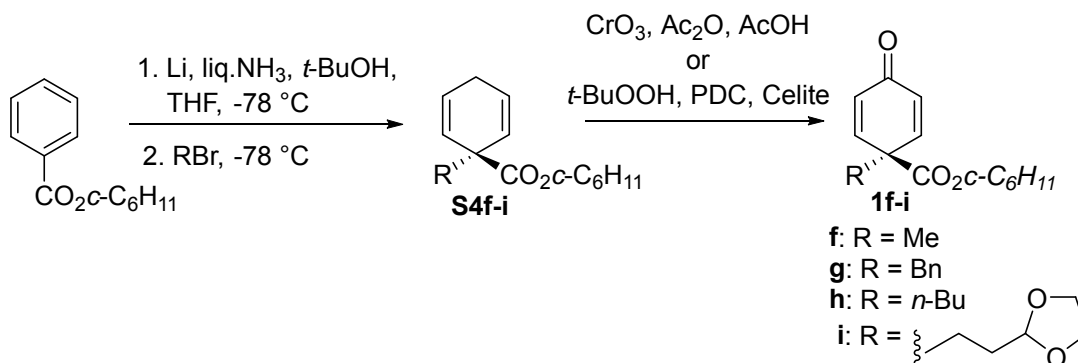

**Typical procedure of reductive alkylation of cyclohexyl benzoate:** Liquid NH<sub>3</sub> was added to the flask cooled to -78 °C. Lithium (1.14 g, 0.16 mmol) was added in small pieces to the stirred solution. A solution of cyclohexyl benzoate (10.3 g, 50.4 mmol) in THF (60 mL) and *t*-butyl alcohol (4.8 mL, 50.2 mmol) was added dropwise to the reaction mixture. The resulting solution was stirred at -78 °C for 2 h. MeI (5 mL, 83.3 mmol) was added dropwise to the reaction mixture. The mixture was warmed slowly to r.t. while the ammonia was removed with a stream of nitrogen. After quenched with water, the mixture was extracted with EtOAc. The organic layer was washed with water and brine, dried over Na<sub>2</sub>SO<sub>4</sub>, and evaporated to crude product of **S4** (9.93 g). The crude product was used for the next reaction without future purification.

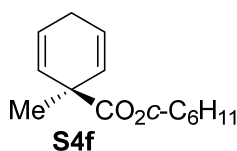

<sup>1</sup>H NMR (500 MHz, CDCl<sub>3</sub>) δ 5.82-5.76 (m, 4 H), 4.80-4.74 (m, 1 H), 2.66-2.63 (m, 2 H), 1.82-1.74 (m, 2 H), 1.73-1.65 (m, 2 H), 1.58-1.24 (m, 6 H), 1.32 (s, 3 H).<sup>5</sup>

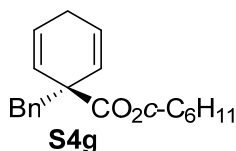

<sup>1</sup>H NMR (500 MHz, CDCl<sub>3</sub>) δ 7.25-7.16 (m, 3 H), 7.14-7.10 (m, 2 H), 5.86-5.76 (m, 4 H), 4.82-4.75 (m, 1 H), 2.98 (bs, 2 H), 2.58-2.49 (m, 1 H), 2.40-2.31 (m, 1 H), 1.81-1.72 (m, 2 H), 1.71-1.62 (m, 2 H), 1.54-1.23 (m, 6 H); <sup>13</sup>C NMR (125

MHz, CDCl<sub>3</sub>)  $\delta$  173.59, 136.72, 130.51 (x2), 127.63 (x2), 127.40 (x2), 126.31, 125.44 (x2), 72.80, 49.05, 64.44, 31.32 (x2), 26.05, 25.42 (x2), 23.41; HRMS (ESI+)  $m/z$  calcd for C<sub>20</sub>H<sub>24</sub>O<sub>2</sub>Na [M+Na]<sup>+</sup> 319.1668, found 319.1673.

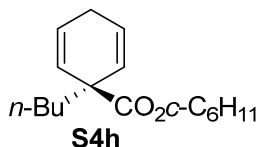

<sup>1</sup>H NMR (500 MHz, CDCl<sub>3</sub>)  $\delta$  6.00-5.60 (m, 4 H), 4.84-4.72 (m, 1 H), 2.75-2.56 (m, 2 H), 1.83-1.09 (m, 16 H), 0.87 (t,  $J$  = 7.2 Hz, 3 H); HRMS (ESI+)  $m/z$  calcd for C<sub>17</sub>H<sub>26</sub>O<sub>2</sub>Na [M+Na]<sup>+</sup> 285.1825, found 285.1829.

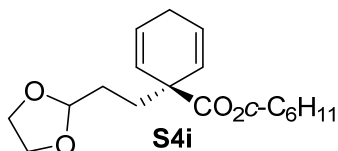

<sup>1</sup>H NMR (500 MHz, CDCl<sub>3</sub>)  $\delta$  5.92-5.86 (m, 2 H), 5.76-5.71 (m, 2 H), 4.84 (t,  $J$  = 4.7 Hz, 1 H), 4.81-4.73 (m, 1 H), 4.00-3.82 (m, 4 H), 2.73-2.54 (m, 2 H), 2.01-1.23 (m, 14 H); HRMS (ESI+)  $m/z$  calcd for C<sub>18</sub>H<sub>26</sub>O<sub>4</sub>Na 329.1723, found 329.1724.

**Oxidation of allylic position of S4:** Oxidation of allylic position of **S4f,g** were according with the procedure for dienone **1e**. The reaction conditions for dienone **1d** were used for the preparation of **1h,i**.

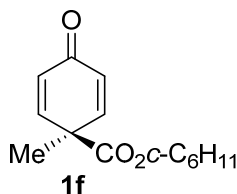

<sup>1</sup>H NMR (500 MHz, CDCl<sub>3</sub>)  $\delta$  7.06 (d,  $J$  = 10.4 Hz, 2 H), 6.30 (d,  $J$  = 10.4 Hz, 2 H), 4.85-4.78 (m, 1 H), 1.84-1.76 (m, 2 H), 1.73-1.64 (m, 2 H), 1.56 (s, 3 H), 1.55-1.26 (m, 6 H); <sup>13</sup>C NMR (125 MHz, CDCl<sub>3</sub>)  $\delta$  185.05, 169.99, 149.27 (x2), 128.90 (x2), 74.45, 48.42, 31.14 (x2), 25.22 (x2), 24.85, 23.31; HRMS (ESI+)  $m/z$  calcd for C<sub>14</sub>H<sub>18</sub>O<sub>3</sub>Na 257.1148, found 257.1151.

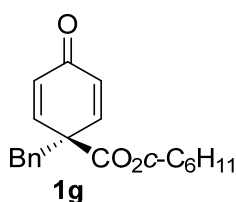

$^1\text{H}$  NMR (500 MHz,  $\text{CDCl}_3$ )  $\delta$  7.29-7.21 (m, 3 H), 7.14-7.07 (m, 4 H), 6.28 (d,  $J$  = 10.3 Hz, 2 H), 4.86-4.78 (m, 1 H), 3.21 (bs, 2 H), 1.80-1.72 (m, 2 H), 1.67-1.57 (m, 2 H), 1.54-1.20 (m, 6 H);  $^{13}\text{C}$  NMR (125 MHz,  $\text{CDCl}_3$ )  $\delta$  185.01, 169.17, 148.00 (x2), 134.45, 130.08 (x2), 129.70 (x2), 128.23 (x2), 127.50, 74.72, 53.44, 45.34, 31.17 (x2), 25.18 (x2), 23.29; HRMS (ESI+)  $m/z$  calcd for  $\text{C}_{20}\text{H}_{22}\text{O}_3\text{Na}$  333.1461, found 333.1466.

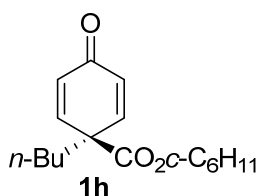

$^1\text{H}$  NMR (500 MHz,  $\text{CDCl}_3$ )  $\delta$  7.07 (d,  $J$  = 10.3 Hz, 2 H), 6.34 (d,  $J$  = 10.3 Hz, 2 H), 4.87-4.79 (m, 1 H), 1.97-1.90 (m, 2 H), 1.86-1.77 (m, 2 H), 1.74-1.65 (m, 2 H), 1.63-1.14 (m, 10 H), 0.87 (t,  $J$  = 7.1 Hz, 3 H),  $^{13}\text{C}$  NMR (125 MHz,  $\text{CDCl}_3$ )  $\delta$  185.69, 170.04, 148.92 (x2), 130.17 (x2), 74.68, 52.93, 38.68, 31.52 (x2), 26.71, 25.53, 23.66, 23.00 (x2), 14.06; HRMS (ESI+)  $m/z$  calcd for  $\text{C}_{17}\text{H}_{24}\text{O}_3\text{Na}$  299.1618, found 299.1617.

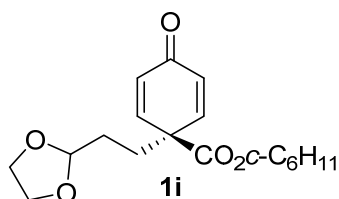

$^1\text{H}$  NMR (500 MHz,  $\text{CDCl}_3$ )  $\delta$  7.06 (d,  $J$  = 10.3 Hz, 2 H), 6.37 (d,  $J$  = 10.3 Hz, 2 H), 4.87-4.78 (m, 2 H), 3.99-3.90 (m, 2 H), 3.89-3.80 (m, 2 H), 2.13-2.07 (m, 2 H), 1.86-1.77 (m, 2 H), 1.74-1.64 (m, 2 H), 1.61-1.24 (m, 8 H);  $^{13}\text{C}$  NMR (125 MHz,  $\text{CDCl}_3$ )  $\delta$  185.47, 169.79, 148.32 (x2), 130.66 (x2), 103.65, 74.93, 65.32 (x2), 52.21, 32.24, 31.51 (x2), 28.73, 25.50 (x2), 23.67; HRMS (ESI+)  $m/z$  calcd for  $\text{C}_{18}\text{H}_{24}\text{O}_5\text{Na}$  343.1516, found 343.1517.

### Preparation of racemic Diels-Alder adduct 3

Racemic adducts **3** were prepared by the Diels-Alder reaction of dienones **1** with cyclopentadiene in  $\text{CF}_3\text{CH}_2\text{OH}$ .<sup>3</sup>

Computational data: Cartesian coordinates, energies and harmonic analyses of transition states in Figure 1.<sup>6</sup>

#### TS<sub>r,anti</sub>

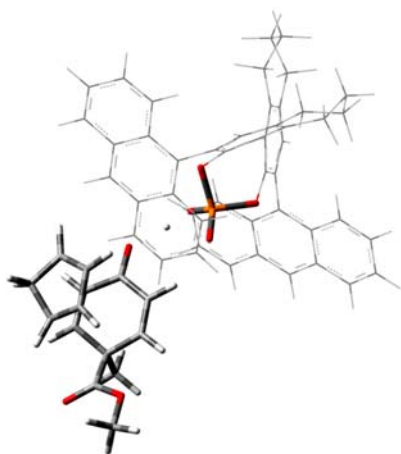

Energy [ONIOM(B3LYP/6-31G\*:HF/3-21G)] =  
-3240.16139791 (Hartree/Particle)

Zero-point correction = 1.106067 (Hartree/Particle)

Thermal correction to Gibbs Free Energy = 0.954159 (Hartree/Particle)

Number of Imaginary Frequencies = 1 (-389.78)

Energy [M06-2X/6-311+G\*\*//ONIOM(B3LYP/6-31G\*:HF/3-21G)] =  
-3262.09256047 (Hartree/Particle)

---

| Center<br>Number | Atomic<br>Number | Atomic<br>Type | Coordinates (Angstroms) |           |           |
|------------------|------------------|----------------|-------------------------|-----------|-----------|
|                  |                  |                | X                       | Y         | Z         |
| 1                | 8                | 0              | -1.980289               | 0.529881  | 0.733009  |
| 2                | 8                | 0              | -0.408878               | -0.980452 | -0.646991 |
| 3                | 15               | 0              | -0.443360               | 0.469685  | 0.150952  |
| 4                | 8                | 0              | -0.366975               | 1.433811  | -1.081122 |
| 5                | 8                | 0              | 0.524049                | 0.620211  | 1.260591  |

---

|    |   |   |           |           |           |
|----|---|---|-----------|-----------|-----------|
| 6  | 6 | 0 | 3.831162  | 3.518245  | -0.570145 |
| 7  | 6 | 0 | 5.170128  | 3.078501  | -0.405348 |
| 8  | 6 | 0 | 5.559607  | 1.774464  | -1.115170 |
| 9  | 6 | 0 | 4.409981  | 0.796202  | -1.115275 |
| 10 | 6 | 0 | 3.128399  | 1.201542  | -1.079936 |
| 11 | 6 | 0 | 2.768632  | 2.623147  | -0.936671 |
| 12 | 8 | 0 | 1.595092  | 3.034484  | -1.129954 |
| 13 | 6 | 0 | 5.905527  | 2.107642  | -2.608775 |
| 14 | 6 | 0 | 3.235745  | 3.419085  | 1.947783  |
| 15 | 6 | 0 | 3.345825  | 2.042998  | 2.063904  |
| 16 | 6 | 0 | 4.695541  | 1.687787  | 1.883664  |
| 17 | 6 | 0 | 5.446872  | 2.840855  | 1.538284  |
| 18 | 6 | 0 | 4.608770  | 4.020910  | 2.013935  |
| 19 | 1 | 0 | 2.310939  | 3.981839  | 2.004403  |
| 20 | 1 | 0 | 4.746357  | 4.957278  | 1.469333  |
| 21 | 1 | 0 | 4.864954  | 4.212247  | 3.069190  |
| 22 | 1 | 0 | 3.577460  | 4.571454  | -0.525641 |
| 23 | 1 | 0 | 2.515196  | 1.351688  | 2.152635  |
| 24 | 1 | 0 | 5.937516  | 3.844520  | -0.502462 |
| 25 | 1 | 0 | 6.529186  | 2.860297  | 1.615421  |
| 26 | 1 | 0 | 5.064701  | 0.668452  | 1.884928  |
| 27 | 1 | 0 | 4.640464  | -0.257019 | -1.236806 |
| 28 | 1 | 0 | 6.174471  | 1.196230  | -3.153827 |
| 29 | 1 | 0 | 5.036897  | 2.560232  | -3.092117 |
| 30 | 1 | 0 | 6.748568  | 2.804356  | -2.652783 |
| 31 | 6 | 0 | 6.873489  | 1.217251  | -0.551721 |
| 32 | 8 | 0 | 7.823055  | 1.910174  | -0.250020 |
| 33 | 8 | 0 | 6.909484  | -0.131303 | -0.502474 |
| 34 | 6 | 0 | 8.164973  | -0.695486 | -0.082620 |
| 35 | 1 | 0 | 8.025513  | -1.776280 | -0.119381 |
| 36 | 1 | 0 | 8.967740  | -0.387356 | -0.756965 |
| 37 | 1 | 0 | 8.409642  | -0.371995 | 0.932129  |
| 38 | 1 | 0 | 0.440820  | 2.093861  | -1.099915 |
| 39 | 1 | 0 | 2.323207  | 0.480087  | -1.172575 |
| 40 | 6 | 0 | -0.905885 | -2.085608 | 0.051574  |
| 41 | 6 | 0 | -1.918700 | -4.129837 | 1.602810  |



|    |   |   |           |           |           |
|----|---|---|-----------|-----------|-----------|
| 42 | 6 | 0 | -2.270326 | -2.182976 | 0.237634  |
| 43 | 6 | 0 | -0.032894 | -3.034071 | 0.549214  |
| 44 | 6 | 0 | -0.564428 | -4.061445 | 1.302750  |
| 45 | 6 | 0 | -2.785570 | -3.177265 | 1.078253  |
| 46 | 1 | 0 | 0.098419  | -4.811377 | 1.688614  |
| 47 | 6 | 0 | -3.033091 | 0.144968  | -0.103135 |
| 48 | 6 | 0 | -4.979260 | -0.620549 | -1.903288 |
| 49 | 6 | 0 | -3.915203 | 1.099373  | -0.569896 |
| 50 | 6 | 0 | -3.157711 | -1.190132 | -0.442277 |
| 51 | 6 | 0 | -4.095834 | -1.573541 | -1.405828 |
| 52 | 6 | 0 | -4.895987 | 0.688453  | -1.451601 |
| 53 | 6 | 0 | -3.872146 | 2.524248  | -0.114454 |
| 54 | 6 | 0 | -4.012346 | 5.206881  | 0.667059  |
| 55 | 6 | 0 | -4.452544 | 2.862140  | 1.112812  |
| 56 | 6 | 0 | -3.349824 | 3.517257  | -0.946374 |
| 57 | 6 | 0 | -3.435619 | 4.884098  | -0.548723 |
| 58 | 6 | 0 | -4.514611 | 4.228500  | 1.509292  |
| 59 | 1 | 0 | -4.074173 | 6.237141  | 0.962719  |
| 60 | 6 | 0 | 1.435694  | -2.999928 | 0.263235  |
| 61 | 6 | 0 | 4.189348  | -3.183127 | -0.206868 |
| 62 | 6 | 0 | 1.902076  | -3.451417 | -0.976367 |
| 63 | 6 | 0 | 2.337791  | -2.616899 | 1.259394  |
| 64 | 6 | 0 | 3.738971  | -2.732239 | 1.022131  |
| 65 | 6 | 0 | 3.304253  | -3.532845 | -1.214478 |
| 66 | 1 | 0 | 5.245274  | -3.267214 | -0.381956 |
| 67 | 6 | 0 | -4.064479 | -2.981483 | -1.993881 |
| 68 | 1 | 0 | -3.275270 | -2.994946 | -2.742043 |
| 69 | 6 | 0 | -4.267872 | -3.172829 | 1.444750  |
| 70 | 1 | 0 | -4.582880 | -2.148821 | 1.598157  |
| 71 | 1 | 0 | -4.852999 | -3.566129 | 0.621054  |
| 72 | 6 | 0 | -2.394055 | -5.241285 | 2.532507  |
| 73 | 1 | 0 | -2.060154 | -5.009973 | 3.540336  |
| 74 | 1 | 0 | -1.920864 | -6.172531 | 2.240155  |
| 75 | 6 | 0 | -3.921423 | -5.399287 | 2.543532  |
| 76 | 1 | 0 | -4.213970 | -6.054985 | 3.355761  |
| 77 | 1 | 0 | -4.255216 | -5.850990 | 1.614509  |

|     |   |   |           |           |           |
|-----|---|---|-----------|-----------|-----------|
| 78  | 6 | 0 | -4.563723 | -4.013751 | 2.696907  |
| 79  | 1 | 0 | -4.160038 | -3.522927 | 3.576580  |
| 80  | 1 | 0 | -5.636976 | -4.097420 | 2.826069  |
| 81  | 6 | 0 | -6.075325 | -0.975453 | -2.902864 |
| 82  | 1 | 0 | -6.201038 | -0.154262 | -3.599342 |
| 83  | 1 | 0 | -5.594554 | 1.416920  | -1.814509 |
| 84  | 1 | 0 | -7.010103 | -1.084599 | -2.358744 |
| 85  | 6 | 0 | -5.794060 | -2.278577 | -3.665934 |
| 86  | 1 | 0 | -6.677148 | -2.572216 | -4.222426 |
| 87  | 1 | 0 | -4.989133 | -2.122715 | -4.376943 |
| 88  | 6 | 0 | -5.005405 | 1.879813  | 2.002736  |
| 89  | 1 | 0 | -4.963334 | 0.851686  | 1.713467  |
| 90  | 6 | 0 | -5.112934 | 4.561838  | 2.769123  |
| 91  | 1 | 0 | -5.148925 | 5.595800  | 3.053330  |
| 92  | 6 | 0 | -5.559356 | 2.235781  | 3.177652  |
| 93  | 1 | 0 | -5.963143 | 1.488474  | 3.831580  |
| 94  | 6 | 0 | -5.615115 | 3.606618  | 3.572969  |
| 95  | 1 | 0 | -6.060001 | 3.863156  | 4.513850  |
| 96  | 6 | 0 | -2.714623 | 3.218631  | -2.200601 |
| 97  | 1 | 0 | -2.582444 | 2.194764  | -2.472021 |
| 98  | 6 | 0 | -2.925001 | 5.897542  | -1.426401 |
| 99  | 1 | 0 | -3.004210 | 6.921572  | -1.116259 |
| 100 | 6 | 0 | -2.246154 | 4.202042  | -2.991409 |
| 101 | 1 | 0 | -1.759791 | 3.962113  | -3.915537 |
| 102 | 6 | 0 | -2.360916 | 5.571963  | -2.603167 |
| 103 | 1 | 0 | -1.979083 | 6.333513  | -3.253783 |
| 104 | 6 | 0 | 1.909813  | -2.097568 | 2.529693  |
| 105 | 1 | 0 | 0.866160  | -1.935756 | 2.687218  |
| 106 | 6 | 0 | 1.016783  | -3.850330 | -2.034532 |
| 107 | 1 | 0 | -0.036683 | -3.792485 | -1.864275 |
| 108 | 6 | 0 | 1.494678  | -4.280418 | -3.217953 |
| 109 | 1 | 0 | 0.819708  | -4.569021 | -3.998843 |
| 110 | 6 | 0 | 3.768337  | -3.998168 | -2.489218 |
| 111 | 1 | 0 | 4.827322  | -4.054049 | -2.652382 |
| 112 | 6 | 0 | 2.900910  | -4.356499 | -3.453508 |
| 113 | 1 | 0 | 3.254627  | -4.702640 | -4.404266 |

|     |   |   |           |           |           |
|-----|---|---|-----------|-----------|-----------|
| 114 | 6 | 0 | 2.802108  | -1.779350 | 3.486559  |
| 115 | 1 | 0 | 2.466985  | -1.383661 | 4.424141  |
| 116 | 6 | 0 | 4.652907  | -2.389256 | 2.074020  |
| 117 | 1 | 0 | 5.703268  | -2.506911 | 1.888974  |
| 118 | 6 | 0 | 4.203911  | -1.942916 | 3.262247  |
| 119 | 1 | 0 | 4.891060  | -1.697814 | 4.048023  |
| 120 | 6 | 0 | -5.386287 | -3.374000 | -2.670333 |
| 121 | 1 | 0 | -5.263500 | -4.324950 | -3.176997 |
| 122 | 1 | 0 | -6.164580 | -3.493756 | -1.922499 |
| 123 | 1 | 0 | -3.791283 | -3.704027 | -1.241890 |

---

TS<sub>r,syn</sub>:

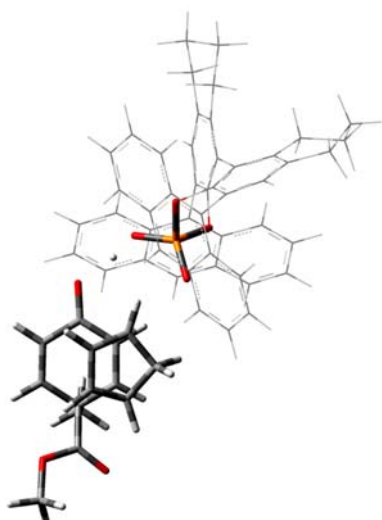

Energy [ONIOM(B3LYP/6-31G\*:HF/3-21G)] =  
-3240.16492005 (Hartree/Particle)

Zero-point correction = 1.050446 (Hartree/Particle)

Thermal correction to Gibbs Free Energy = 0.954749 (Hartree/Particle)

Number of Imaginary Frequencies = 1 (-362.06)

Energy [M06-2X/6-311+G\*\*//ONIOM(B3LYP/6-31G\*:HF/3-21G)] =  
-3262.09416858 (Hartree/Particle)

---

| Center<br>Number | Atomic<br>Number | Atomic<br>Type | Coordinates (Angstroms) |   |   |
|------------------|------------------|----------------|-------------------------|---|---|
|                  |                  |                | X                       | Y | Z |

---

|    |    |   |           |           |           |
|----|----|---|-----------|-----------|-----------|
| 1  | 6  | 0 | 1.103266  | -2.055452 | -0.050597 |
| 2  | 6  | 0 | 2.469249  | -2.044218 | -0.259422 |
| 3  | 6  | 0 | 0.898456  | -4.062133 | -1.280290 |
| 4  | 6  | 0 | 3.047866  | -3.007871 | -1.093167 |
| 5  | 6  | 0 | 0.298998  | -3.073200 | -0.525300 |
| 6  | 6  | 0 | 2.248950  | -4.028682 | -1.598673 |
| 7  | 6  | 0 | 4.507934  | -2.876375 | -1.518314 |
| 8  | 1  | 0 | 0.289951  | -4.864215 | -1.650105 |
| 9  | 6  | 0 | 5.092333  | -4.187131 | -2.066073 |
| 10 | 6  | 0 | 4.149914  | -4.766344 | -3.130210 |
| 11 | 6  | 0 | 2.815542  | -5.144221 | -2.470693 |
| 12 | 6  | 0 | 3.845498  | 1.366079  | 0.542863  |
| 13 | 1  | 0 | 5.483217  | 1.822409  | 1.798645  |
| 14 | 6  | 0 | 4.852092  | 1.038211  | 1.428469  |
| 15 | 6  | 0 | 3.282707  | -0.979307 | 0.407514  |
| 16 | 6  | 0 | 5.046884  | -0.261762 | 1.874965  |
| 17 | 6  | 0 | 3.048713  | 0.340322  | 0.071281  |
| 18 | 6  | 0 | 4.254403  | -1.285644 | 1.367950  |
| 19 | 6  | 0 | 6.157636  | -0.521303 | 2.887144  |
| 20 | 6  | 0 | 5.979950  | -1.847770 | 3.640112  |
| 21 | 6  | 0 | 5.702734  | -2.968445 | 2.628591  |
| 22 | 6  | 0 | 4.365299  | -2.704490 | 1.920415  |
| 23 | 8  | 0 | 0.532818  | -0.981302 | 0.645111  |
| 24 | 8  | 0 | 1.966971  | 0.640597  | -0.764092 |
| 25 | 15 | 0 | 0.444803  | 0.445893  | -0.185903 |
| 26 | 8  | 0 | 0.300828  | 1.476054  | 0.984469  |
| 27 | 8  | 0 | -0.533596 | 0.469178  | -1.299163 |
| 28 | 1  | 0 | 5.847488  | 1.909773  | -3.861598 |
| 29 | 6  | 0 | 5.385505  | 2.623498  | -3.208672 |
| 30 | 1  | 0 | 4.905766  | 1.198934  | -1.740773 |
| 31 | 6  | 0 | 4.863923  | 2.226512  | -2.032037 |
| 32 | 6  | 0 | 4.754319  | 4.907007  | -2.804117 |
| 33 | 6  | 0 | 4.235215  | 3.163251  | -1.143145 |
| 34 | 6  | 0 | 5.330163  | 3.993467  | -3.606992 |
| 35 | 6  | 0 | 4.186928  | 4.529362  | -1.542452 |
| 36 | 6  | 0 | 3.685914  | 2.782392  | 0.085988  |

|    |   |   |           |           |           |
|----|---|---|-----------|-----------|-----------|
| 37 | 1 | 0 | 5.751553  | 4.282907  | -4.549147 |
| 38 | 1 | 0 | 4.706912  | 5.939963  | -3.090321 |
| 39 | 6 | 0 | 3.087729  | 3.732247  | 0.917260  |
| 40 | 6 | 0 | 3.063675  | 5.100826  | 0.516886  |
| 41 | 6 | 0 | 3.610001  | 5.466237  | -0.700896 |
| 42 | 6 | 0 | -2.946442 | -3.865295 | 1.298189  |
| 43 | 6 | 0 | -3.879778 | -3.577916 | 0.315888  |
| 44 | 6 | 0 | -1.561785 | -3.662214 | 1.032301  |
| 45 | 1 | 0 | -5.498053 | -2.975454 | -1.725810 |
| 46 | 6 | 0 | -1.162158 | -3.160435 | -0.210972 |
| 47 | 6 | 0 | -2.114904 | -2.846839 | -1.184348 |
| 48 | 6 | 0 | -1.759859 | -2.292287 | -2.462029 |
| 49 | 6 | 0 | -3.496981 | -3.075697 | -0.915943 |
| 50 | 6 | 0 | -2.698848 | -2.038026 | -3.393904 |
| 51 | 1 | 0 | -0.736141 | -2.051132 | -2.645416 |
| 52 | 1 | 0 | -2.416903 | -1.619324 | -4.339286 |
| 53 | 6 | 0 | -4.079459 | -2.298547 | -3.132481 |
| 54 | 1 | 0 | -4.805134 | -2.092387 | -3.894207 |
| 55 | 6 | 0 | -4.463079 | -2.787750 | -1.938245 |
| 56 | 1 | 0 | 3.589253  | 6.497640  | -0.998385 |
| 57 | 1 | 0 | -4.920706 | -3.754470 | 0.511438  |
| 58 | 6 | 0 | -0.623398 | -3.996716 | 2.066923  |
| 59 | 1 | 0 | 0.417608  | -3.847618 | 1.876429  |
| 60 | 6 | 0 | -1.037708 | -4.479773 | 3.253809  |
| 61 | 1 | 0 | -0.324061 | -4.718934 | 4.016889  |
| 62 | 6 | 0 | -3.341980 | -4.383427 | 2.575607  |
| 63 | 1 | 0 | -4.388737 | -4.530584 | 2.759334  |
| 64 | 6 | 0 | -2.427029 | -4.678131 | 3.517128  |
| 65 | 1 | 0 | -2.729612 | -5.064022 | 4.470217  |
| 66 | 6 | 0 | 2.480462  | 3.386868  | 2.173201  |
| 67 | 1 | 0 | 2.430547  | 2.356328  | 2.446422  |
| 68 | 6 | 0 | 1.937392  | 4.331187  | 2.963831  |
| 69 | 1 | 0 | 1.472637  | 4.054671  | 3.888790  |
| 70 | 6 | 0 | 2.476426  | 6.072429  | 1.394176  |
| 71 | 1 | 0 | 2.474818  | 7.099142  | 1.082626  |
| 72 | 6 | 0 | 1.942812  | 5.705272  | 2.573021  |

|     |   |   |           |           |           |
|-----|---|---|-----------|-----------|-----------|
| 73  | 1 | 0 | 1.504897  | 6.435723  | 3.224115  |
| 74  | 6 | 0 | -3.379319 | 1.099670  | 0.260473  |
| 75  | 6 | 0 | -4.700199 | 0.755723  | -0.126919 |
| 76  | 6 | 0 | -5.827288 | 1.019354  | 0.883652  |
| 77  | 6 | 0 | -5.545331 | 2.254810  | 1.702227  |
| 78  | 6 | 0 | -4.292409 | 2.680908  | 1.934115  |
| 79  | 6 | 0 | -3.118655 | 2.026677  | 1.327209  |
| 80  | 8 | 0 | -1.977297 | 2.307863  | 1.774800  |
| 81  | 6 | 0 | -5.897940 | -0.200648 | 1.863593  |
| 82  | 6 | 0 | -2.963968 | 2.755520  | -1.631437 |
| 83  | 6 | 0 | -3.910480 | 3.686973  | -1.227813 |
| 84  | 6 | 0 | -5.191051 | 3.128362  | -1.375861 |
| 85  | 6 | 0 | -5.061857 | 1.776376  | -1.787631 |
| 86  | 6 | 0 | -3.664946 | 1.665498  | -2.382881 |
| 87  | 1 | 0 | -1.887477 | 2.871448  | -1.607539 |
| 88  | 1 | 0 | -3.186353 | 0.687538  | -2.344243 |
| 89  | 1 | 0 | -3.729667 | 1.964266  | -3.443317 |
| 90  | 1 | 0 | -3.694239 | 4.649595  | -0.777209 |
| 91  | 1 | 0 | -4.801662 | -0.209158 | -0.618594 |
| 92  | 1 | 0 | -5.896331 | 1.227126  | -2.213183 |
| 93  | 1 | 0 | -6.119611 | 3.610182  | -1.090299 |
| 94  | 1 | 0 | -6.388950 | 2.736254  | 2.187757  |
| 95  | 1 | 0 | -6.671249 | -0.043495 | 2.624451  |
| 96  | 1 | 0 | -4.934559 | -0.328619 | 2.361868  |
| 97  | 1 | 0 | -6.135926 | -1.109279 | 1.304159  |
| 98  | 6 | 0 | -7.187628 | 1.027351  | 0.173003  |
| 99  | 8 | 0 | -7.566976 | 0.133357  | -0.554222 |
| 100 | 8 | 0 | -7.946393 | 2.106084  | 0.464817  |
| 101 | 6 | 0 | -9.256283 | 2.118884  | -0.133331 |
| 102 | 1 | 0 | -9.724250 | 3.040864  | 0.212079  |
| 103 | 1 | 0 | -9.831577 | 1.247873  | 0.190025  |
| 104 | 1 | 0 | -9.178670 | 2.109280  | -1.223285 |
| 105 | 1 | 0 | -4.088123 | 3.511204  | 2.604857  |
| 106 | 1 | 0 | 7.106669  | -0.544343 | 2.357464  |
| 107 | 1 | 0 | 6.198523  | 0.304716  | 3.588038  |
| 108 | 1 | 0 | 6.872152  | -2.061597 | 4.217975  |

|     |   |   |           |           |           |
|-----|---|---|-----------|-----------|-----------|
| 109 | 1 | 0 | 5.146002  | -1.770950 | 4.330299  |
| 110 | 1 | 0 | 6.506984  | -3.005045 | 1.899687  |
| 111 | 1 | 0 | 5.661885  | -3.931880 | 3.124686  |
| 112 | 1 | 0 | 3.558471  | -2.833848 | 2.637941  |
| 113 | 1 | 0 | 4.205429  | -3.429566 | 1.137879  |
| 114 | 1 | 0 | 4.547755  | -2.121776 | -2.300277 |
| 115 | 1 | 0 | 5.108139  | -2.509309 | -0.700726 |
| 116 | 1 | 0 | 6.073181  | -3.994357 | -2.486271 |
| 117 | 1 | 0 | 5.212657  | -4.904729 | -1.259845 |
| 118 | 1 | 0 | 3.981684  | -4.024849 | -3.904539 |
| 119 | 1 | 0 | 4.586631  | -5.642187 | -3.596864 |
| 120 | 1 | 0 | 2.969790  | -6.021577 | -1.847669 |
| 121 | 1 | 0 | 2.085346  | -5.409041 | -3.226999 |
| 122 | 1 | 0 | -2.538499 | 0.560784  | -0.159466 |
| 123 | 1 | 0 | -0.661074 | 1.772693  | 1.238505  |

---

**TS<sub>1,anti</sub>**

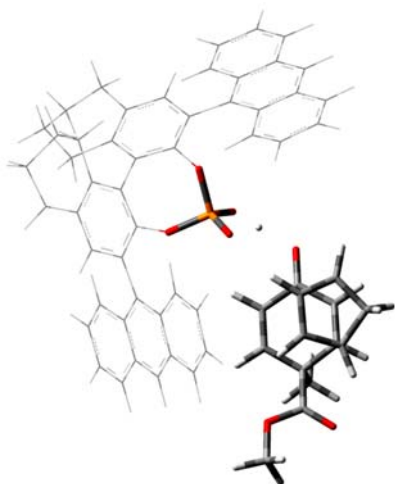

Energy [ONIOM(B3LYP/6-31G\*:HF/3-21G)] =

-3240.16327498 (Hartree/Particle)

Zero-point correction = 1.051014 (Hartree/Particle)

Thermal correction to Gibbs Free Energy = 0.955546 (Hartree/Particle)

Number of Imaginary Frequencies = 1 (-376.13)

Energy [M06-2X/6-311+G\*\*//ONIOM(B3LYP/6-31G\*:HF/3-21G)] =

-3262.09364187 (Hartee/Particle)

---

| Center<br>Number | Atomic<br>Number | Atomic<br>Type | Coordinates (Angstroms) |           |           |
|------------------|------------------|----------------|-------------------------|-----------|-----------|
|                  |                  |                | X                       | Y         | Z         |
| 1                | 8                | 0              | -1.980289               | 0.529881  | 0.733009  |
| 2                | 8                | 0              | -0.408878               | -0.980452 | -0.646991 |
| 3                | 15               | 0              | -0.443360               | 0.469685  | 0.150952  |
| 4                | 8                | 0              | -0.366975               | 1.433811  | -1.081122 |
| 5                | 8                | 0              | 0.524049                | 0.620211  | 1.260591  |
| 6                | 6                | 0              | 3.831162                | 3.518245  | -0.570145 |
| 7                | 6                | 0              | 5.170128                | 3.078501  | -0.405348 |
| 8                | 6                | 0              | 5.559607                | 1.774464  | -1.115170 |
| 9                | 6                | 0              | 4.409981                | 0.796202  | -1.115275 |
| 10               | 6                | 0              | 3.128399                | 1.201542  | -1.079936 |
| 11               | 6                | 0              | 2.768632                | 2.623147  | -0.936671 |
| 12               | 8                | 0              | 1.595092                | 3.034484  | -1.129954 |
| 13               | 6                | 0              | 5.905527                | 2.107642  | -2.608775 |
| 14               | 6                | 0              | 3.235745                | 3.419085  | 1.947783  |
| 15               | 6                | 0              | 3.345825                | 2.042998  | 2.063904  |
| 16               | 6                | 0              | 4.695541                | 1.687787  | 1.883664  |
| 17               | 6                | 0              | 5.446872                | 2.840855  | 1.538284  |
| 18               | 6                | 0              | 4.608770                | 4.020910  | 2.013935  |
| 19               | 1                | 0              | 2.310939                | 3.981839  | 2.004403  |
| 20               | 1                | 0              | 4.746357                | 4.957278  | 1.469333  |
| 21               | 1                | 0              | 4.864954                | 4.212247  | 3.069190  |
| 22               | 1                | 0              | 3.577460                | 4.571454  | -0.525641 |
| 23               | 1                | 0              | 2.515196                | 1.351688  | 2.152635  |
| 24               | 1                | 0              | 5.937516                | 3.844520  | -0.502462 |
| 25               | 1                | 0              | 6.529186                | 2.860297  | 1.615421  |
| 26               | 1                | 0              | 5.064701                | 0.668452  | 1.884928  |
| 27               | 1                | 0              | 4.640464                | -0.257019 | -1.236806 |
| 28               | 1                | 0              | 6.174471                | 1.196230  | -3.153827 |
| 29               | 1                | 0              | 5.036897                | 2.560232  | -3.092117 |
| 30               | 1                | 0              | 6.748568                | 2.804356  | -2.652783 |
| 31               | 6                | 0              | 6.873489                | 1.217251  | -0.551721 |

---



|    |   |   |           |           |           |
|----|---|---|-----------|-----------|-----------|
| 32 | 8 | 0 | 7.823055  | 1.910174  | -0.250020 |
| 33 | 8 | 0 | 6.909484  | -0.131303 | -0.502474 |
| 34 | 6 | 0 | 8.164973  | -0.695486 | -0.082620 |
| 35 | 1 | 0 | 8.025513  | -1.776280 | -0.119381 |
| 36 | 1 | 0 | 8.967740  | -0.387356 | -0.756965 |
| 37 | 1 | 0 | 8.409642  | -0.371995 | 0.932129  |
| 38 | 1 | 0 | 0.440820  | 2.093861  | -1.099915 |
| 39 | 1 | 0 | 2.323207  | 0.480087  | -1.172575 |
| 40 | 6 | 0 | -0.905885 | -2.085608 | 0.051574  |
| 41 | 6 | 0 | -1.918700 | -4.129837 | 1.602810  |
| 42 | 6 | 0 | -2.270326 | -2.182976 | 0.237634  |
| 43 | 6 | 0 | -0.032894 | -3.034071 | 0.549214  |
| 44 | 6 | 0 | -0.564428 | -4.061445 | 1.302750  |
| 45 | 6 | 0 | -2.785570 | -3.177265 | 1.078253  |
| 46 | 1 | 0 | 0.098419  | -4.811377 | 1.688614  |
| 47 | 6 | 0 | -3.033091 | 0.144968  | -0.103135 |
| 48 | 6 | 0 | -4.979260 | -0.620549 | -1.903288 |
| 49 | 6 | 0 | -3.915203 | 1.099373  | -0.569896 |
| 50 | 6 | 0 | -3.157711 | -1.190132 | -0.442277 |
| 51 | 6 | 0 | -4.095834 | -1.573541 | -1.405828 |
| 52 | 6 | 0 | -4.895987 | 0.688453  | -1.451601 |
| 53 | 6 | 0 | -3.872146 | 2.524248  | -0.114454 |
| 54 | 6 | 0 | -4.012346 | 5.206881  | 0.667059  |
| 55 | 6 | 0 | -4.452544 | 2.862140  | 1.112812  |
| 56 | 6 | 0 | -3.349824 | 3.517257  | -0.946374 |
| 57 | 6 | 0 | -3.435619 | 4.884098  | -0.548723 |
| 58 | 6 | 0 | -4.514611 | 4.228500  | 1.509292  |
| 59 | 1 | 0 | -4.074173 | 6.237141  | 0.962719  |
| 60 | 6 | 0 | 1.435694  | -2.999928 | 0.263235  |
| 61 | 6 | 0 | 4.189348  | -3.183127 | -0.206868 |
| 62 | 6 | 0 | 1.902076  | -3.451417 | -0.976367 |
| 63 | 6 | 0 | 2.337791  | -2.616899 | 1.259394  |
| 64 | 6 | 0 | 3.738971  | -2.732239 | 1.022131  |
| 65 | 6 | 0 | 3.304253  | -3.532845 | -1.214478 |
| 66 | 1 | 0 | 5.245274  | -3.267214 | -0.381956 |
| 67 | 6 | 0 | -4.064479 | -2.981483 | -1.993881 |

|     |   |   |           |           |           |
|-----|---|---|-----------|-----------|-----------|
| 68  | 1 | 0 | -3.275270 | -2.994946 | -2.742043 |
| 69  | 6 | 0 | -4.267872 | -3.172829 | 1.444750  |
| 70  | 1 | 0 | -4.582880 | -2.148821 | 1.598157  |
| 71  | 1 | 0 | -4.852999 | -3.566129 | 0.621054  |
| 72  | 6 | 0 | -2.394055 | -5.241285 | 2.532507  |
| 73  | 1 | 0 | -2.060154 | -5.009973 | 3.540336  |
| 74  | 1 | 0 | -1.920864 | -6.172531 | 2.240155  |
| 75  | 6 | 0 | -3.921423 | -5.399287 | 2.543532  |
| 76  | 1 | 0 | -4.213970 | -6.054985 | 3.355761  |
| 77  | 1 | 0 | -4.255216 | -5.850990 | 1.614509  |
| 78  | 6 | 0 | -4.563723 | -4.013751 | 2.696907  |
| 79  | 1 | 0 | -4.160038 | -3.522927 | 3.576580  |
| 80  | 1 | 0 | -5.636976 | -4.097420 | 2.826069  |
| 81  | 6 | 0 | -6.075325 | -0.975453 | -2.902864 |
| 82  | 1 | 0 | -6.201038 | -0.154262 | -3.599342 |
| 83  | 1 | 0 | -5.594554 | 1.416920  | -1.814509 |
| 84  | 1 | 0 | -7.010103 | -1.084599 | -2.358744 |
| 85  | 6 | 0 | -5.794060 | -2.278577 | -3.665934 |
| 86  | 1 | 0 | -6.677148 | -2.572216 | -4.222426 |
| 87  | 1 | 0 | -4.989133 | -2.122715 | -4.376943 |
| 88  | 6 | 0 | -5.005405 | 1.879813  | 2.002736  |
| 89  | 1 | 0 | -4.963334 | 0.851686  | 1.713467  |
| 90  | 6 | 0 | -5.112934 | 4.561838  | 2.769123  |
| 91  | 1 | 0 | -5.148925 | 5.595800  | 3.053330  |
| 92  | 6 | 0 | -5.559356 | 2.235781  | 3.177652  |
| 93  | 1 | 0 | -5.963143 | 1.488474  | 3.831580  |
| 94  | 6 | 0 | -5.615115 | 3.606618  | 3.572969  |
| 95  | 1 | 0 | -6.060001 | 3.863156  | 4.513850  |
| 96  | 6 | 0 | -2.714623 | 3.218631  | -2.200601 |
| 97  | 1 | 0 | -2.582444 | 2.194764  | -2.472021 |
| 98  | 6 | 0 | -2.925001 | 5.897542  | -1.426401 |
| 99  | 1 | 0 | -3.004210 | 6.921572  | -1.116259 |
| 100 | 6 | 0 | -2.246154 | 4.202042  | -2.991409 |
| 101 | 1 | 0 | -1.759791 | 3.962113  | -3.915537 |
| 102 | 6 | 0 | -2.360916 | 5.571963  | -2.603167 |
| 103 | 1 | 0 | -1.979083 | 6.333513  | -3.253783 |

|     |   |   |           |           |           |
|-----|---|---|-----------|-----------|-----------|
| 104 | 6 | 0 | 1.909813  | -2.097568 | 2.529693  |
| 105 | 1 | 0 | 0.866160  | -1.935756 | 2.687218  |
| 106 | 6 | 0 | 1.016783  | -3.850330 | -2.034532 |
| 107 | 1 | 0 | -0.036683 | -3.792485 | -1.864275 |
| 108 | 6 | 0 | 1.494678  | -4.280418 | -3.217953 |
| 109 | 1 | 0 | 0.819708  | -4.569021 | -3.998843 |
| 110 | 6 | 0 | 3.768337  | -3.998168 | -2.489218 |
| 111 | 1 | 0 | 4.827322  | -4.054049 | -2.652382 |
| 112 | 6 | 0 | 2.900910  | -4.356499 | -3.453508 |
| 113 | 1 | 0 | 3.254627  | -4.702640 | -4.404266 |
| 114 | 6 | 0 | 2.802108  | -1.779350 | 3.486559  |
| 115 | 1 | 0 | 2.466985  | -1.383661 | 4.424141  |
| 116 | 6 | 0 | 4.652907  | -2.389256 | 2.074020  |
| 117 | 1 | 0 | 5.703268  | -2.506911 | 1.888974  |
| 118 | 6 | 0 | 4.203911  | -1.942916 | 3.262247  |
| 119 | 1 | 0 | 4.891060  | -1.697814 | 4.048023  |
| 120 | 6 | 0 | -5.386287 | -3.374000 | -2.670333 |
| 121 | 1 | 0 | -5.263500 | -4.324950 | -3.176997 |
| 122 | 1 | 0 | -6.164580 | -3.493756 | -1.922499 |
| 123 | 1 | 0 | -3.791283 | -3.704027 | -1.241890 |

---

TS\_*l,syn*:

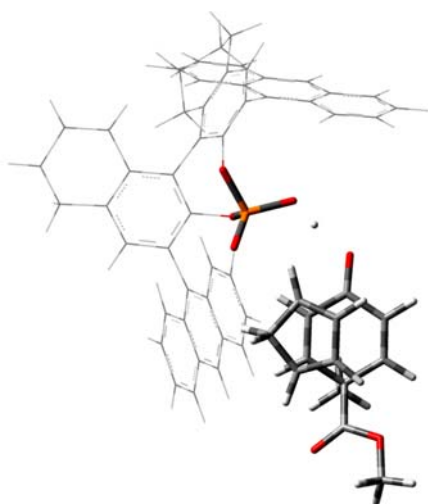

Energy [ONIOM(B3LYP/6-31G\*:HF/3-21G)] =  
-3240.16570320 (Hartree/Particle)

Zero-point correction = 1.050751 (Hartee/Particle)

Thermal correction to Gibbs Free Energy = 0.955756 (Hartee/Particle)

Number of Imaginary Frequencies = 1 (-380.46)

Energy [M06-2X/6-311+G\*\*//ONIOM(B3LYP/6-31G\*:HF/3-21G)] =  
-3262.09603204 (Hartee/Particle)

---

| Center<br>Number | Atomic<br>Number | Atomic<br>Type | Coordinates (Angstroms) |           |           |
|------------------|------------------|----------------|-------------------------|-----------|-----------|
|                  |                  |                | X                       | Y         | Z         |
| 1                | 6                | 0              | 1.103266                | -2.055452 | -0.050597 |
| 2                | 6                | 0              | 2.469249                | -2.044218 | -0.259422 |
| 3                | 6                | 0              | 0.898456                | -4.062133 | -1.280290 |
| 4                | 6                | 0              | 3.047866                | -3.007871 | -1.093167 |
| 5                | 6                | 0              | 0.298998                | -3.073200 | -0.525300 |
| 6                | 6                | 0              | 2.248950                | -4.028682 | -1.598673 |
| 7                | 6                | 0              | 4.507934                | -2.876375 | -1.518314 |
| 8                | 1                | 0              | 0.289951                | -4.864215 | -1.650105 |
| 9                | 6                | 0              | 5.092333                | -4.187131 | -2.066073 |
| 10               | 6                | 0              | 4.149914                | -4.766344 | -3.130210 |
| 11               | 6                | 0              | 2.815542                | -5.144221 | -2.470693 |
| 12               | 6                | 0              | 3.845498                | 1.366079  | 0.542863  |
| 13               | 1                | 0              | 5.483217                | 1.822409  | 1.798645  |
| 14               | 6                | 0              | 4.852092                | 1.038211  | 1.428469  |
| 15               | 6                | 0              | 3.282707                | -0.979307 | 0.407514  |
| 16               | 6                | 0              | 5.046884                | -0.261762 | 1.874965  |
| 17               | 6                | 0              | 3.048713                | 0.340322  | 0.071281  |
| 18               | 6                | 0              | 4.254403                | -1.285644 | 1.367950  |
| 19               | 6                | 0              | 6.157636                | -0.521303 | 2.887144  |
| 20               | 6                | 0              | 5.979950                | -1.847770 | 3.640112  |
| 21               | 6                | 0              | 5.702734                | -2.968445 | 2.628591  |
| 22               | 6                | 0              | 4.365299                | -2.704490 | 1.920415  |
| 23               | 8                | 0              | 0.532818                | -0.981302 | 0.645111  |
| 24               | 8                | 0              | 1.966971                | 0.640597  | -0.764092 |
| 25               | 15               | 0              | 0.444803                | 0.445893  | -0.185903 |
| 26               | 8                | 0              | 0.300828                | 1.476054  | 0.984469  |
| 27               | 8                | 0              | -0.533596               | 0.469178  | -1.299163 |

|    |   |   |           |           |           |
|----|---|---|-----------|-----------|-----------|
| 28 | 1 | 0 | 5.847488  | 1.909773  | -3.861598 |
| 29 | 6 | 0 | 5.385505  | 2.623498  | -3.208672 |
| 30 | 1 | 0 | 4.905766  | 1.198934  | -1.740773 |
| 31 | 6 | 0 | 4.863923  | 2.226512  | -2.032037 |
| 32 | 6 | 0 | 4.754319  | 4.907007  | -2.804117 |
| 33 | 6 | 0 | 4.235215  | 3.163251  | -1.143145 |
| 34 | 6 | 0 | 5.330163  | 3.993467  | -3.606992 |
| 35 | 6 | 0 | 4.186928  | 4.529362  | -1.542452 |
| 36 | 6 | 0 | 3.685914  | 2.782392  | 0.085988  |
| 37 | 1 | 0 | 5.751553  | 4.282907  | -4.549147 |
| 38 | 1 | 0 | 4.706912  | 5.939963  | -3.090321 |
| 39 | 6 | 0 | 3.087729  | 3.732247  | 0.917260  |
| 40 | 6 | 0 | 3.063675  | 5.100826  | 0.516886  |
| 41 | 6 | 0 | 3.610001  | 5.466237  | -0.700896 |
| 42 | 6 | 0 | -2.946442 | -3.865295 | 1.298189  |
| 43 | 6 | 0 | -3.879778 | -3.577916 | 0.315888  |
| 44 | 6 | 0 | -1.561785 | -3.662214 | 1.032301  |
| 45 | 1 | 0 | -5.498053 | -2.975454 | -1.725810 |
| 46 | 6 | 0 | -1.162158 | -3.160435 | -0.210972 |
| 47 | 6 | 0 | -2.114904 | -2.846839 | -1.184348 |
| 48 | 6 | 0 | -1.759859 | -2.292287 | -2.462029 |
| 49 | 6 | 0 | -3.496981 | -3.075697 | -0.915943 |
| 50 | 6 | 0 | -2.698848 | -2.038026 | -3.393904 |
| 51 | 1 | 0 | -0.736141 | -2.051132 | -2.645416 |
| 52 | 1 | 0 | -2.416903 | -1.619324 | -4.339286 |
| 53 | 6 | 0 | -4.079459 | -2.298547 | -3.132481 |
| 54 | 1 | 0 | -4.805134 | -2.092387 | -3.894207 |
| 55 | 6 | 0 | -4.463079 | -2.787750 | -1.938245 |
| 56 | 1 | 0 | 3.589253  | 6.497640  | -0.998385 |
| 57 | 1 | 0 | -4.920706 | -3.754470 | 0.511438  |
| 58 | 6 | 0 | -0.623398 | -3.996716 | 2.066923  |
| 59 | 1 | 0 | 0.417608  | -3.847618 | 1.876429  |
| 60 | 6 | 0 | -1.037708 | -4.479773 | 3.253809  |
| 61 | 1 | 0 | -0.324061 | -4.718934 | 4.016889  |
| 62 | 6 | 0 | -3.341980 | -4.383427 | 2.575607  |
| 63 | 1 | 0 | -4.388737 | -4.530584 | 2.759334  |

|    |   |   |           |           |           |
|----|---|---|-----------|-----------|-----------|
| 64 | 6 | 0 | -2.427029 | -4.678131 | 3.517128  |
| 65 | 1 | 0 | -2.729612 | -5.064022 | 4.470217  |
| 66 | 6 | 0 | 2.480462  | 3.386868  | 2.173201  |
| 67 | 1 | 0 | 2.430547  | 2.356328  | 2.446422  |
| 68 | 6 | 0 | 1.937392  | 4.331187  | 2.963831  |
| 69 | 1 | 0 | 1.472637  | 4.054671  | 3.888790  |
| 70 | 6 | 0 | 2.476426  | 6.072429  | 1.394176  |
| 71 | 1 | 0 | 2.474818  | 7.099142  | 1.082626  |
| 72 | 6 | 0 | 1.942812  | 5.705272  | 2.573021  |
| 73 | 1 | 0 | 1.504897  | 6.435723  | 3.224115  |
| 74 | 6 | 0 | -3.379319 | 1.099670  | 0.260473  |
| 75 | 6 | 0 | -4.700199 | 0.755723  | -0.126919 |
| 76 | 6 | 0 | -5.827288 | 1.019354  | 0.883652  |
| 77 | 6 | 0 | -5.545331 | 2.254810  | 1.702227  |
| 78 | 6 | 0 | -4.292409 | 2.680908  | 1.934115  |
| 79 | 6 | 0 | -3.118655 | 2.026677  | 1.327209  |
| 80 | 8 | 0 | -1.977297 | 2.307863  | 1.774800  |
| 81 | 6 | 0 | -5.897940 | -0.200648 | 1.863593  |
| 82 | 6 | 0 | -2.963968 | 2.755520  | -1.631437 |
| 83 | 6 | 0 | -3.910480 | 3.686973  | -1.227813 |
| 84 | 6 | 0 | -5.191051 | 3.128362  | -1.375861 |
| 85 | 6 | 0 | -5.061857 | 1.776376  | -1.787631 |
| 86 | 6 | 0 | -3.664946 | 1.665498  | -2.382881 |
| 87 | 1 | 0 | -1.887477 | 2.871448  | -1.607539 |
| 88 | 1 | 0 | -3.186353 | 0.687538  | -2.344243 |
| 89 | 1 | 0 | -3.729667 | 1.964266  | -3.443317 |
| 90 | 1 | 0 | -3.694239 | 4.649595  | -0.777209 |
| 91 | 1 | 0 | -4.801662 | -0.209158 | -0.618594 |
| 92 | 1 | 0 | -5.896331 | 1.227126  | -2.213183 |
| 93 | 1 | 0 | -6.119611 | 3.610182  | -1.090299 |
| 94 | 1 | 0 | -6.388950 | 2.736254  | 2.187757  |
| 95 | 1 | 0 | -6.671249 | -0.043495 | 2.624451  |
| 96 | 1 | 0 | -4.934559 | -0.328619 | 2.361868  |
| 97 | 1 | 0 | -6.135926 | -1.109279 | 1.304159  |
| 98 | 6 | 0 | -7.187628 | 1.027351  | 0.173003  |
| 99 | 8 | 0 | -7.566976 | 0.133357  | -0.554222 |

|     |   |   |           |           |           |
|-----|---|---|-----------|-----------|-----------|
| 100 | 8 | 0 | -7.946393 | 2.106084  | 0.464817  |
| 101 | 6 | 0 | -9.256283 | 2.118884  | -0.133331 |
| 102 | 1 | 0 | -9.724250 | 3.040864  | 0.212079  |
| 103 | 1 | 0 | -9.831577 | 1.247873  | 0.190025  |
| 104 | 1 | 0 | -9.178670 | 2.109280  | -1.223285 |
| 105 | 1 | 0 | -4.088123 | 3.511204  | 2.604857  |
| 106 | 1 | 0 | 7.106669  | -0.544343 | 2.357464  |
| 107 | 1 | 0 | 6.198523  | 0.304716  | 3.588038  |
| 108 | 1 | 0 | 6.872152  | -2.061597 | 4.217975  |
| 109 | 1 | 0 | 5.146002  | -1.770950 | 4.330299  |
| 110 | 1 | 0 | 6.506984  | -3.005045 | 1.899687  |
| 111 | 1 | 0 | 5.661885  | -3.931880 | 3.124686  |
| 112 | 1 | 0 | 3.558471  | -2.833848 | 2.637941  |
| 113 | 1 | 0 | 4.205429  | -3.429566 | 1.137879  |
| 114 | 1 | 0 | 4.547755  | -2.121776 | -2.300277 |
| 115 | 1 | 0 | 5.108139  | -2.509309 | -0.700726 |
| 116 | 1 | 0 | 6.073181  | -3.994357 | -2.486271 |
| 117 | 1 | 0 | 5.212657  | -4.904729 | -1.259845 |
| 118 | 1 | 0 | 3.981684  | -4.024849 | -3.904539 |
| 119 | 1 | 0 | 4.586631  | -5.642187 | -3.596864 |
| 120 | 1 | 0 | 2.969790  | -6.021577 | -1.847669 |
| 121 | 1 | 0 | 2.085346  | -5.409041 | -3.226999 |
| 122 | 1 | 0 | -2.538499 | 0.560784  | -0.159466 |
| 123 | 1 | 0 | -0.661074 | 1.772693  | 1.238505  |

-----

**DFT study (B3LYP/6-31G\*) on transition state of thermal and (MeO)<sub>2</sub>P(O)OH-catalyzed Diels-Alder reaction of dienone 1 with cyclopentadiene**

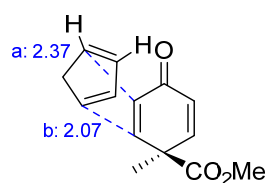

TS of thermal DA reaction

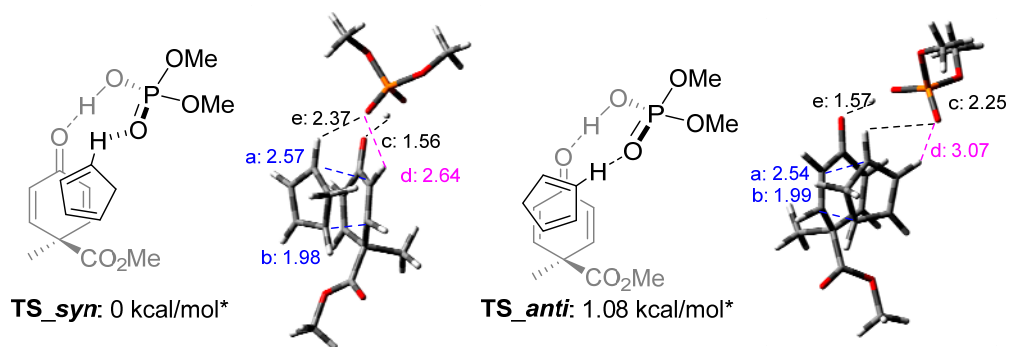

\* relative Gibbs energies at 293 K.

TS of  $(\text{MeO})_2\text{P}(\text{O})\text{OH}$ -catalyzed DA reaction

## TS of thermal DA reaction

| Center Number | Atomic Number | Forces (Hartrees/Bohr) |              |              |
|---------------|---------------|------------------------|--------------|--------------|
|               |               | X                      | Y            | Z            |
| 1             | 6             | 0.000000065            | -0.000000444 | -0.000002093 |
| 2             | 6             | -0.000003293           | -0.000001854 | 0.000001906  |
| 3             | 6             | 0.000000138            | -0.000001245 | -0.000002734 |
| 4             | 6             | 0.000000866            | 0.000001217  | -0.000001627 |
| 5             | 6             | -0.000000409           | -0.000000191 | -0.000002127 |
| 6             | 6             | 0.000000483            | -0.000000109 | 0.000001598  |
| 7             | 8             | -0.000000134           | -0.000000501 | -0.000001123 |
| 8             | 6             | -0.000000228           | 0.000001604  | -0.000003396 |
| 9             | 6             | -0.000001522           | -0.000000237 | 0.000000435  |
| 10            | 8             | -0.000000806           | -0.000000882 | -0.000000492 |
| 11            | 8             | 0.000001629            | 0.000001614  | -0.000000688 |
| 12            | 6             | 0.000001073            | 0.000002270  | -0.000000608 |
| 13            | 6             | 0.000000608            | -0.000006867 | 0.000006042  |
| 14            | 6             | 0.000002160            | 0.000004279  | 0.000000846  |
| 15            | 6             | -0.000000050           | 0.000001554  | 0.000000858  |
| 16            | 6             | -0.000001027           | -0.000005507 | 0.000002685  |



|    |   |              |              |              |
|----|---|--------------|--------------|--------------|
| 17 | 6 | 0.000001671  | 0.000002763  | 0.000002080  |
| 18 | 1 | -0.000000349 | -0.000002791 | 0.000000573  |
| 19 | 1 | -0.000001430 | -0.000003225 | 0.000000324  |
| 20 | 1 | -0.000001074 | 0.000002567  | -0.000002935 |
| 21 | 1 | -0.000002490 | -0.000002161 | -0.000004930 |
| 22 | 1 | 0.000000459  | -0.000002803 | -0.000003078 |
| 23 | 1 | -0.000001560 | -0.000001839 | -0.000000883 |
| 24 | 1 | -0.000000093 | 0.000004021  | -0.000001579 |
| 25 | 1 | -0.000000413 | 0.000001683  | -0.000000753 |
| 26 | 1 | 0.000000594  | 0.000002769  | 0.000000850  |
| 27 | 1 | 0.000001284  | -0.000001166 | 0.000002776  |
| 28 | 1 | 0.000001545  | 0.000001870  | 0.000000866  |
| 29 | 1 | 0.000000785  | 0.000002590  | 0.000000499  |
| 30 | 1 | -0.000000180 | -0.000000820 | 0.000002401  |
| 31 | 1 | 0.000001261  | -0.000000004 | 0.000005171  |
| 32 | 1 | 0.000000214  | -0.000000013 | 0.000001944  |
| 33 | 1 | 0.000000221  | 0.000001857  | -0.000002808 |

-----

**TS of (MeO)<sub>2</sub>P(O)OH-catalyzed DA reaction**

**TS<sub>syn</sub>**

Energy (B3LYP/6-31G\*) = -1491.46396308 (Hartee/Particle)

Zero-point correction = 0.378770 (Hartee/Particle)

Thermal correction to Gibbs Free Energy = 0.319705 (Hartee/Particle)

Number of Imaginary Frequencies = 1 (-375.23)

-----

| Center<br>Number | Atomic<br>Number | Atomic<br>Type | Coordinates (Angstroms) |           |           |
|------------------|------------------|----------------|-------------------------|-----------|-----------|
|                  |                  |                | X                       | Y         | Z         |
| 1                | 6                | 0              | 0.346422                | -0.463310 | -0.160876 |
| 2                | 6                | 0              | 1.621430                | -0.342087 | -0.773263 |
| 3                | 6                | 0              | 2.810485                | -1.016475 | -0.069939 |
| 4                | 6                | 0              | 2.655778                | -0.958845 | 1.429899  |
| 5                | 6                | 0              | 1.447888                | -0.900654 | 2.015045  |
| 6                | 6                | 0              | 0.203925                | -0.809100 | 1.228517  |

|    |    |   |           |           |           |
|----|----|---|-----------|-----------|-----------|
| 7  | 8  | 0 | -0.891970 | -1.043578 | 1.797070  |
| 8  | 6  | 0 | 2.843886  | -2.523822 | -0.494241 |
| 9  | 6  | 0 | 4.134087  | -0.439499 | -0.591910 |
| 10 | 8  | 0 | 4.395198  | -0.332687 | -1.771507 |
| 11 | 8  | 0 | 5.001837  | -0.104594 | 0.386144  |
| 12 | 6  | 0 | 6.285348  | 0.371318  | -0.063572 |
| 13 | 6  | 0 | -0.026877 | 2.060341  | 0.134096  |
| 14 | 6  | 0 | 1.001834  | 2.254454  | 1.044108  |
| 15 | 6  | 0 | 2.231013  | 2.041225  | 0.396958  |
| 16 | 6  | 0 | 0.563607  | 2.035872  | -1.242676 |
| 17 | 6  | 0 | 1.987299  | 1.597963  | -0.929135 |
| 18 | 1  | 0 | -0.559274 | -0.422787 | -0.754405 |
| 19 | 1  | 0 | 1.644399  | -0.499421 | -1.850154 |
| 20 | 1  | 0 | 3.554250  | -1.070306 | 2.029223  |
| 21 | 1  | 0 | 3.666131  | -3.048846 | 0.004997  |
| 22 | 1  | 0 | 1.903149  | -3.004032 | -0.215738 |
| 23 | 1  | 0 | 2.986436  | -2.602454 | -1.575878 |
| 24 | 1  | 0 | 6.852841  | 0.576502  | 0.844175  |
| 25 | 1  | 0 | 6.783048  | -0.390426 | -0.668479 |
| 26 | 1  | 0 | 6.167658  | 1.279170  | -0.660214 |
| 27 | 1  | 0 | -1.092838 | 2.101773  | 0.318387  |
| 28 | 1  | 0 | 0.877539  | 2.444139  | 2.104777  |
| 29 | 1  | 0 | 3.203973  | 2.082092  | 0.874168  |
| 30 | 1  | 0 | 0.011277  | 1.443517  | -1.972573 |
| 31 | 1  | 0 | 0.605866  | 3.071222  | -1.620768 |
| 32 | 1  | 0 | 2.762427  | 1.625716  | -1.689002 |
| 33 | 8  | 0 | -4.654066 | 0.449724  | 0.921476  |
| 34 | 8  | 0 | -4.685020 | -0.692759 | -1.380233 |
| 35 | 15 | 0 | -3.687546 | -0.088784 | -0.267542 |
| 36 | 8  | 0 | -3.030392 | -1.368400 | 0.378103  |
| 37 | 8  | 0 | -2.808979 | 0.960479  | -0.845151 |
| 38 | 1  | 0 | -2.196035 | -1.194399 | 0.947958  |
| 39 | 1  | 0 | 1.333492  | -0.961885 | 3.093990  |
| 40 | 6  | 0 | -5.537944 | -1.803389 | -1.062325 |
| 41 | 1  | 0 | -4.940873 | -2.689225 | -0.828846 |
| 42 | 1  | 0 | -6.147180 | -1.986918 | -1.949709 |

|    |   |   |           |           |           |
|----|---|---|-----------|-----------|-----------|
| 43 | 1 | 0 | -6.186806 | -1.565753 | -0.212610 |
| 44 | 6 | 0 | -5.272066 | 1.734228  | 0.758568  |
| 45 | 1 | 0 | -4.520111 | 2.500724  | 0.550400  |
| 46 | 1 | 0 | -5.782339 | 1.954818  | 1.698442  |
| 47 | 1 | 0 | -6.003407 | 1.713724  | -0.057753 |

-----

**TS\_anti**

Energy (B3LYP/6-31G\*) = -1491.46292958 (Hartee/Particle)

Zero-point correction = 0.378998 (Hartee/Particle)

Thermal correction to Gibbs Free Energy = 0.320389 (Hartee/Particle)

Number of Imaginary Frequencies = 1 (-384.58)

-----

| Center<br>Number | Atomic<br>Number | Atomic<br>Type | Coordinates (Angstroms) |           |           |
|------------------|------------------|----------------|-------------------------|-----------|-----------|
|                  |                  |                | X                       | Y         | Z         |
| 1                | 8                | 0              | -4.471495               | 0.808137  | 0.250277  |
| 2                | 8                | 0              | -4.534070               | -1.446876 | -0.982858 |
| 3                | 15               | 0              | -3.524110               | -0.382341 | -0.317021 |
| 4                | 8                | 0              | -3.054037               | -1.104578 | 1.009325  |
| 5                | 8                | 0              | -2.501903               | 0.075968  | -1.288898 |
| 6                | 6                | 0              | 1.155377                | 0.946170  | 1.681132  |
| 7                | 6                | 0              | 2.442407                | 0.732985  | 1.125199  |
| 8                | 6                | 0              | 2.803666                | -0.707467 | 0.730595  |
| 9                | 6                | 0              | 1.592694                | -1.445701 | 0.216036  |
| 10               | 6                | 0              | 0.343405                | -1.126612 | 0.593988  |
| 11               | 6                | 0              | 0.072030                | 0.016767  | 1.484379  |
| 12               | 8                | 0              | -1.042809               | 0.162148  | 2.043195  |
| 13               | 6                | 0              | 3.321052                | -1.455437 | 2.005749  |
| 14               | 6                | 0              | 0.353159                | 2.549096  | -0.125106 |
| 15               | 6                | 0              | 0.339615                | 1.623140  | -1.158217 |
| 16               | 6                | 0              | 1.667314                | 1.255919  | -1.439862 |
| 17               | 6                | 0              | 2.537566                | 1.874006  | -0.505978 |
| 18               | 6                | 0              | 1.754926                | 3.057020  | 0.047076  |
| 19               | 1                | 0              | -0.524407               | 2.997068  | 0.326832  |
| 20               | 1                | 0              | 2.025889                | 3.383529  | 1.053205  |

|    |   |   |           |           |           |
|----|---|---|-----------|-----------|-----------|
| 21 | 1 | 0 | 1.911168  | 3.911578  | -0.631862 |
| 22 | 1 | 0 | 0.978350  | 1.744768  | 2.392927  |
| 23 | 1 | 0 | -0.552954 | 1.167983  | -1.575050 |
| 24 | 1 | 0 | 3.267492  | 1.240963  | 1.621326  |
| 25 | 1 | 0 | 3.607597  | 1.942717  | -0.676345 |
| 26 | 1 | 0 | 1.963146  | 0.509808  | -2.169208 |
| 27 | 1 | 0 | 1.768433  | -2.314701 | -0.410452 |
| 28 | 1 | 0 | 3.568817  | -2.496340 | 1.769290  |
| 29 | 1 | 0 | 2.544966  | -1.447914 | 2.774497  |
| 30 | 1 | 0 | 4.218916  | -0.962287 | 2.389731  |
| 31 | 6 | 0 | 4.002180  | -0.710046 | -0.229696 |
| 32 | 8 | 0 | 5.017918  | -0.078048 | -0.027345 |
| 33 | 8 | 0 | 3.839529  | -1.519778 | -1.295401 |
| 34 | 6 | 0 | 4.969805  | -1.608142 | -2.184523 |
| 35 | 1 | 0 | 4.667912  | -2.302277 | -2.968719 |
| 36 | 1 | 0 | 5.845968  | -1.983141 | -1.650035 |
| 37 | 1 | 0 | 5.201181  | -0.626298 | -2.604512 |
| 38 | 1 | 0 | -2.276619 | -0.631742 | 1.476475  |
| 39 | 1 | 0 | -0.509773 | -1.713874 | 0.269589  |
| 40 | 6 | 0 | -4.882343 | 1.836845  | -0.661708 |
| 41 | 1 | 0 | -4.016501 | 2.268200  | -1.171738 |
| 42 | 1 | 0 | -5.385223 | 2.599469  | -0.063343 |
| 43 | 1 | 0 | -5.580503 | 1.439498  | -1.407626 |
| 44 | 6 | 0 | -5.549304 | -2.078061 | -0.187685 |
| 45 | 1 | 0 | -5.095499 | -2.702025 | 0.587355  |
| 46 | 1 | 0 | -6.133616 | -2.698051 | -0.870700 |
| 47 | 1 | 0 | -6.199427 | -1.330510 | 0.279043  |

---

## References

1. (a) R. Singh, C. Czekelius, R. R. Schrock, P. Müller and A. H. Hoveyda, *Organometallics*, 2007, **26**, 2528-2539; (b) D. Uruguchi, K. Sorimachi and M. Terada, *J. Am. Chem. Soc.*, 2005, **127**, 9360-9361; (c) S. Hoffmann, A. M. Seayad and B. List, *Angew. Chem. Int. Ed.*, 2005, **44**, 7424-7427; (d) T. Akiyama, J. Itoh, K. Yokota and K. Fuchibe, *Angew.*

- Chem. Int. Ed.*, 2004, **43**, 1566-1568; (e) D. Uraguchi and M. Terada, *J. Am. Chem. Soc.*, 2004, **126**, 5356-5357; (f) D. Uraguchi, K. Sorimachi and M. Terada, *J. Am. Chem. Soc.*, 2004, **126**, 11804-11805; (g) T. R. Wu, L. Shen and J. M. Chong, *Org. Lett.*, 2004, **6**, 2701-2704; (h) D. V. Gribkov, K. C. Hultsch and F. Hampel, *Chem. Eur. J.*, 2003, **9**, 4796-4810; (i) W. C. P. Tsang, R. R. Schrock and A. H. Hoveyda, *Organometallics*, 2001, **20**, 5658-5669; (j) P. Wipf and J.-K. Jung, *J. Org. Chem.*, 2000, **65**, 6319-6337; (k) K. B. Simonsen, K. V. Gothelf and K. A. Jørgensen, *J. Org. Chem.*, 1998, **63**, 7536-7538.
2. M. Bartoszek, M. Beller, J. Deutsch, M. Klawonn, A. Köckritz, N. Nemati, A. Pews-Davtyan, *Tetrahedron*, 2008, **64**, 1316-1322.
  3. K. Ohkata, Y. Tamura, B. S. Brandon, R. Takagi, W. Miyanaga, S. Kojima and L. A. Paquette. *J. Am. Chem. Soc.*, 2004, **126**, 16783-16792.
  4. A. F. Bella, A. M. Z. Slawin and J. C. Walton, *J. Org. Chem.*, 2004, **69**, 5926-5933.
  5. G. Binmore, L. Cardellini and J. C. Walton, *J. Chem. Soc., Perkin Trans. 2*, 1997, 757-762.
  6. Gaussian 09: M. J. Frisch, G. W. Trucks, H. B. Schlegel, G. E. Scuseria, M. A. Robb, J. R. Cheeseman, G. Scalmani, V. Barone, B. Mennucci, G. A. Petersson, H. Nakatsuji, M. Caricato, X. Li, H. P. Hratchian, A. F. Izmaylov, J. Bloino, G. Zheng, J. L. Sonnenberg, M. Hada, M. Ehara, K. Toyota, R. Fukuda, J. Hasegawa, M. Ishida, T. Nakajima, Y. Honda, O. Kitao, H. Nakai, T. Vreven, J. A. Montgomery, Jr., J. E. Peralta, E. Ogliaro, M. Bearpark, J. J. Heyd, E. Brothers, K. N. Kudin, V. N. Staroverov, R. Kobayashi, J. Normand, K. Raghavachari, A. Rendell, J. C. Burant, S. S. Iyengar, J. Tomasi, M. Cossi, N. Rega, M. J. Millam, M. Klene, J. E. Knox, J. B. Cross, V. Bakken, C. Adamo, J. Jaramillo, R. Gomperts, R. E. Stratmann, O. Yazyev, A. J. Austin, R. Cammi, C. Pomelli, J. W. Ochterski, R. L. Martin, K. Morokuma, V. G. Zakrzewski, G. A. Voth, P. Salvador, J. J. Dannenberg, S. Dapprich, A. D. Daniels, Ö, Farkas, J. B. Foresman, J. V. Ortiz, J. Cioslowski and D. J. Fox, Gaussian, Inc., Wallingford CT, 2009.

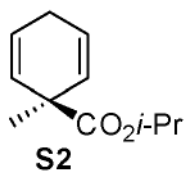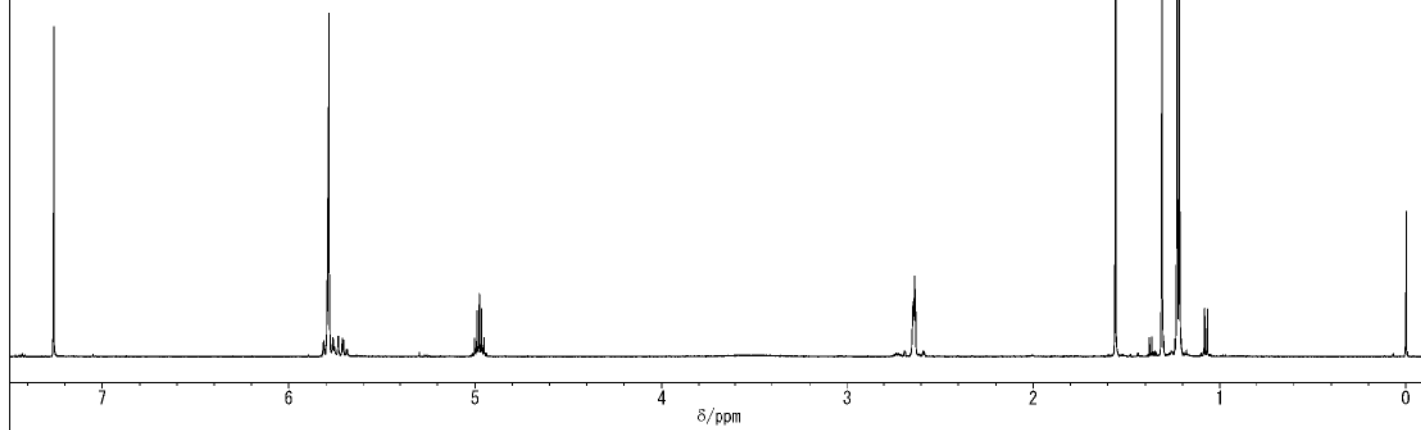

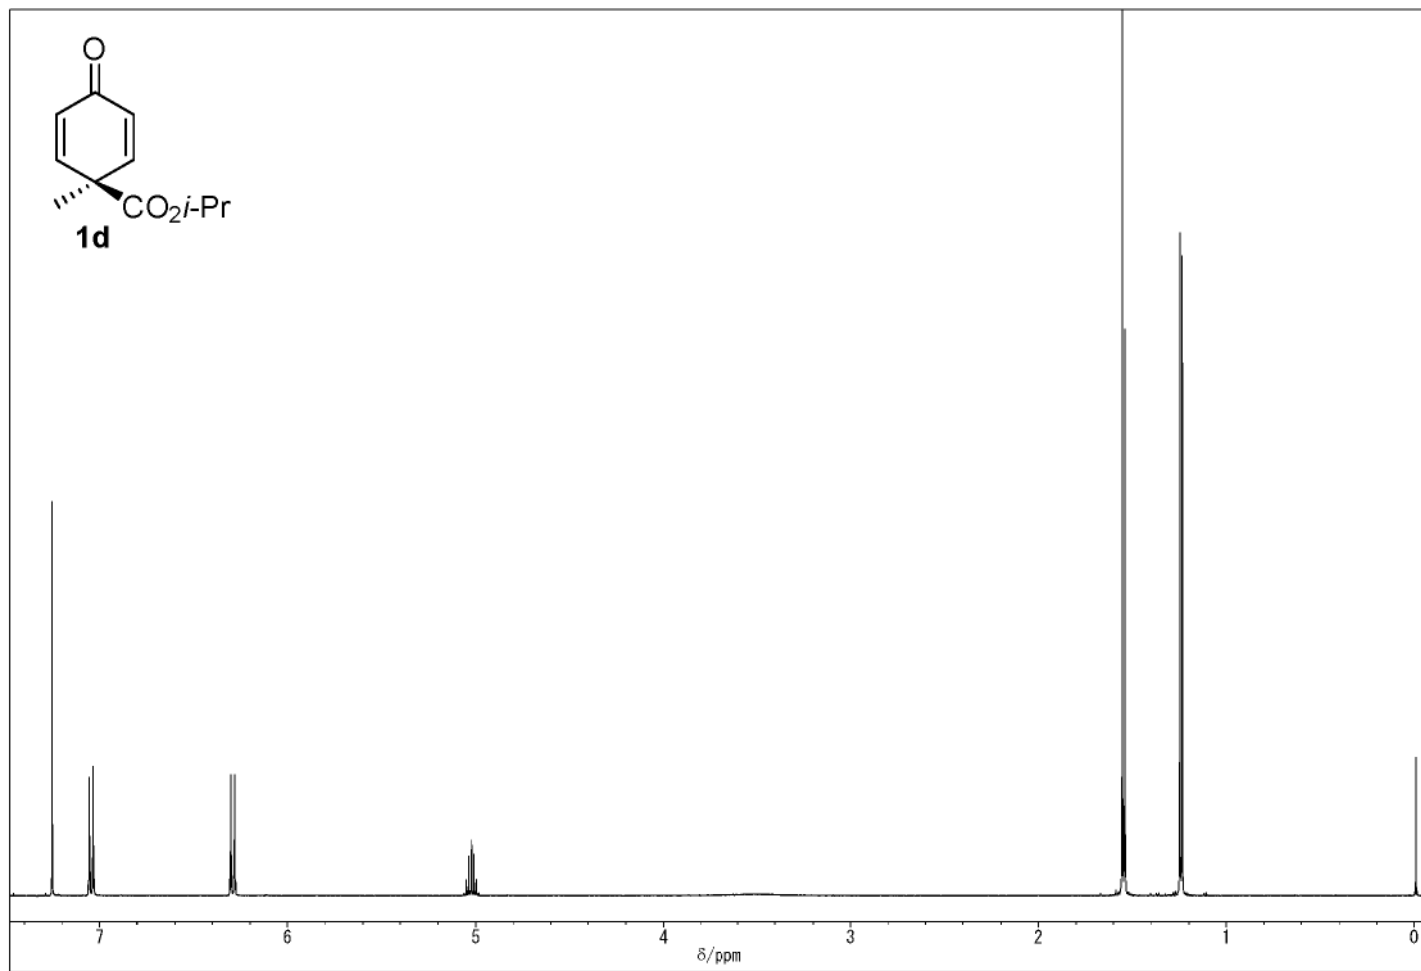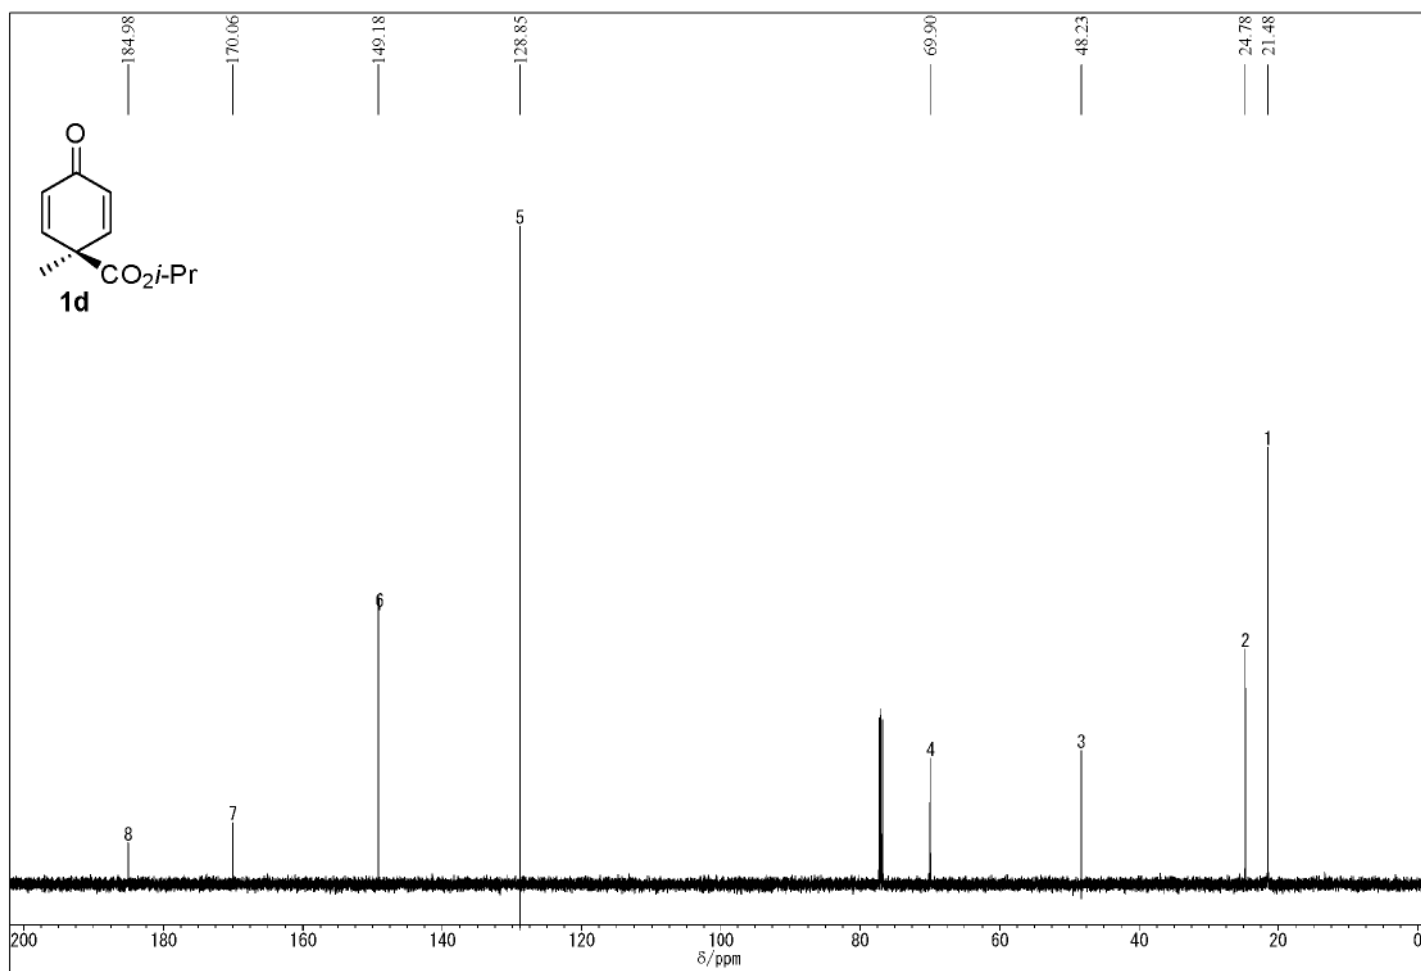

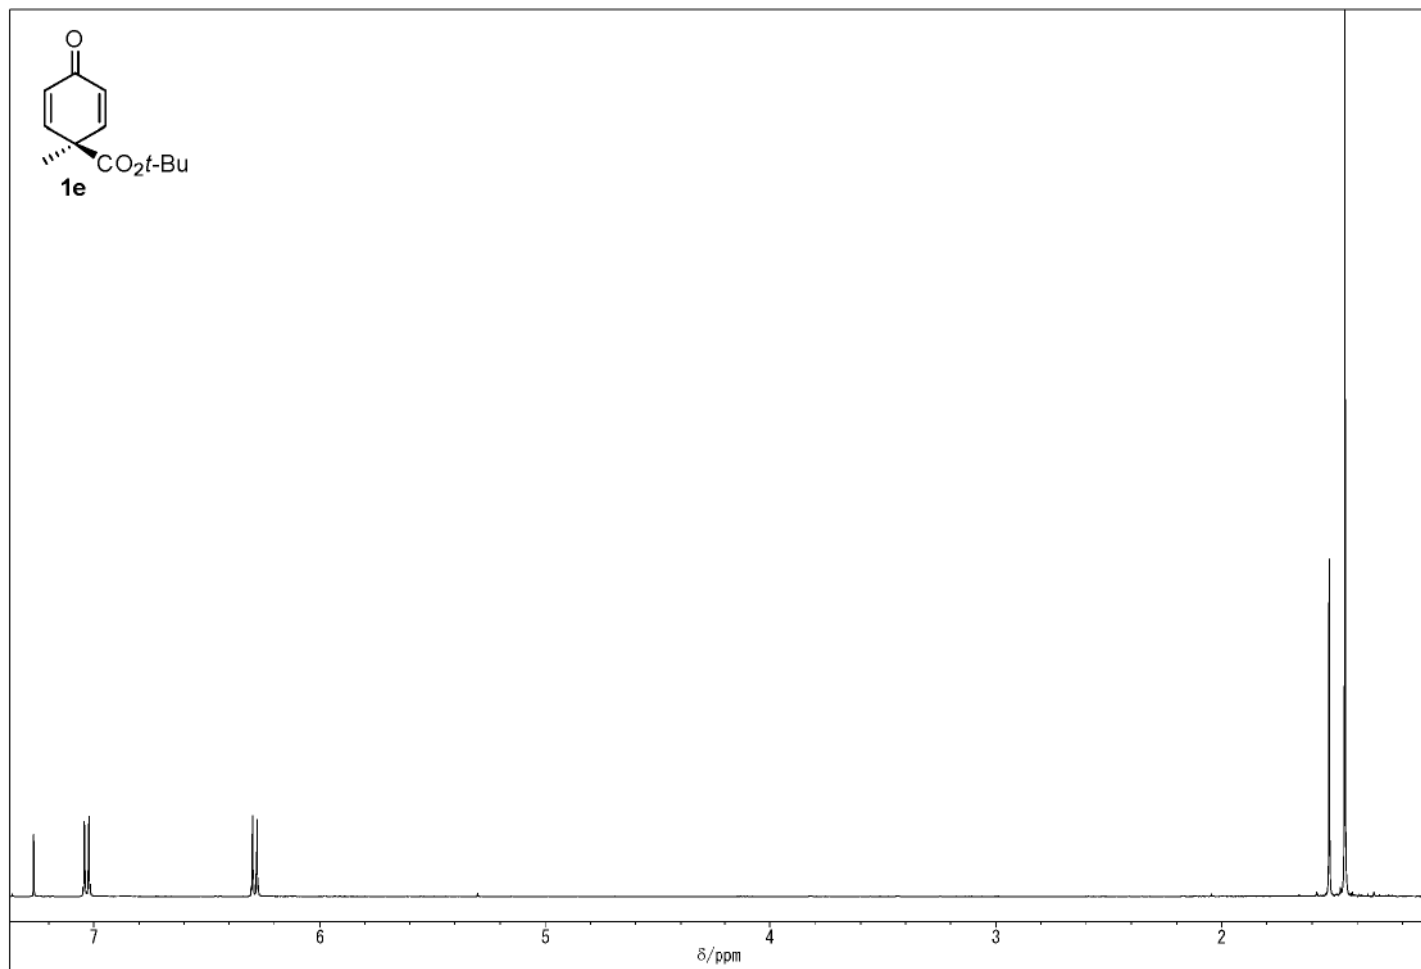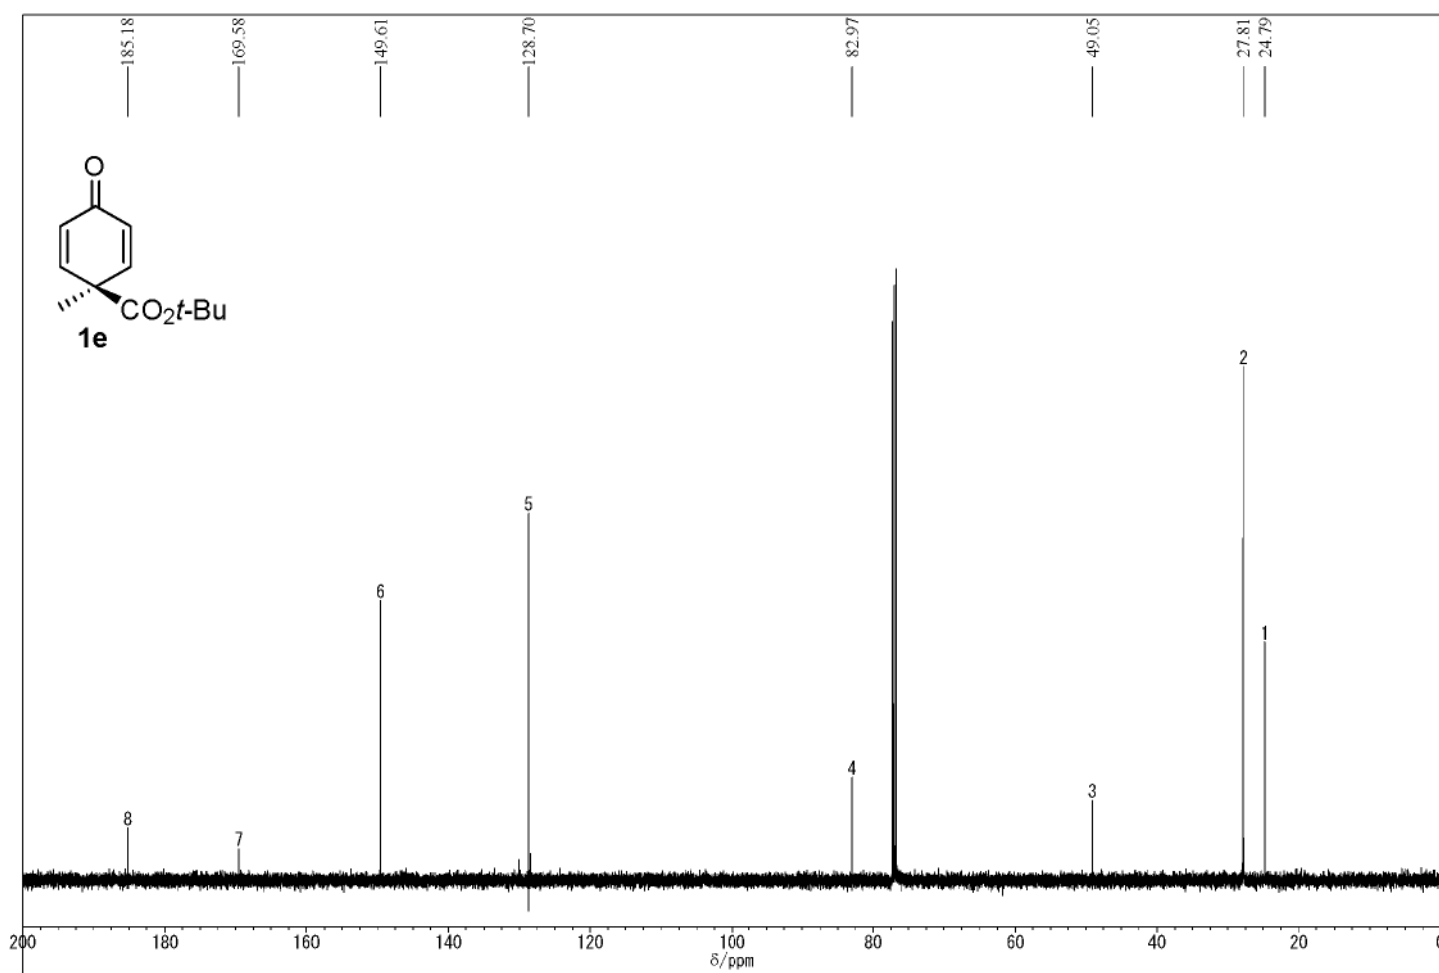



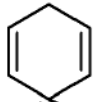

CO<sub>2</sub>C-C<sub>6</sub>H<sub>11</sub>

S4f

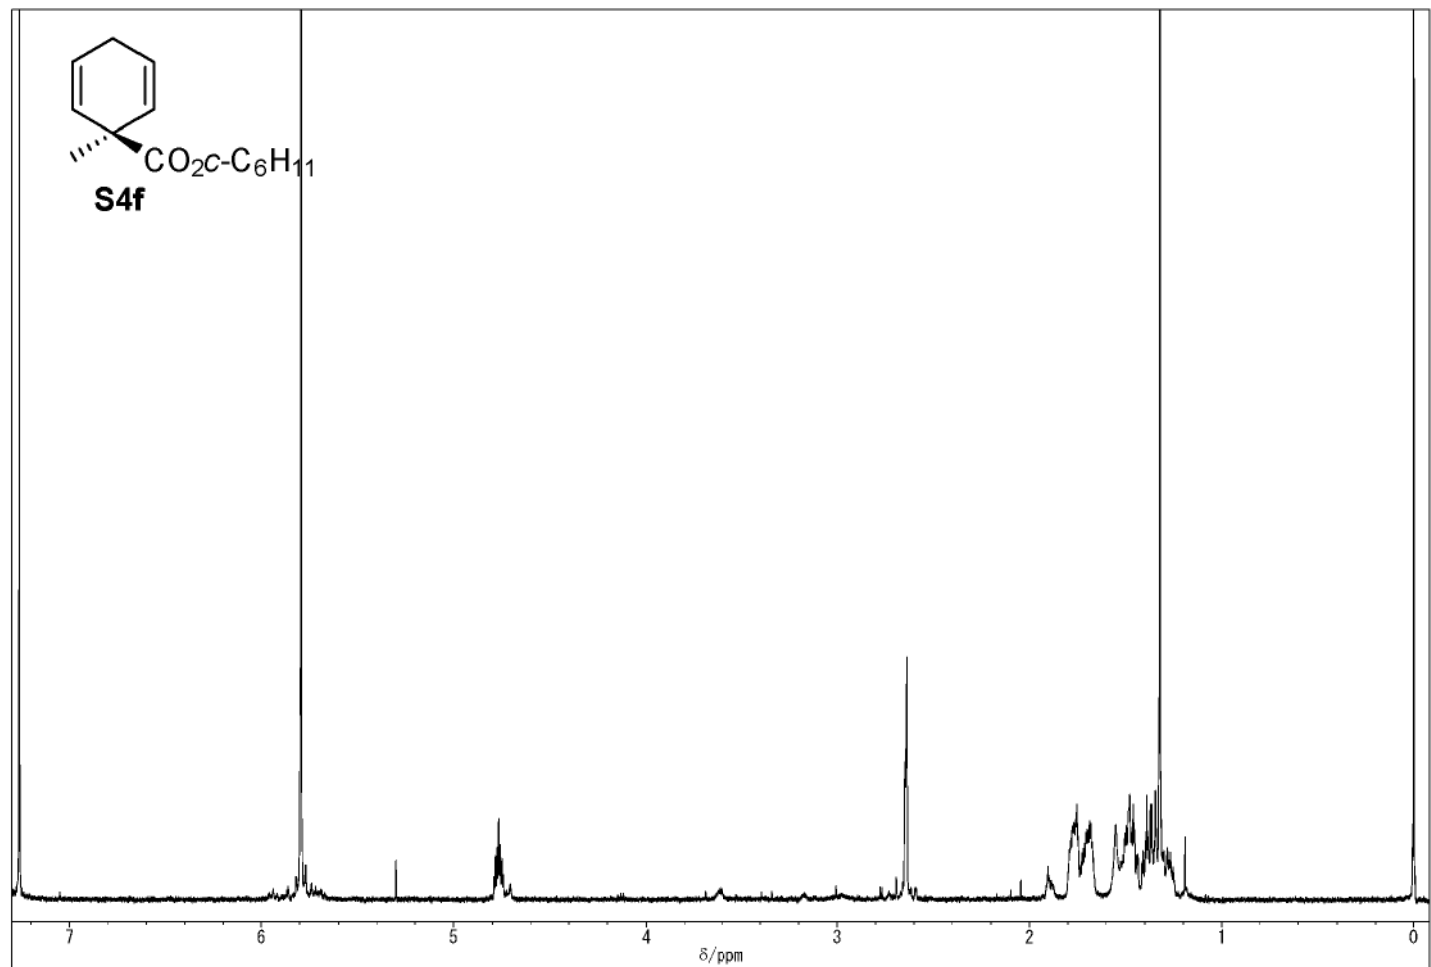

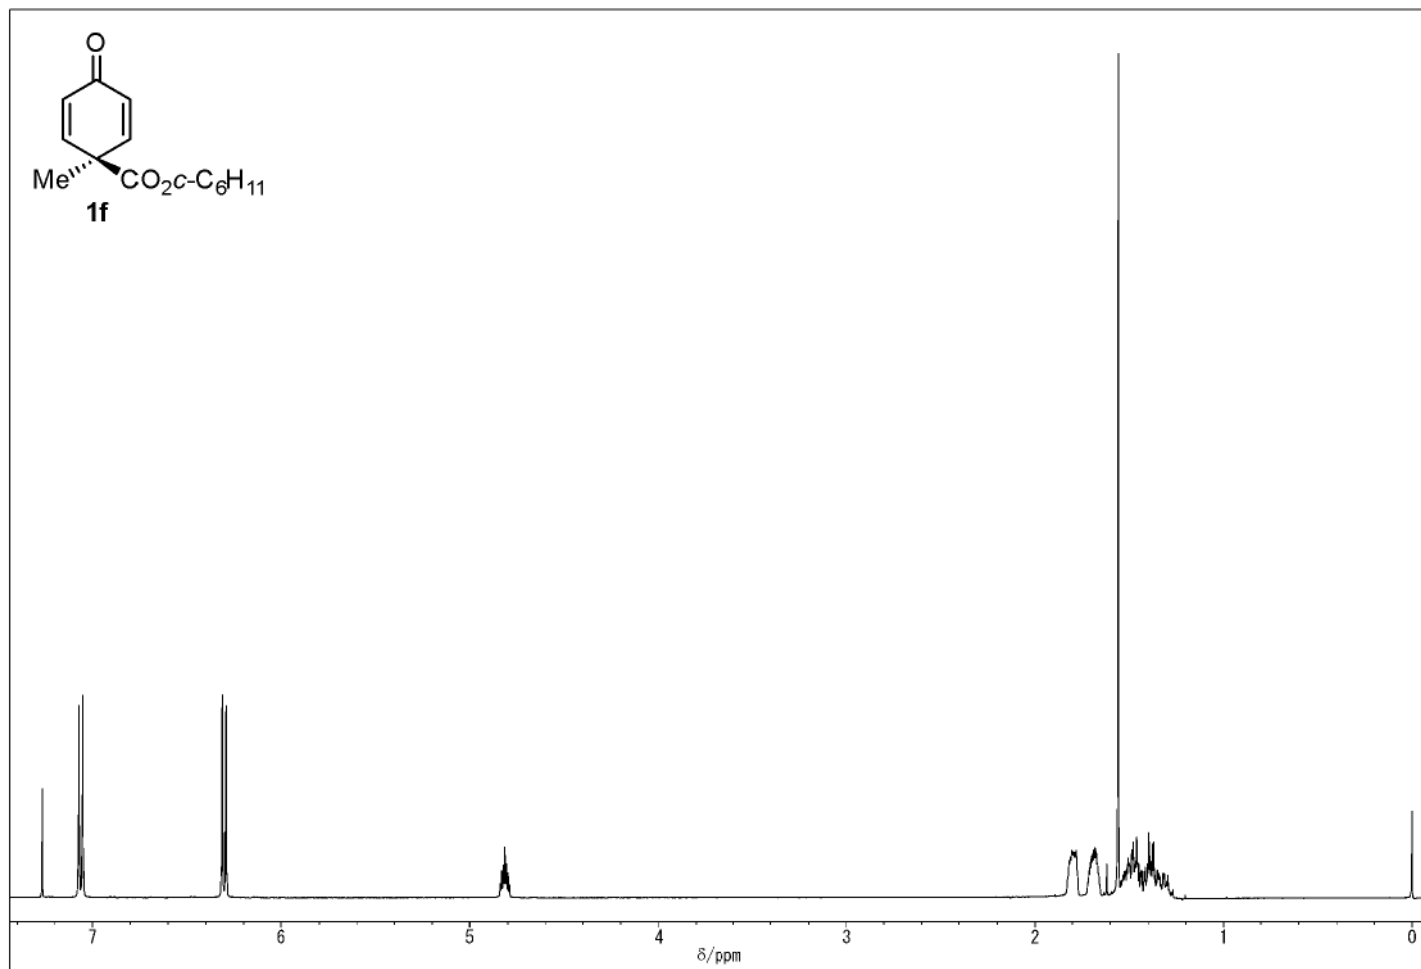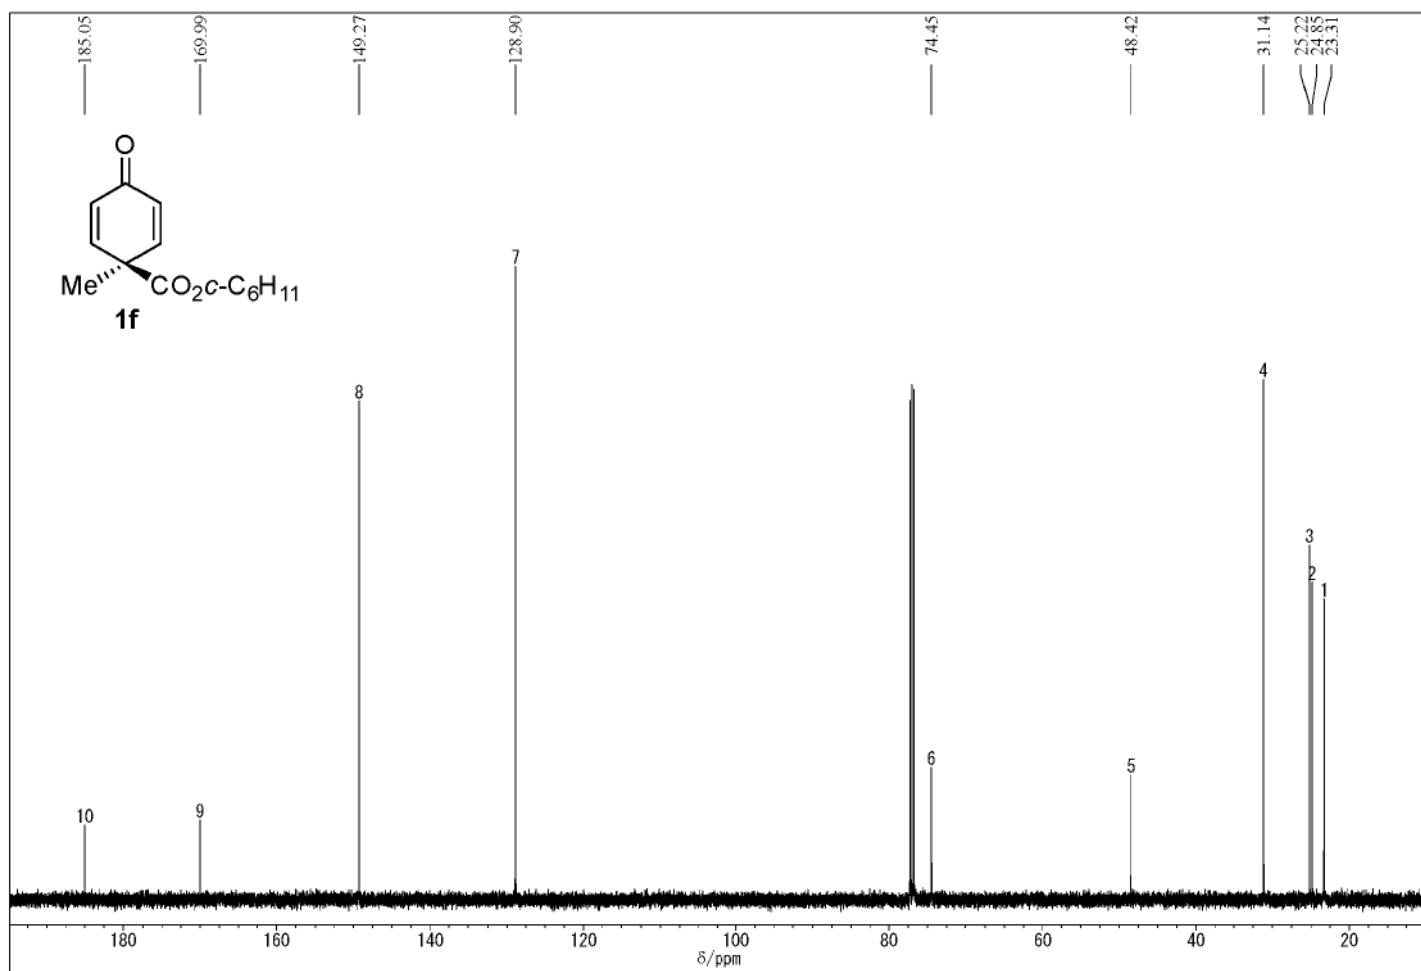

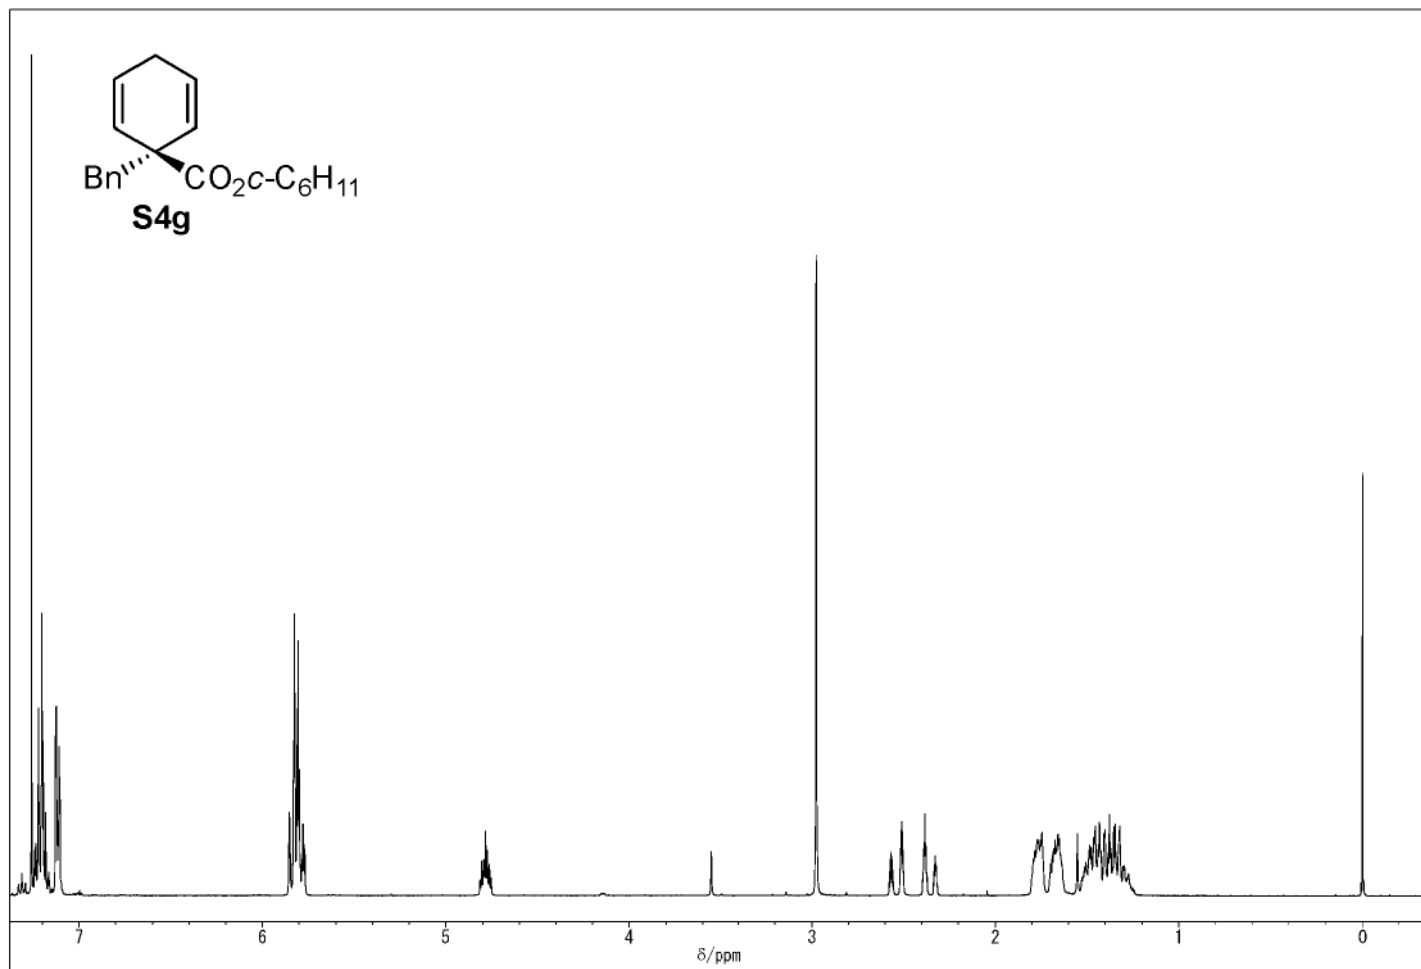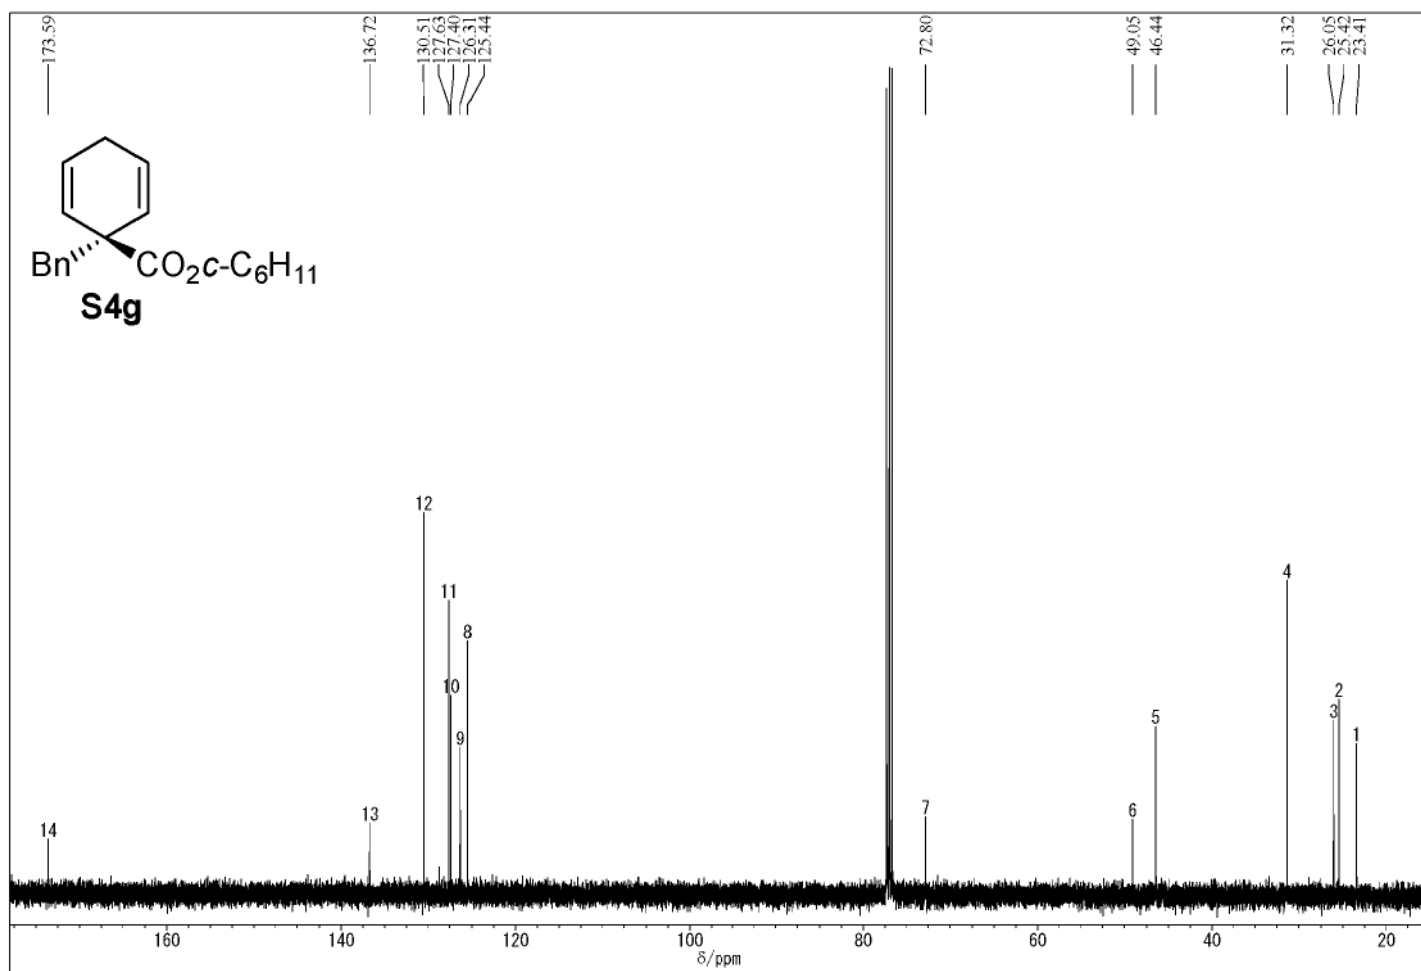

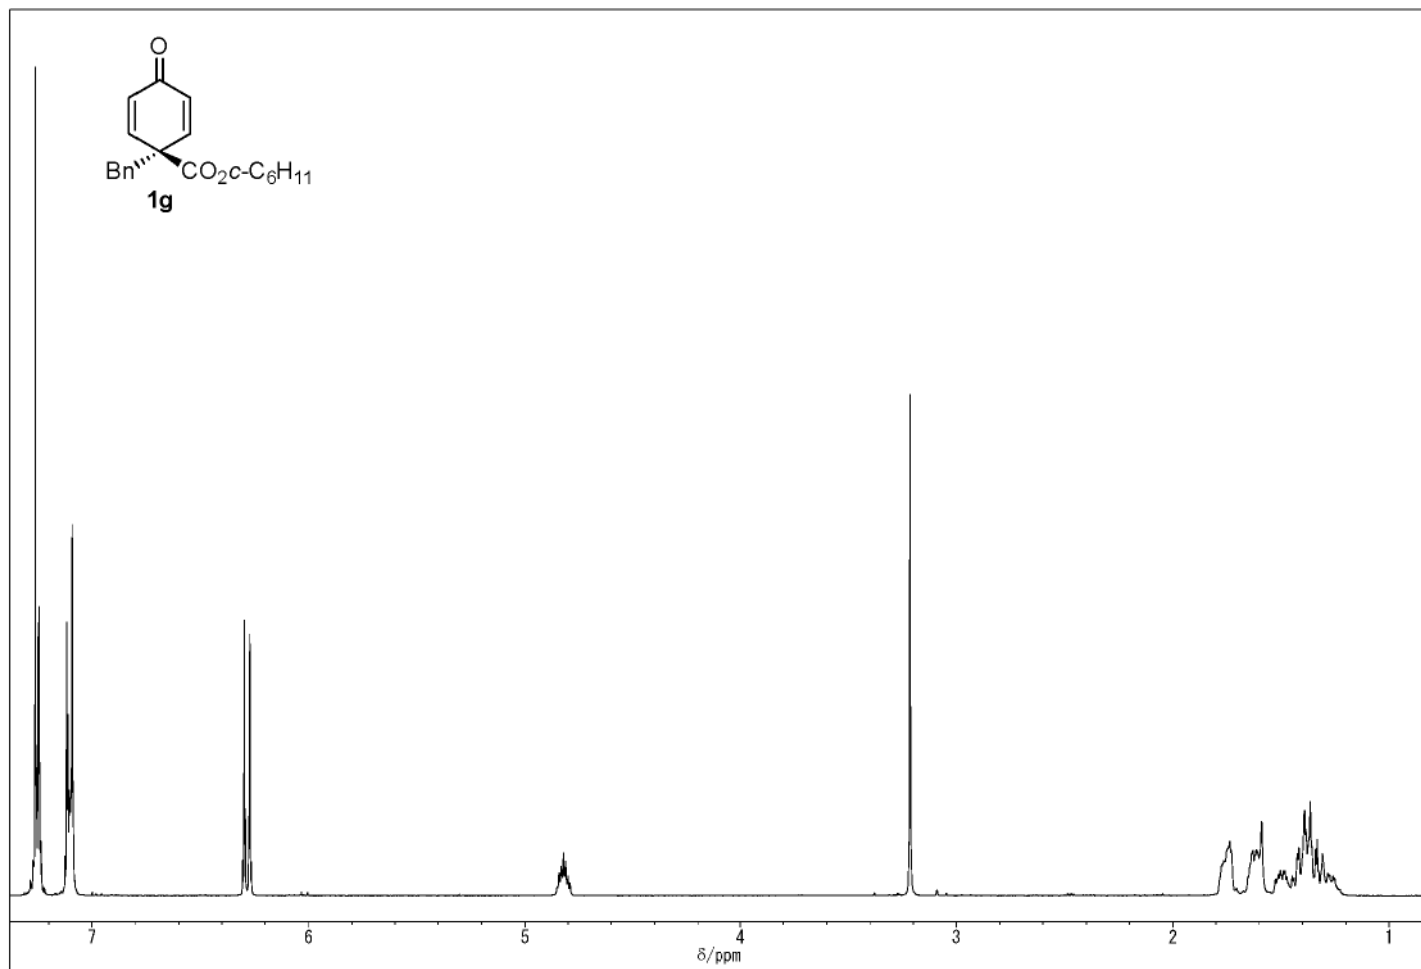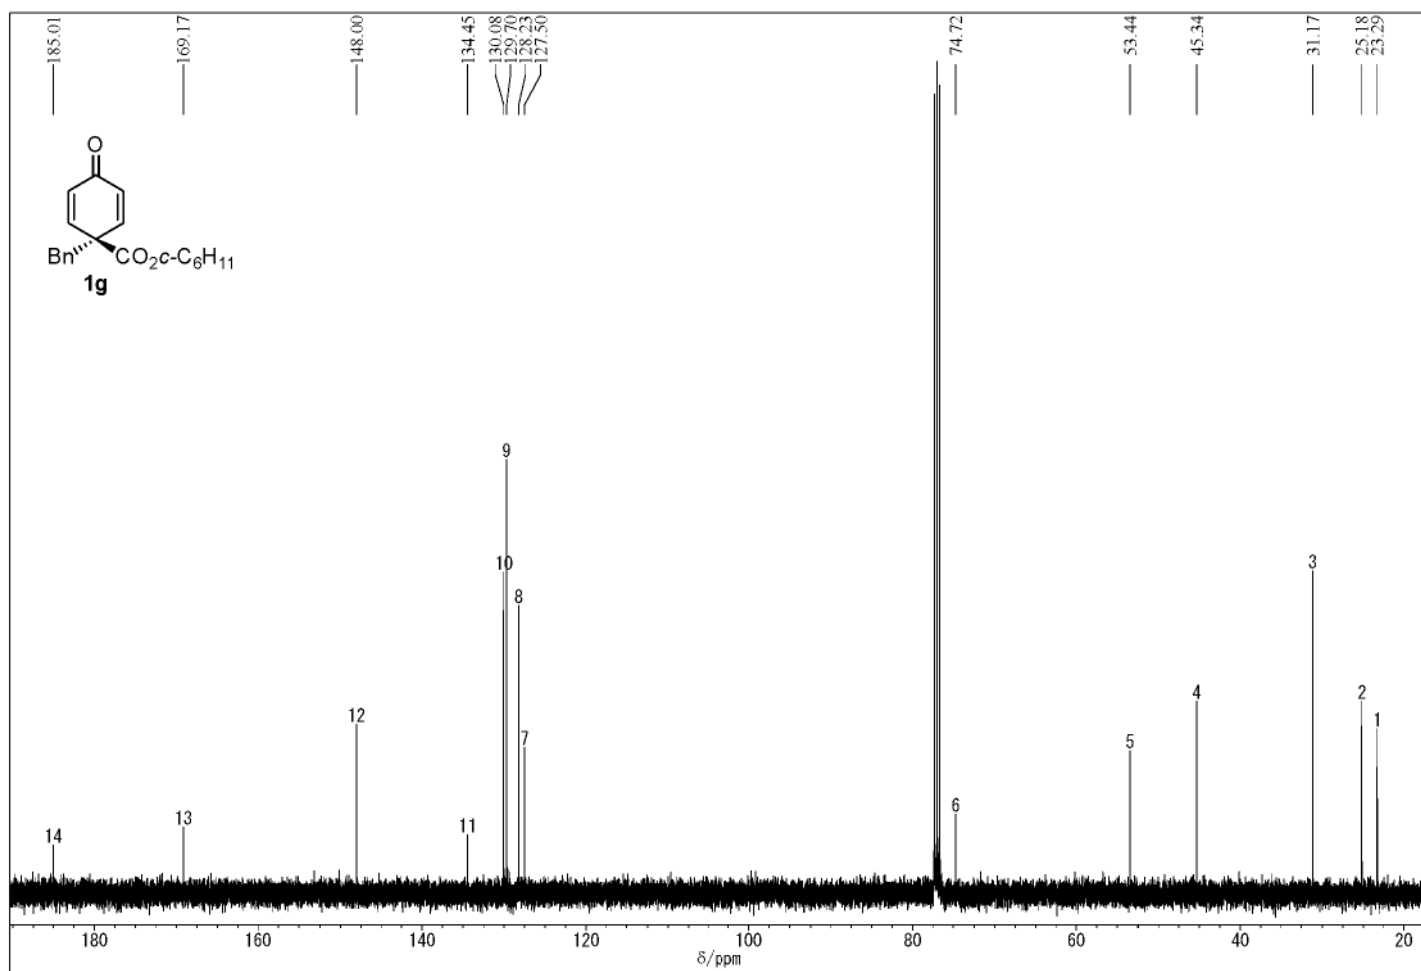

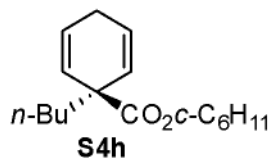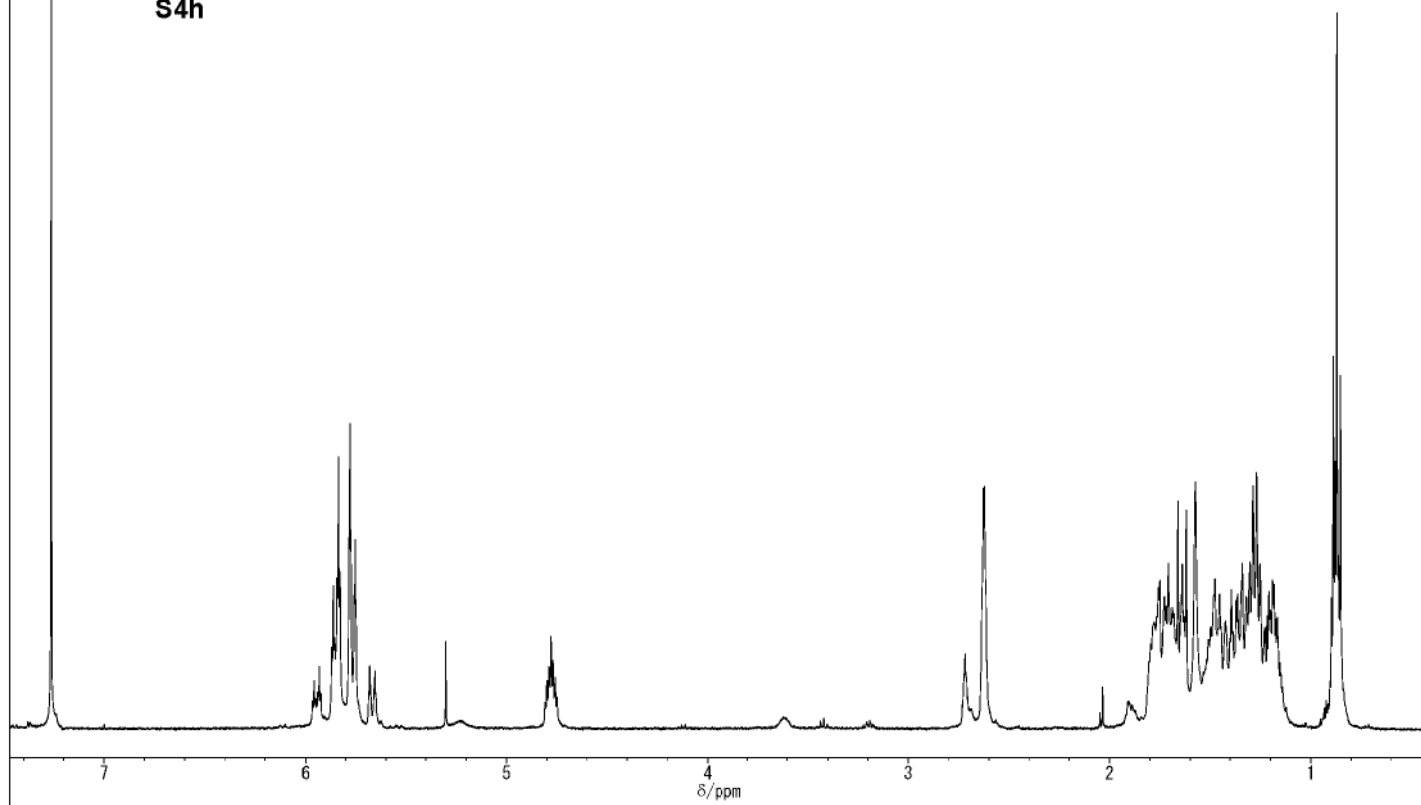

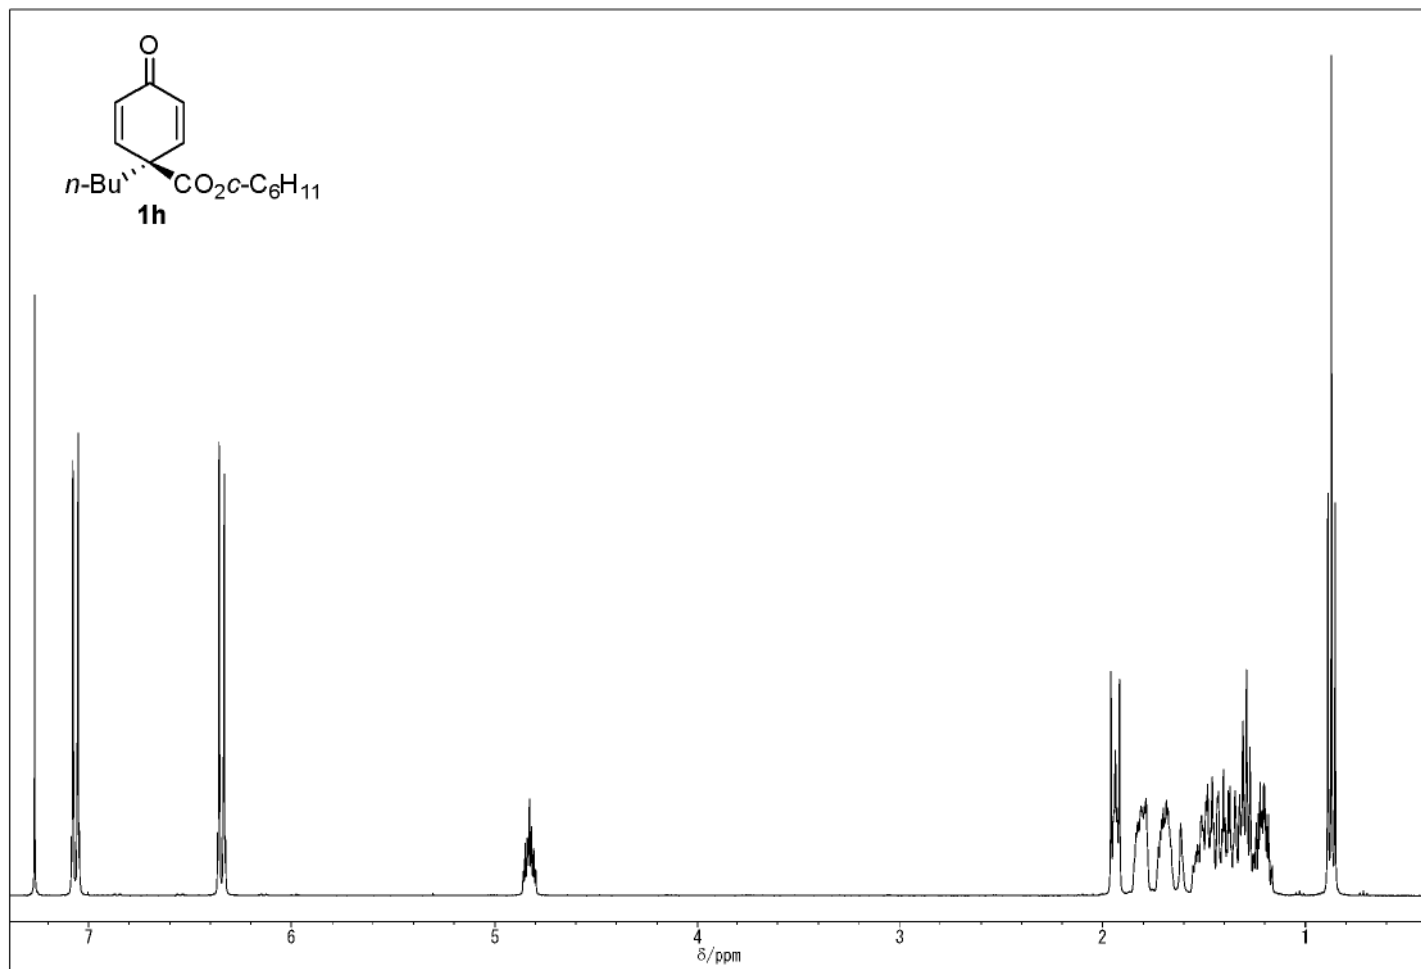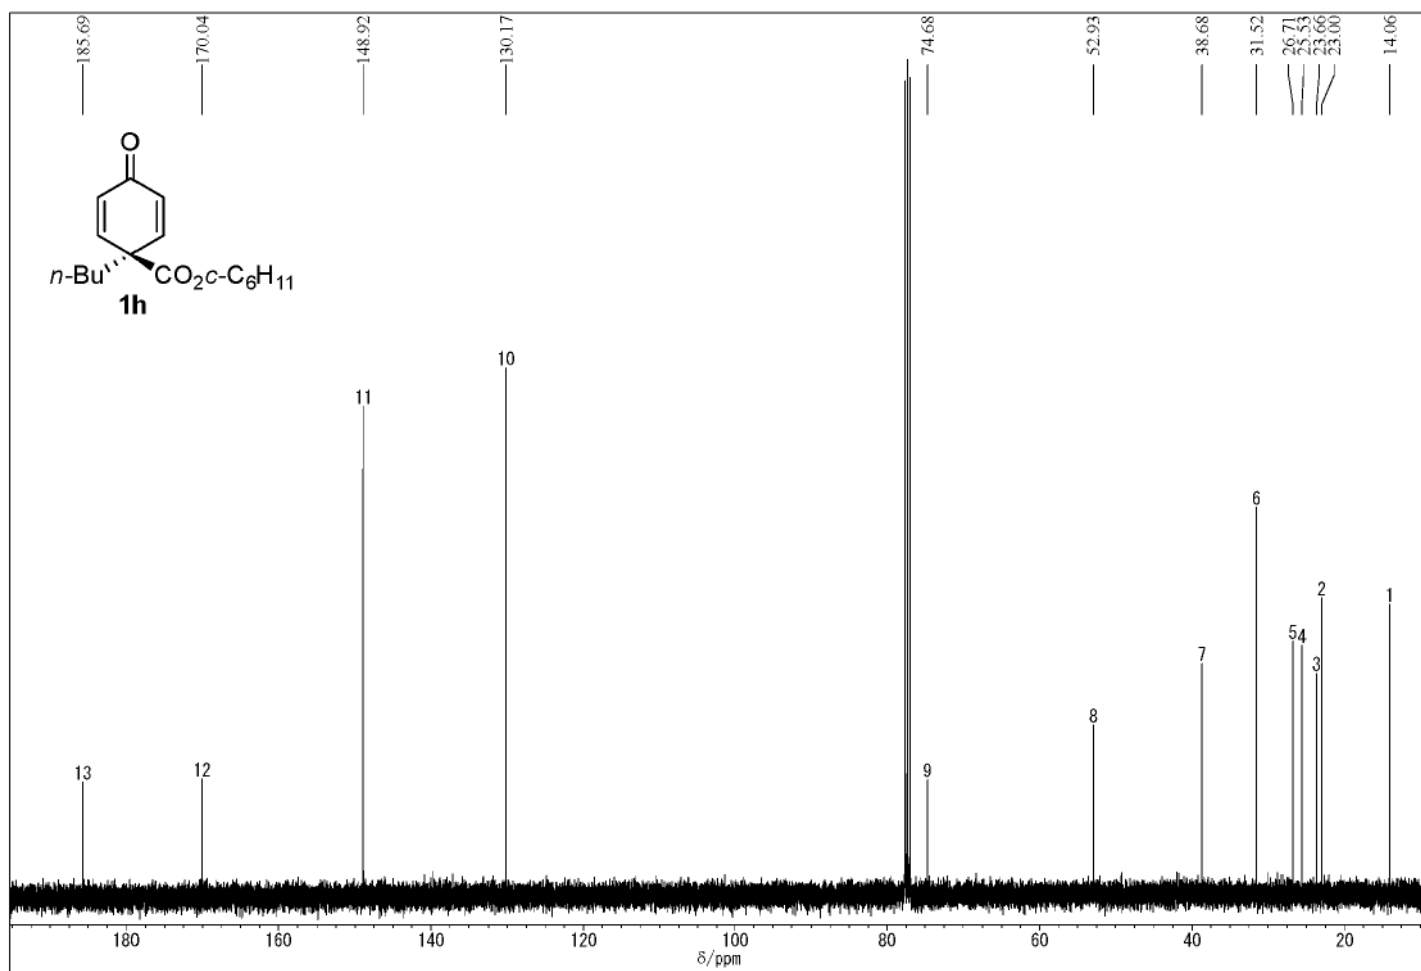

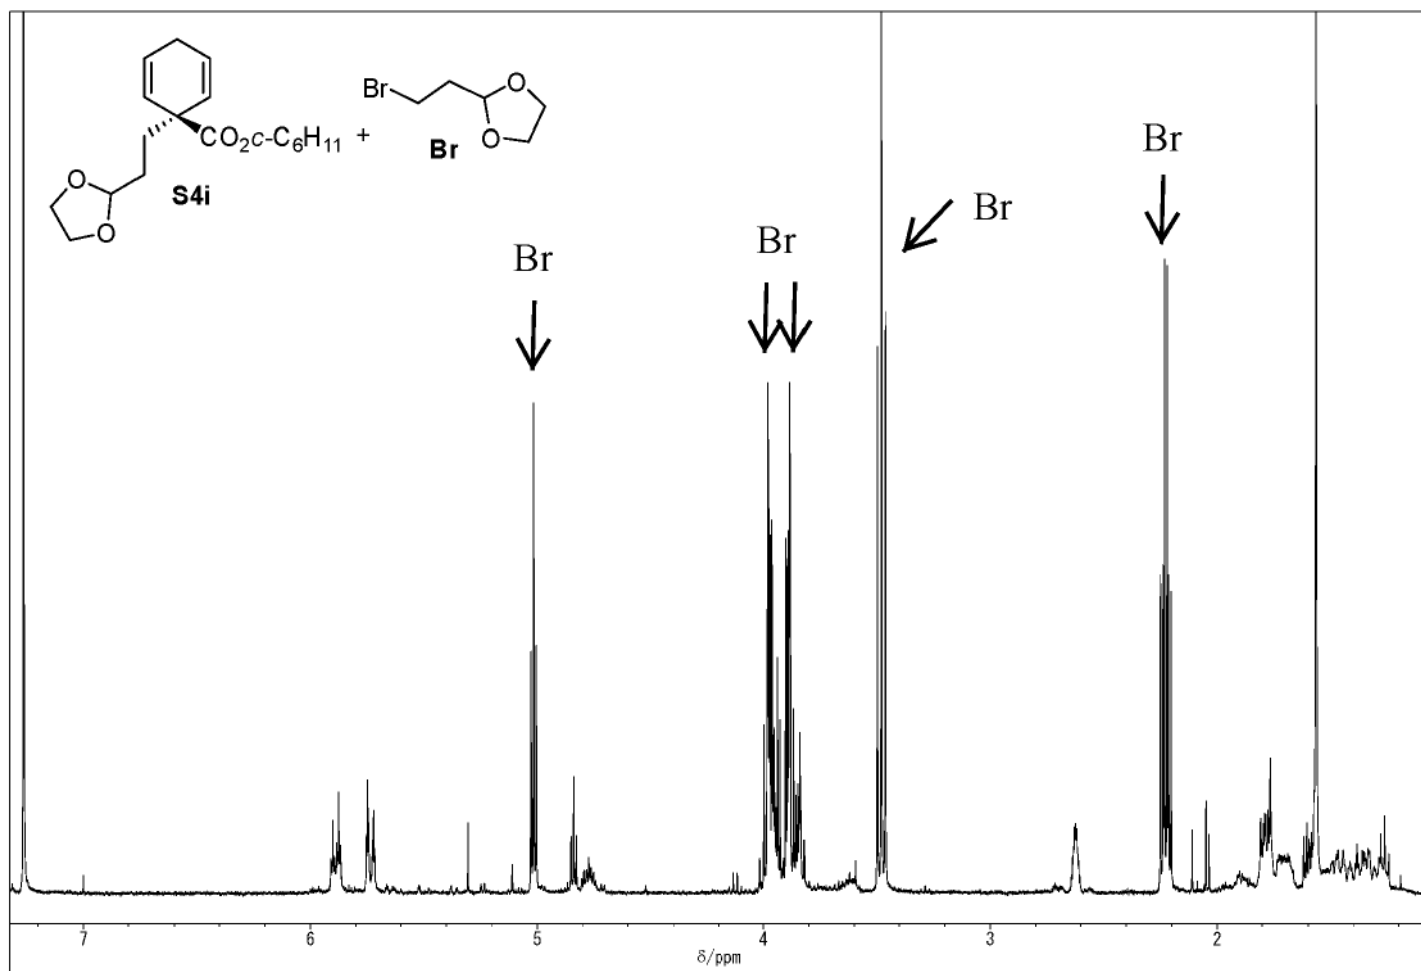

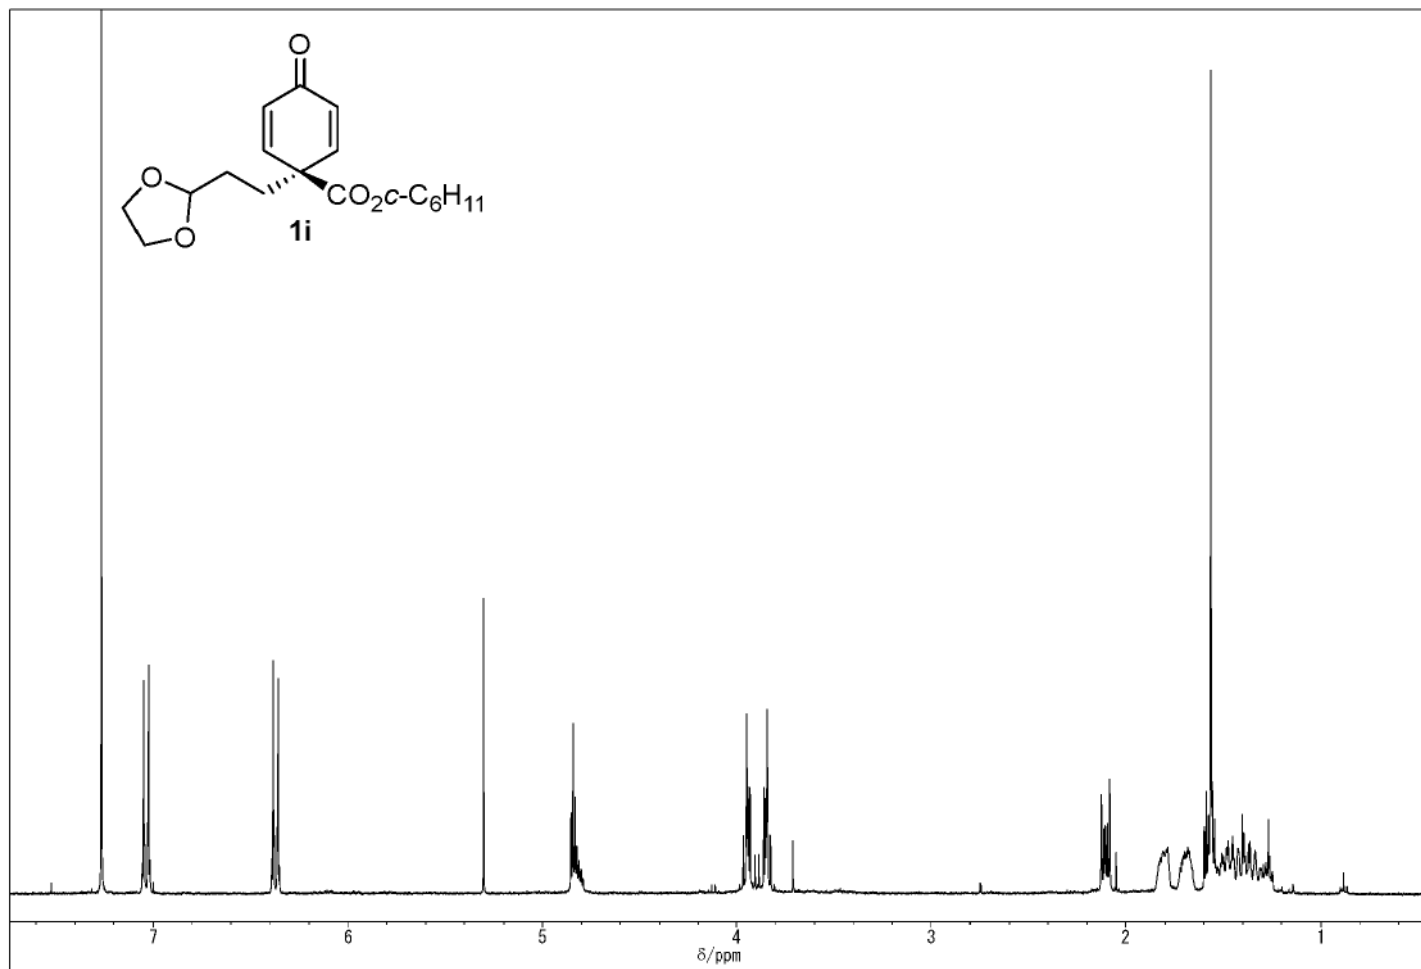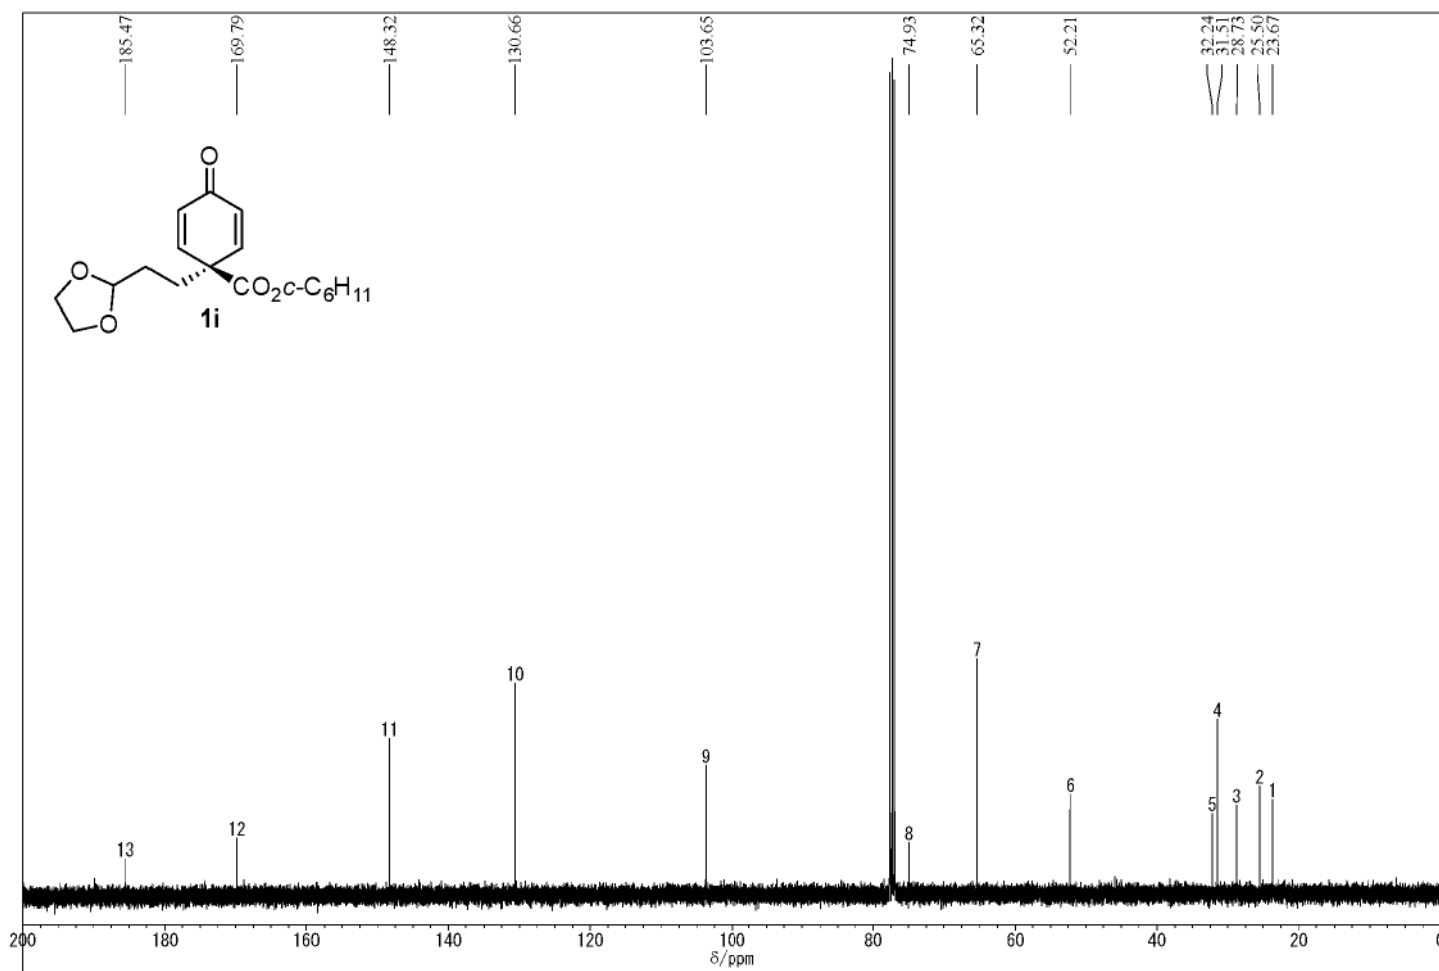



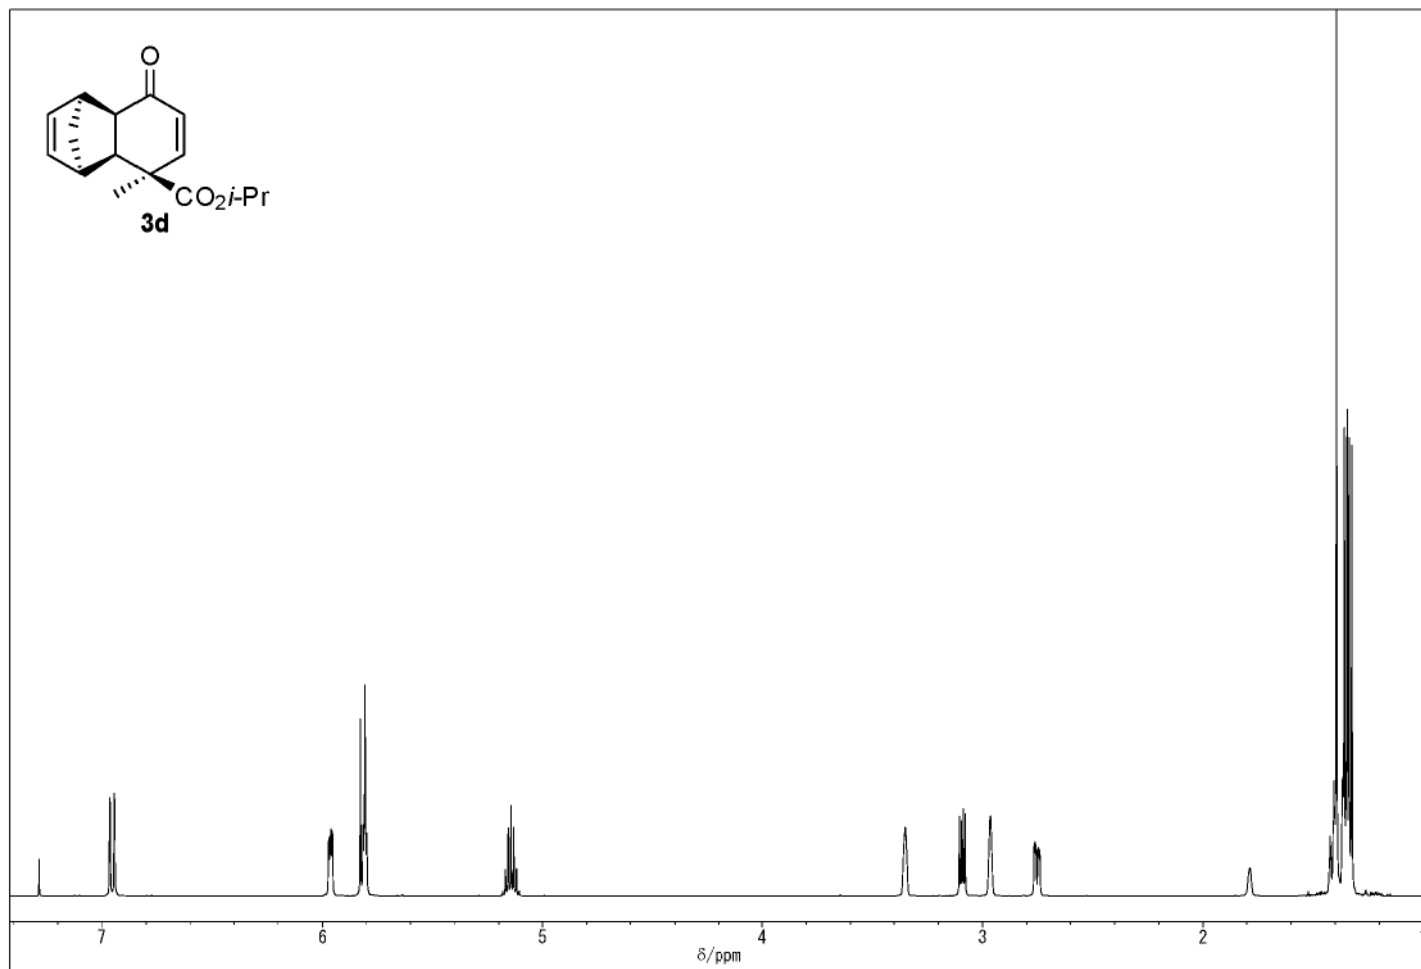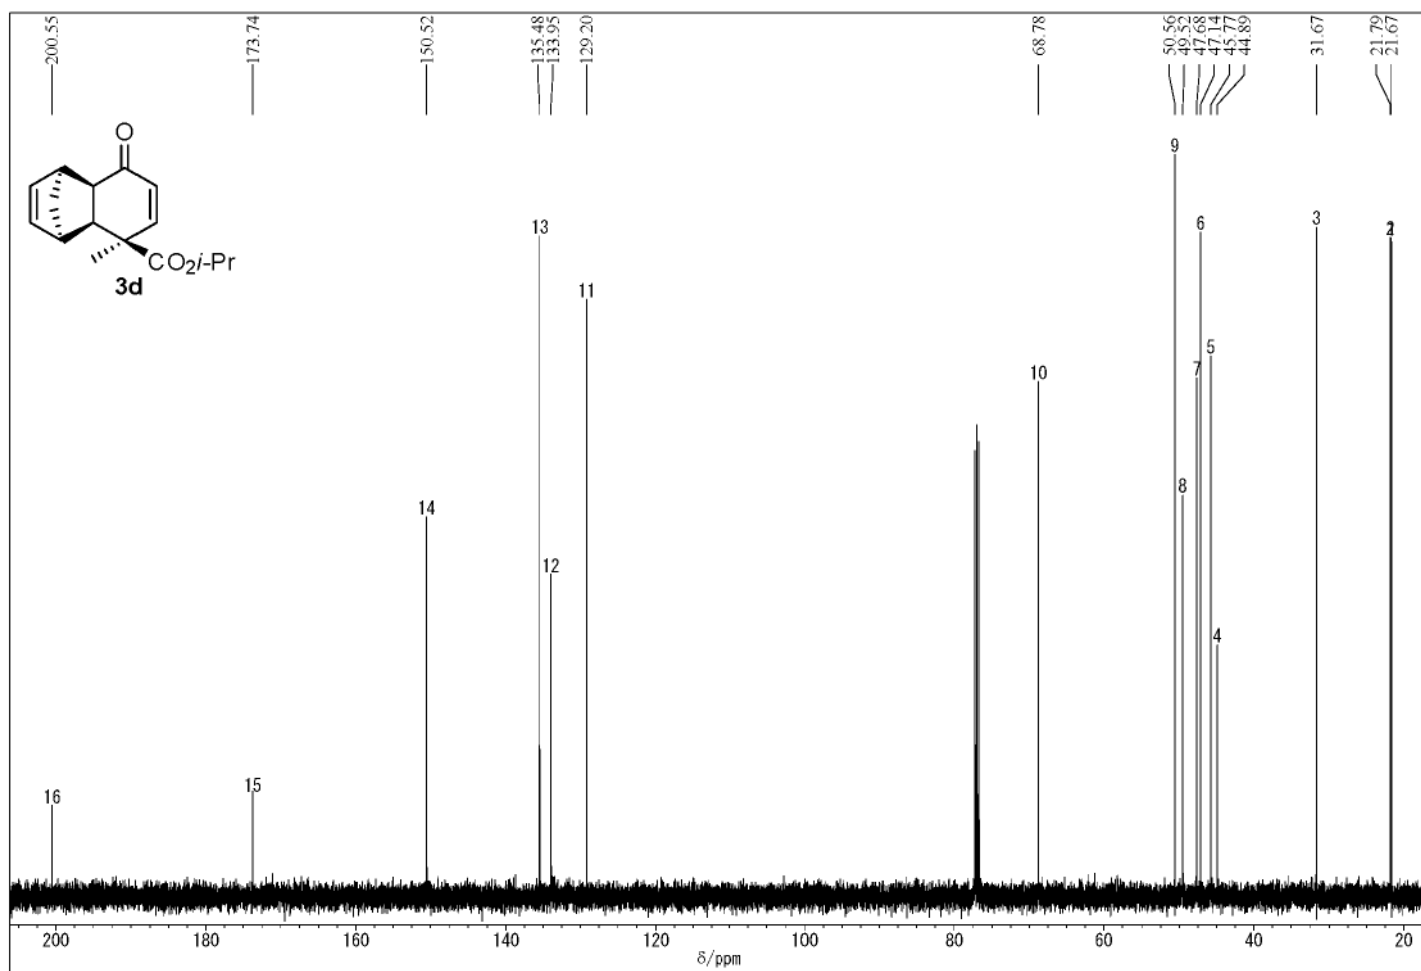

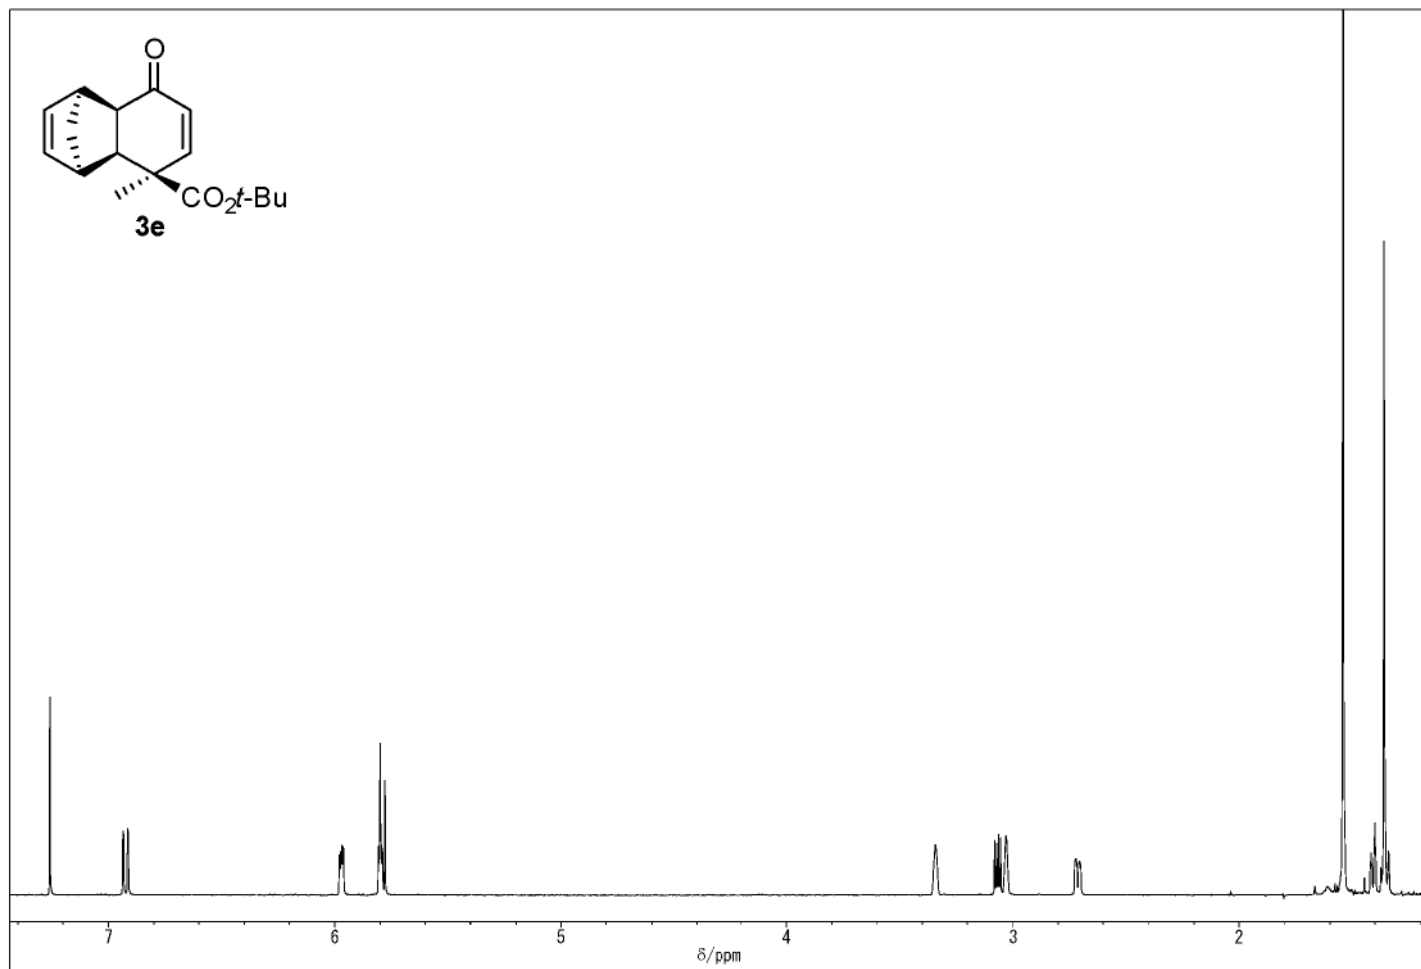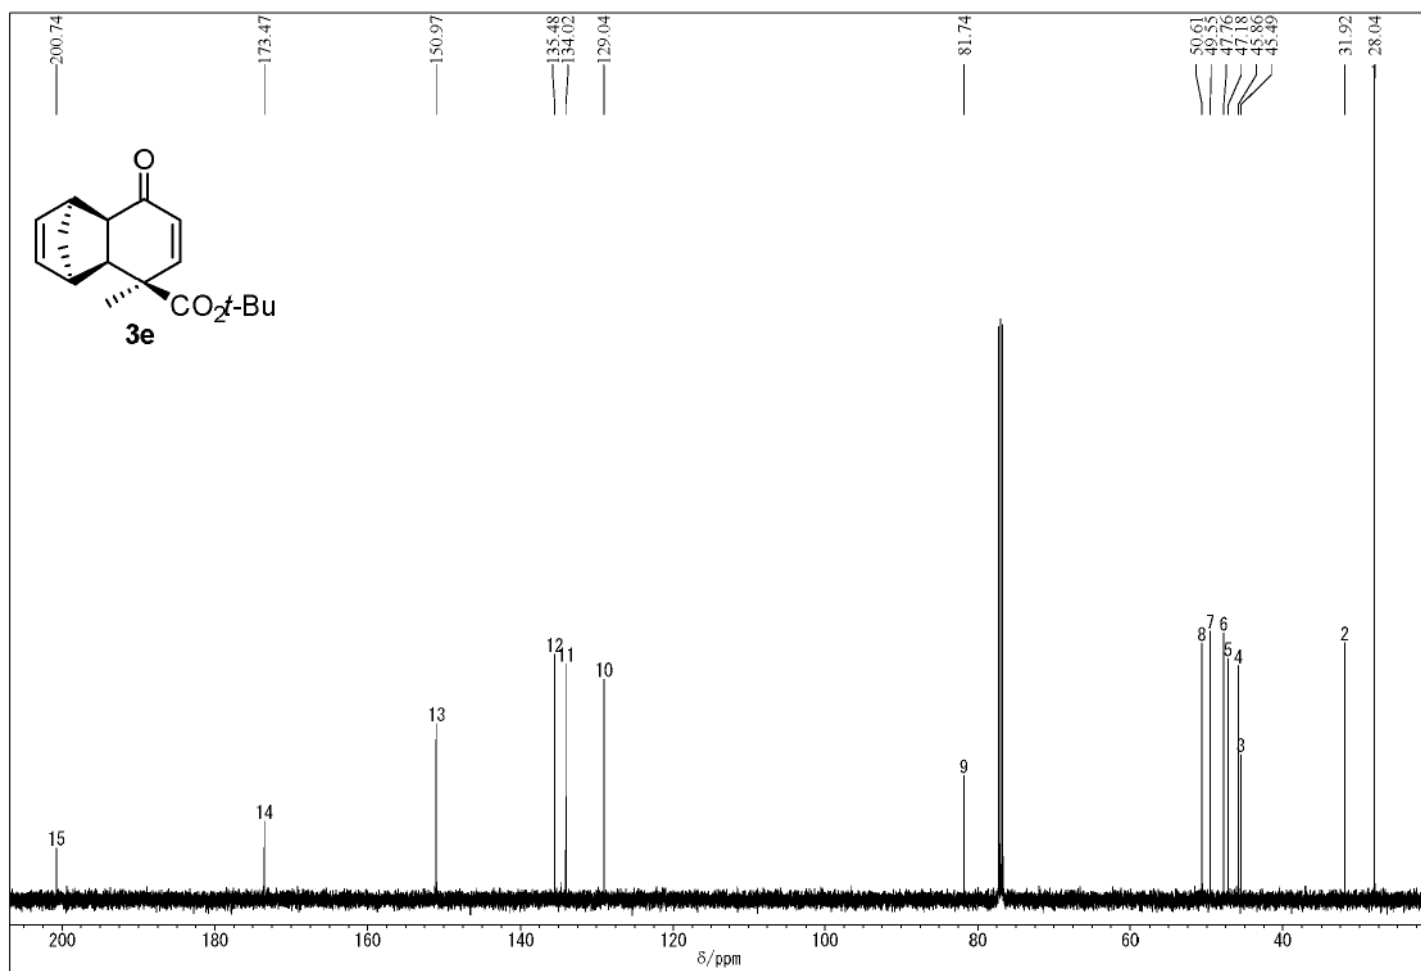

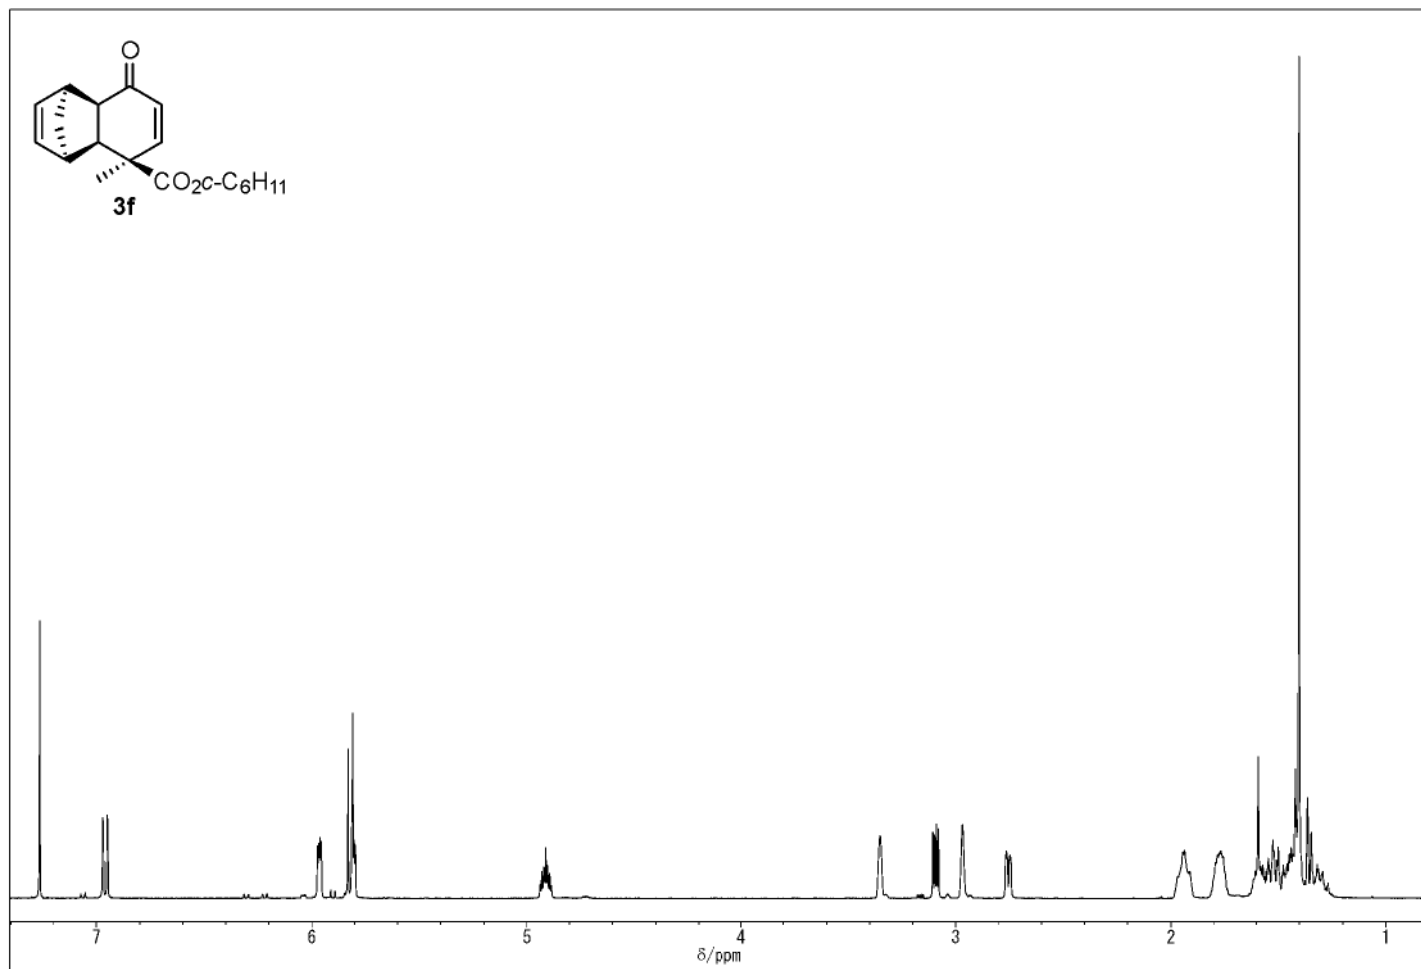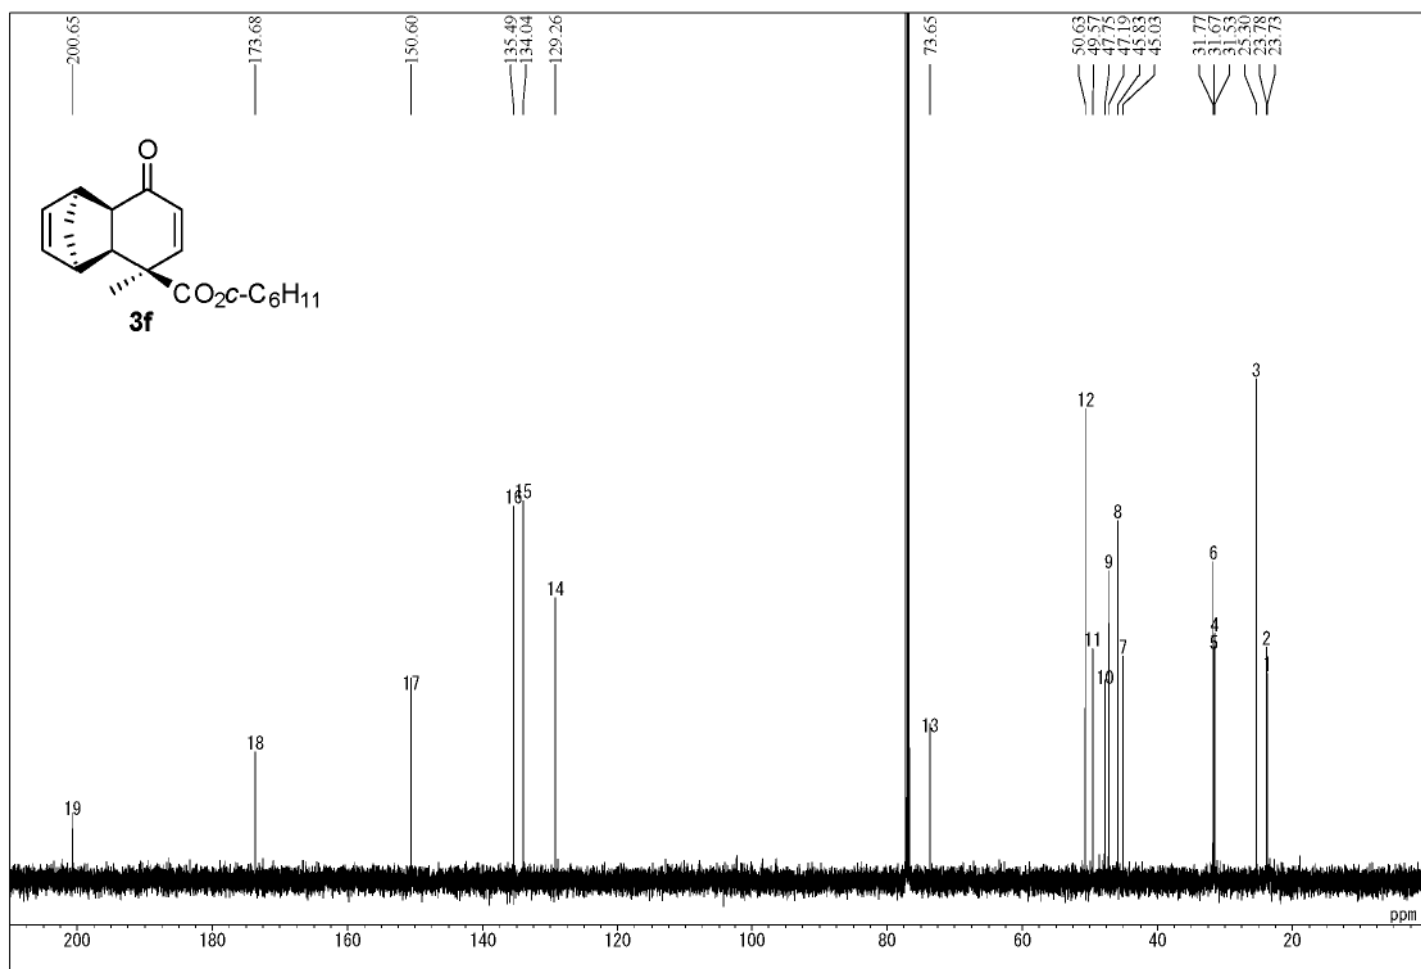

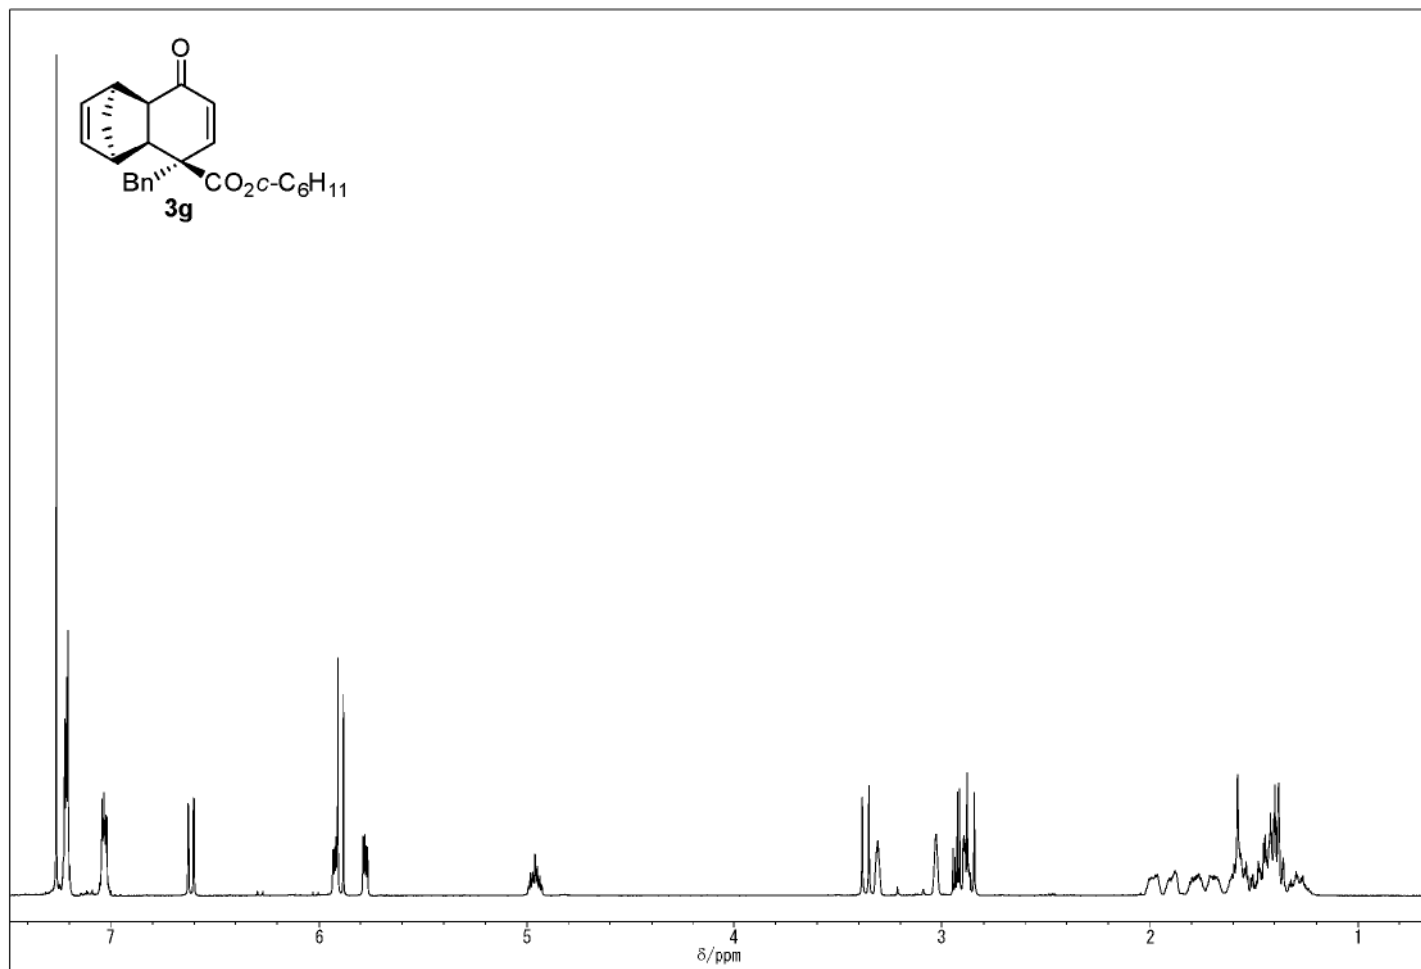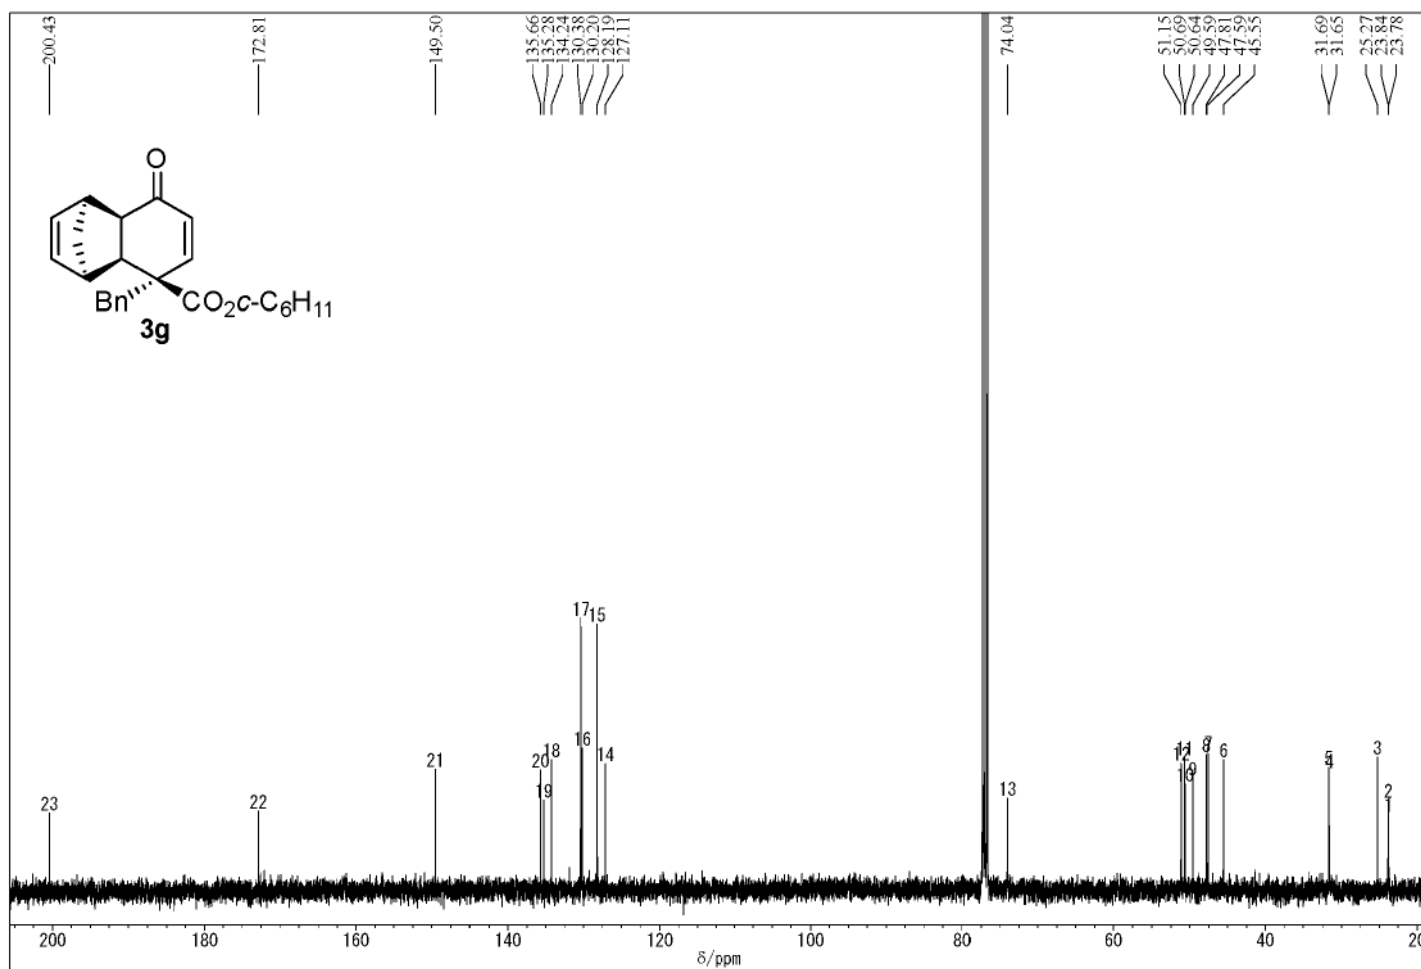

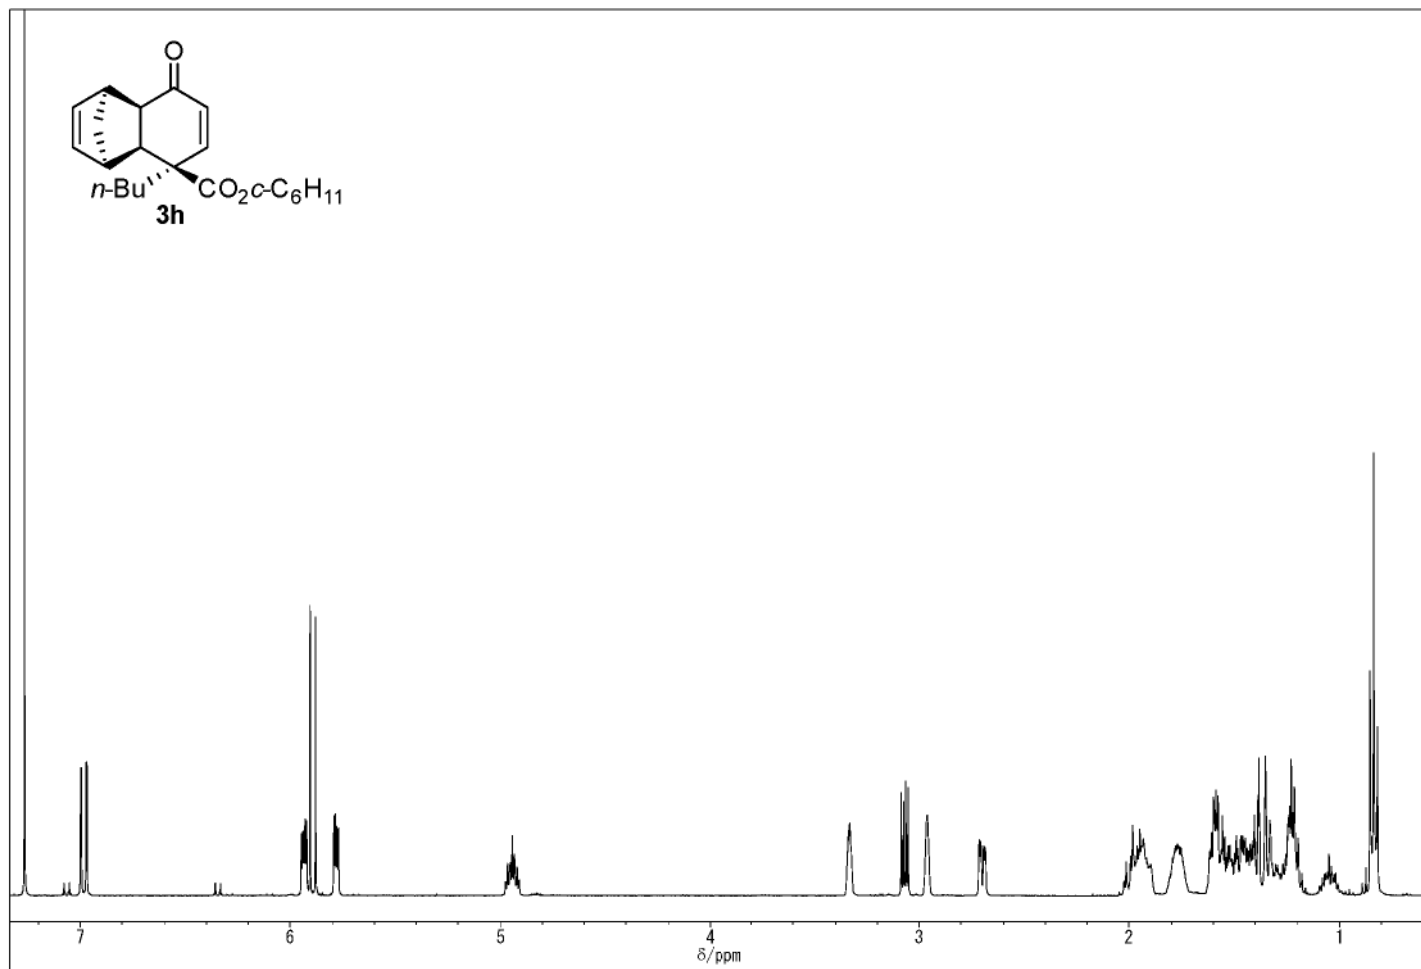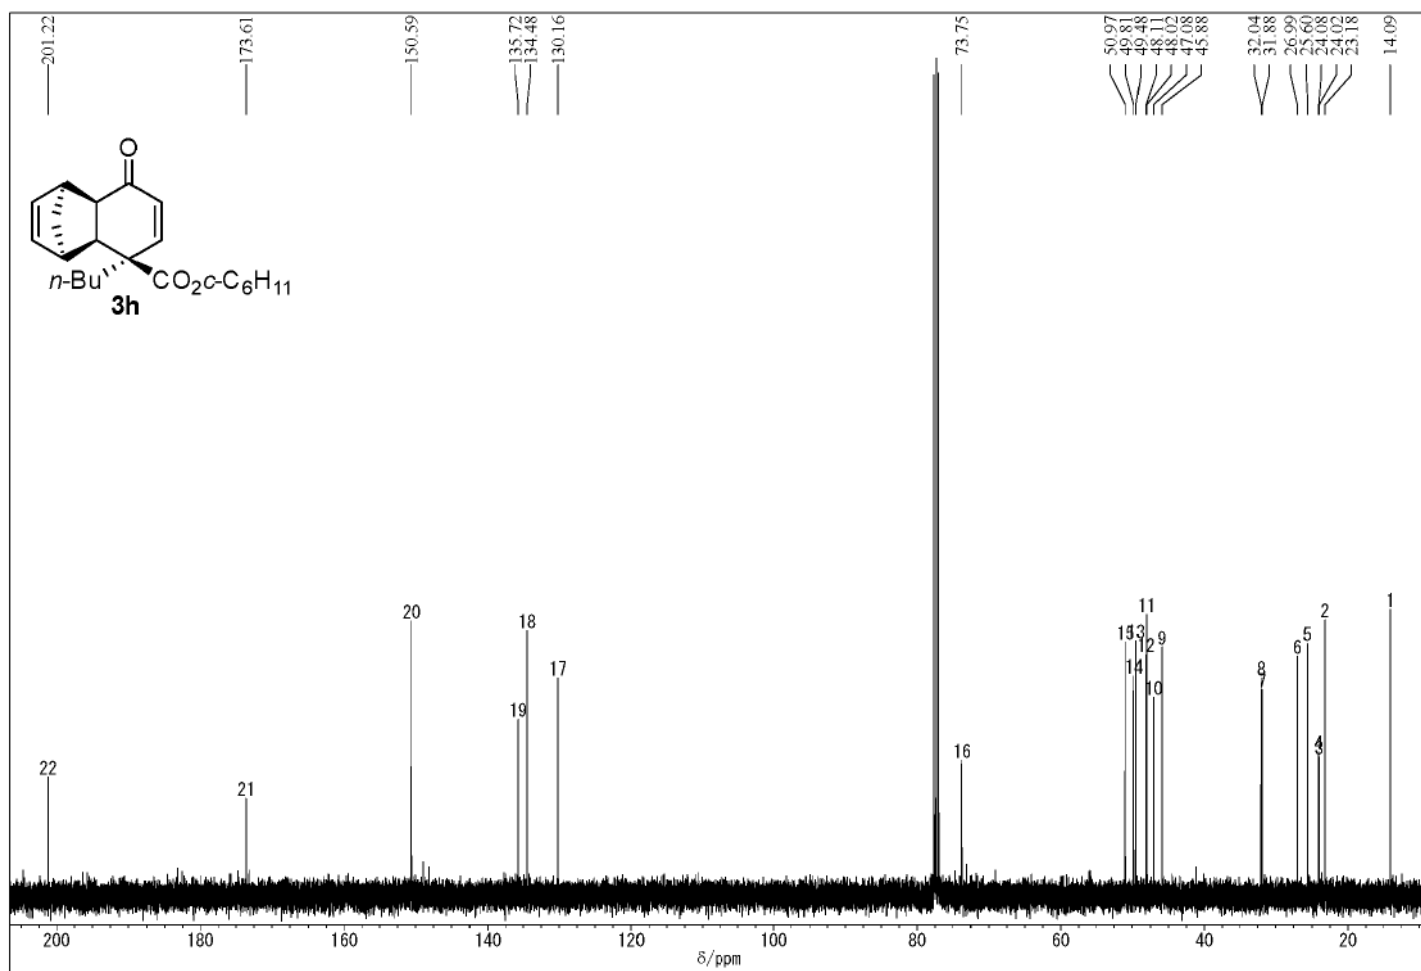

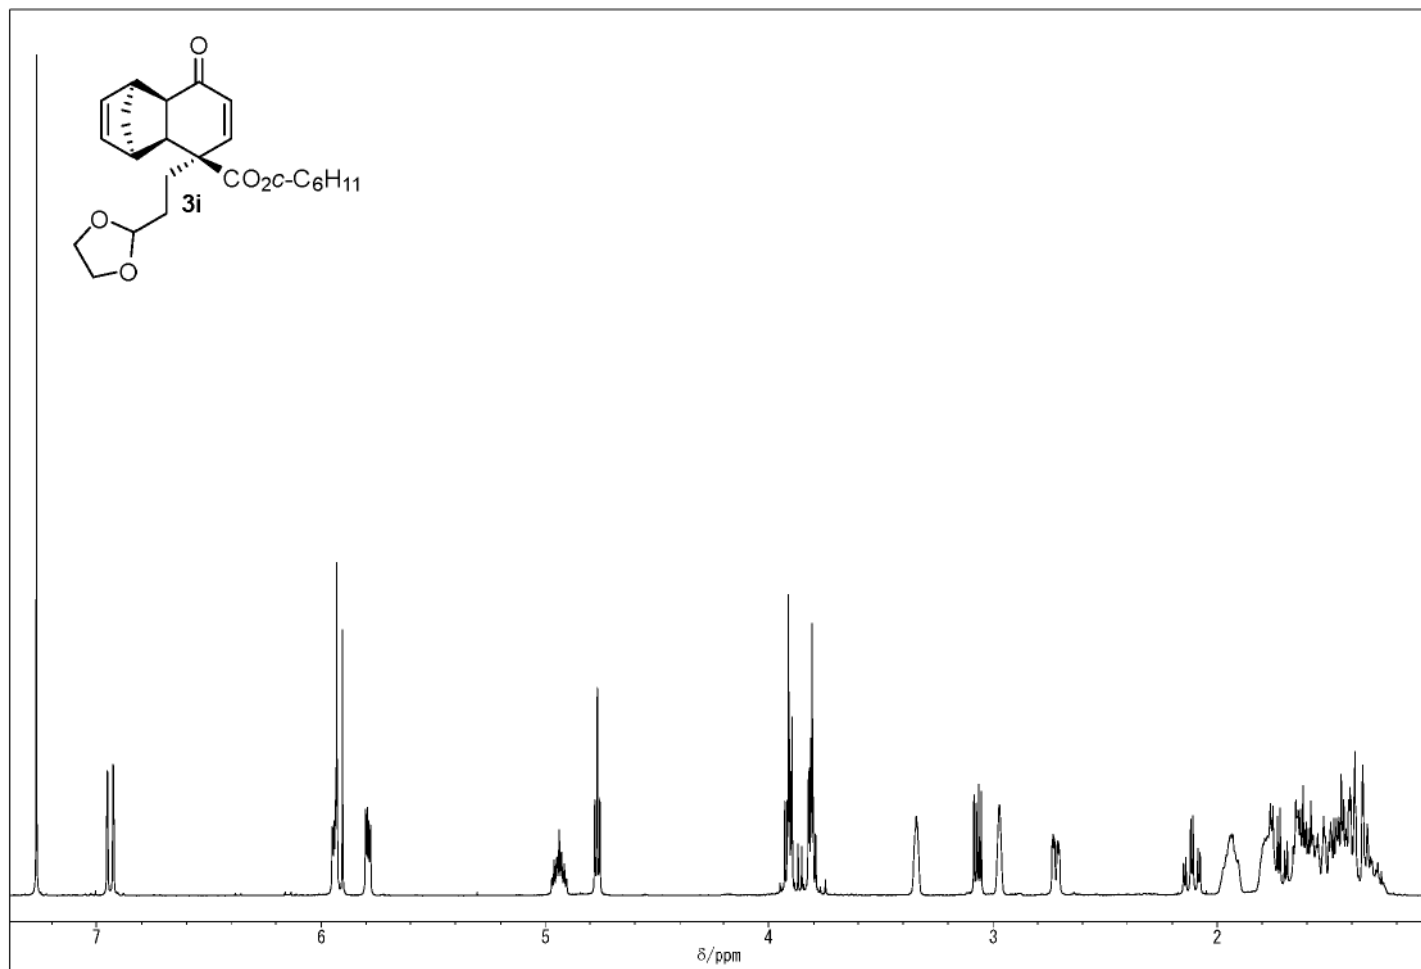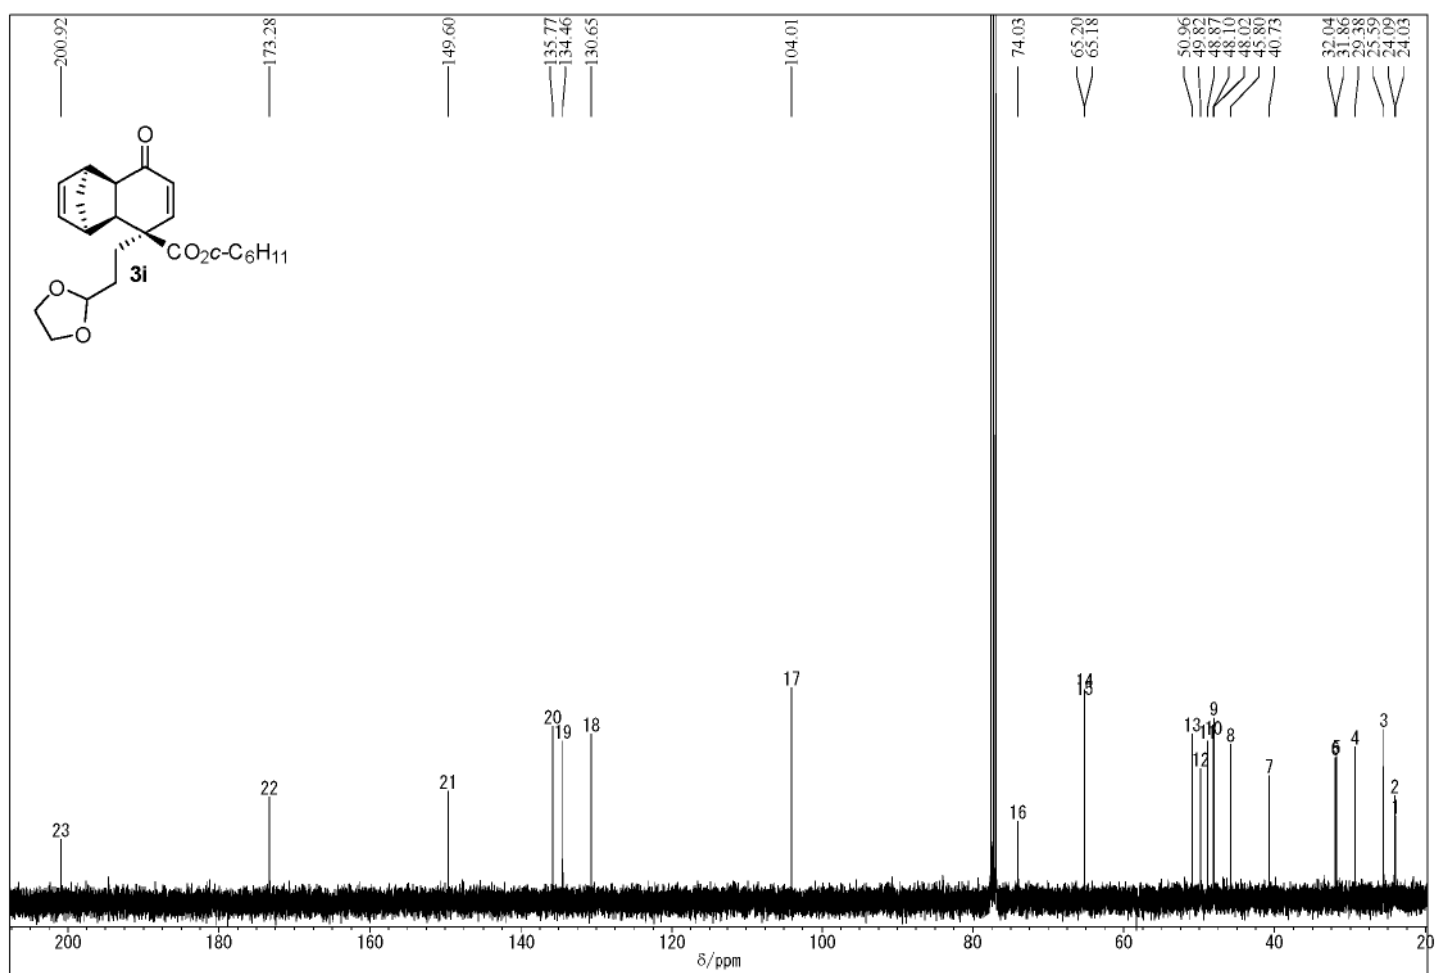

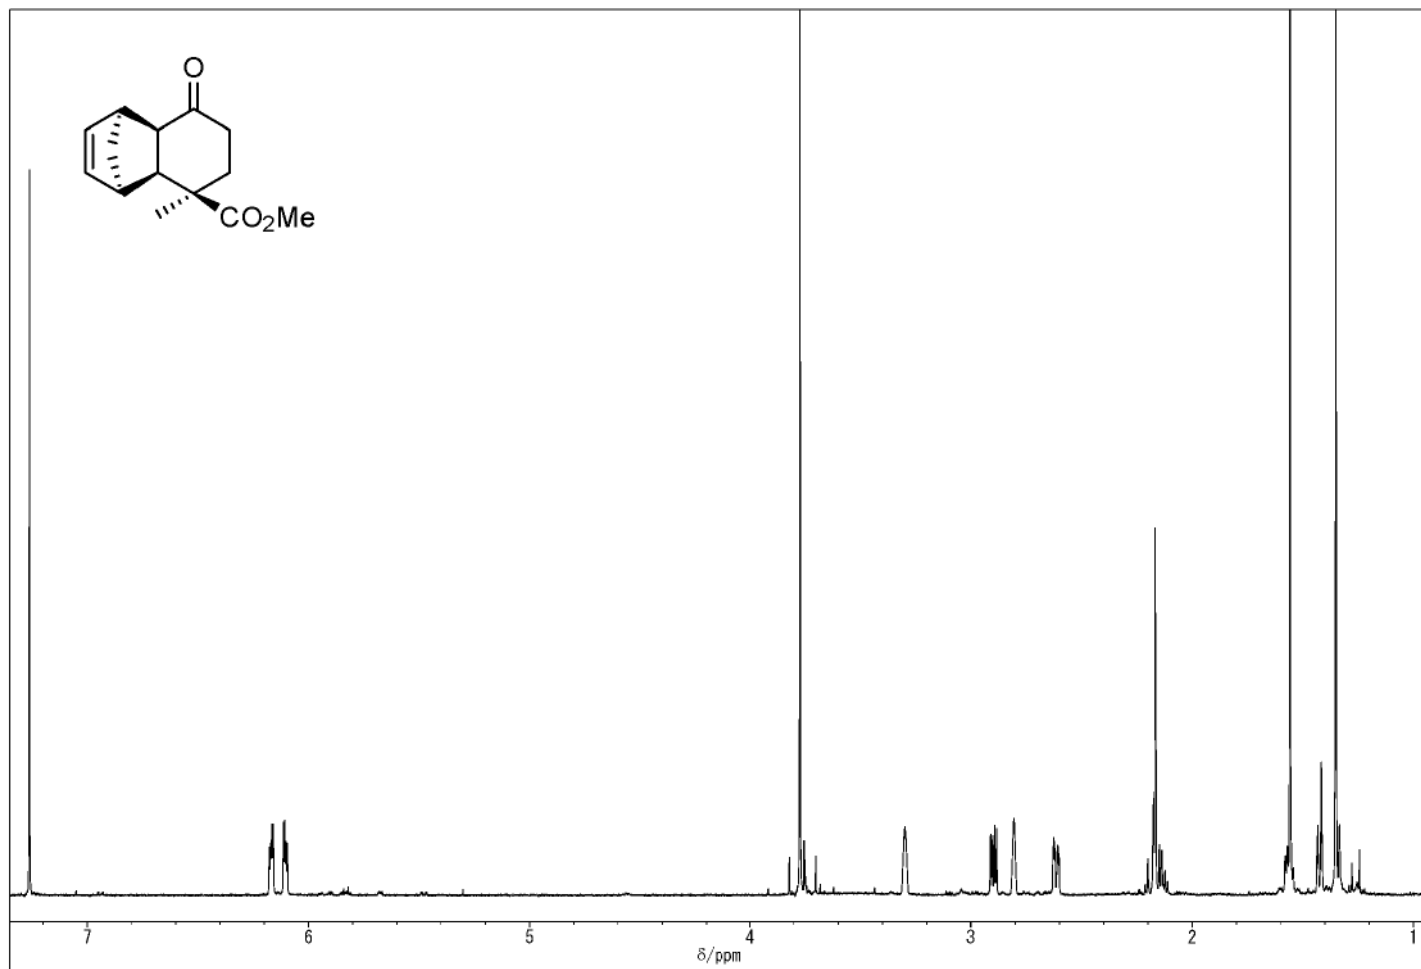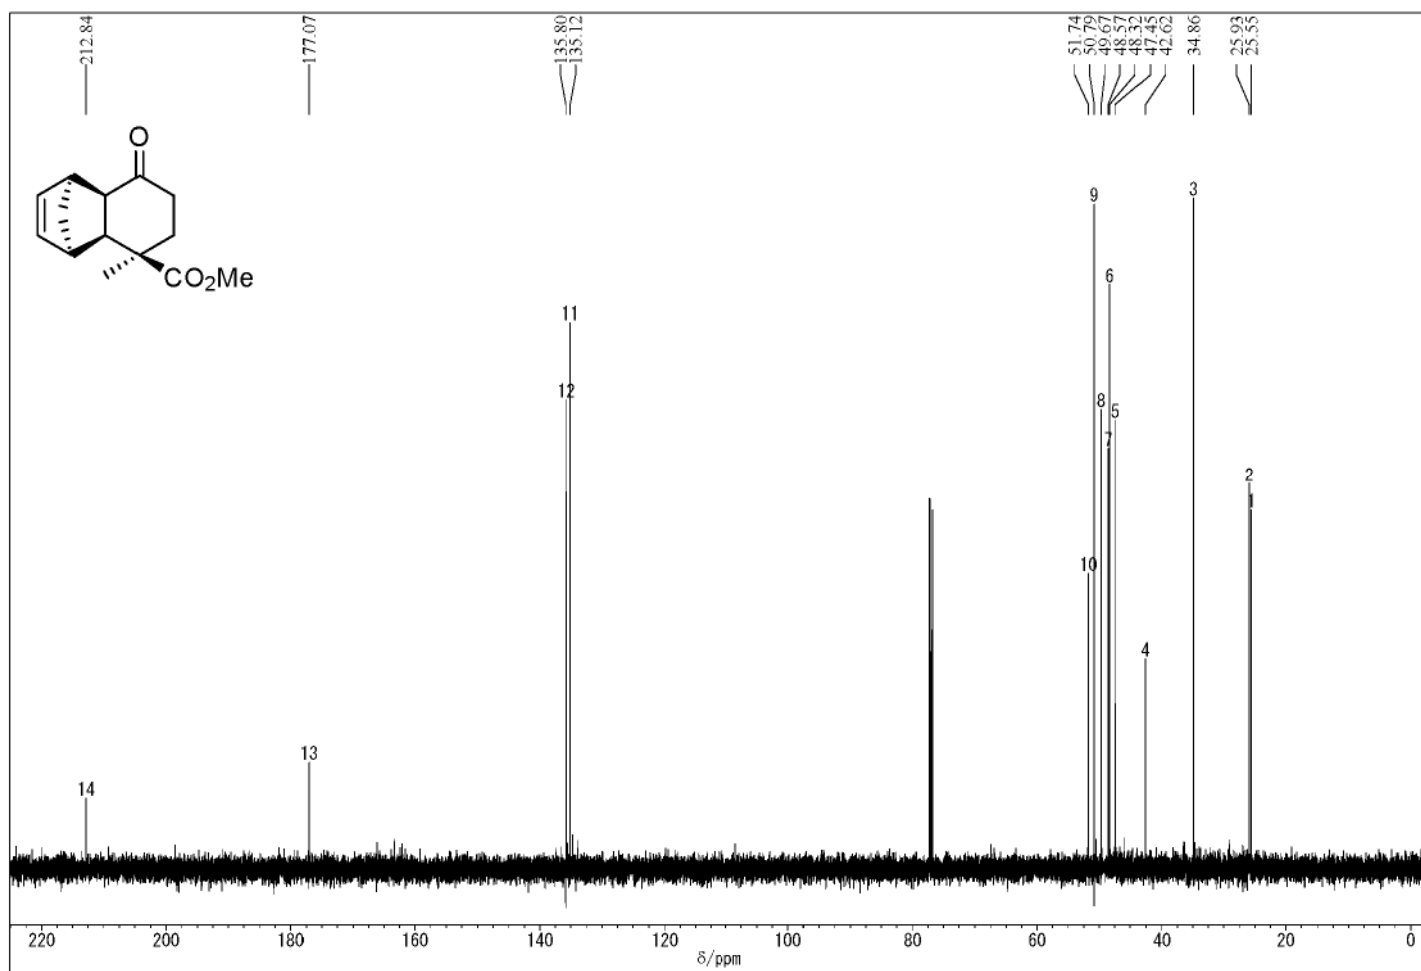

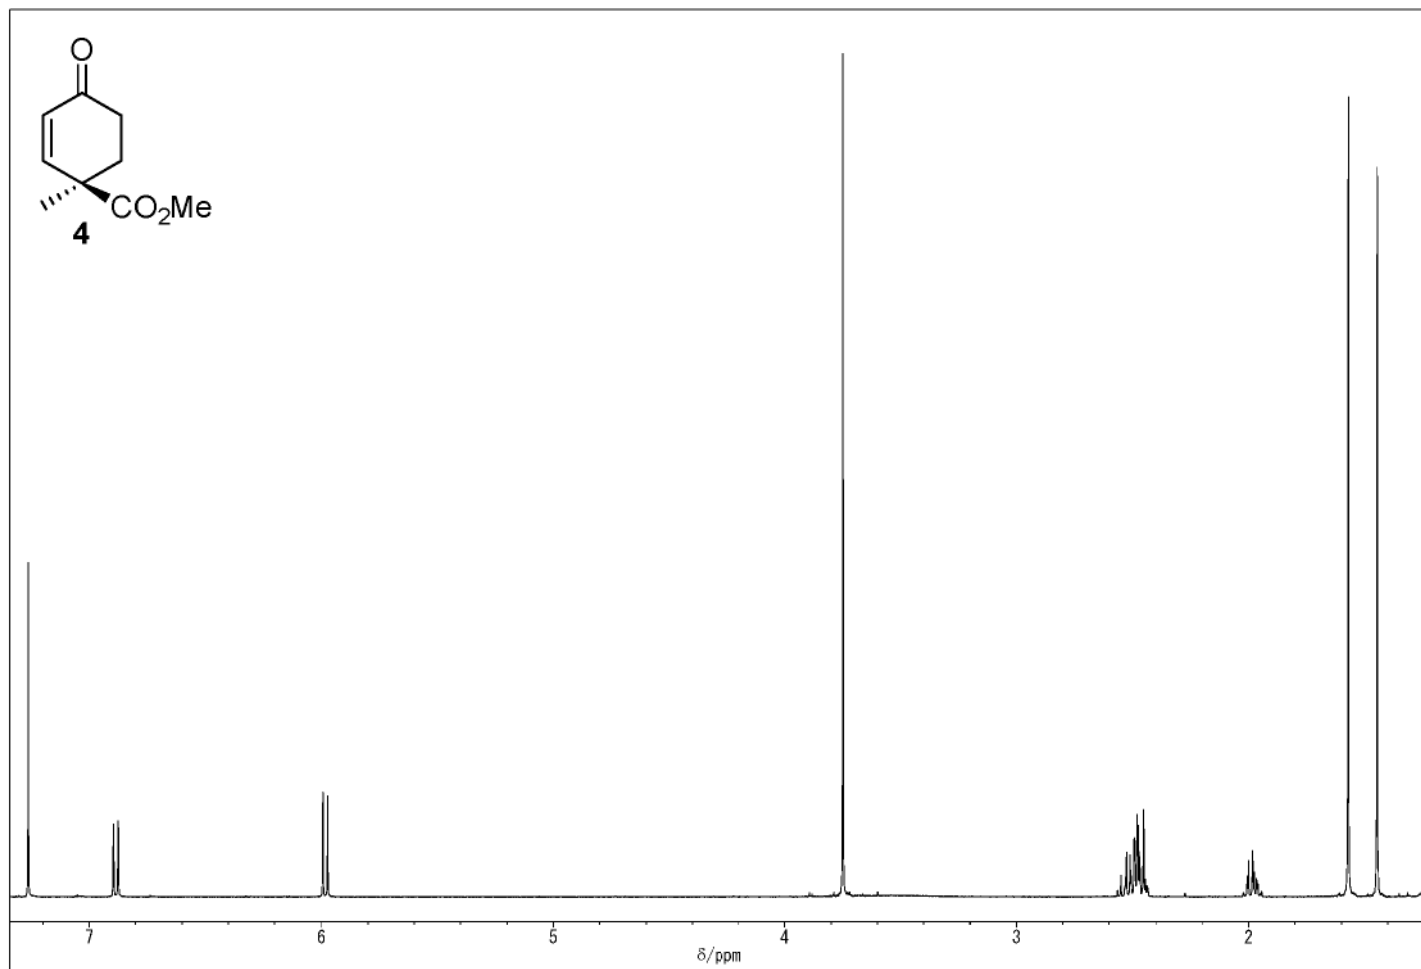



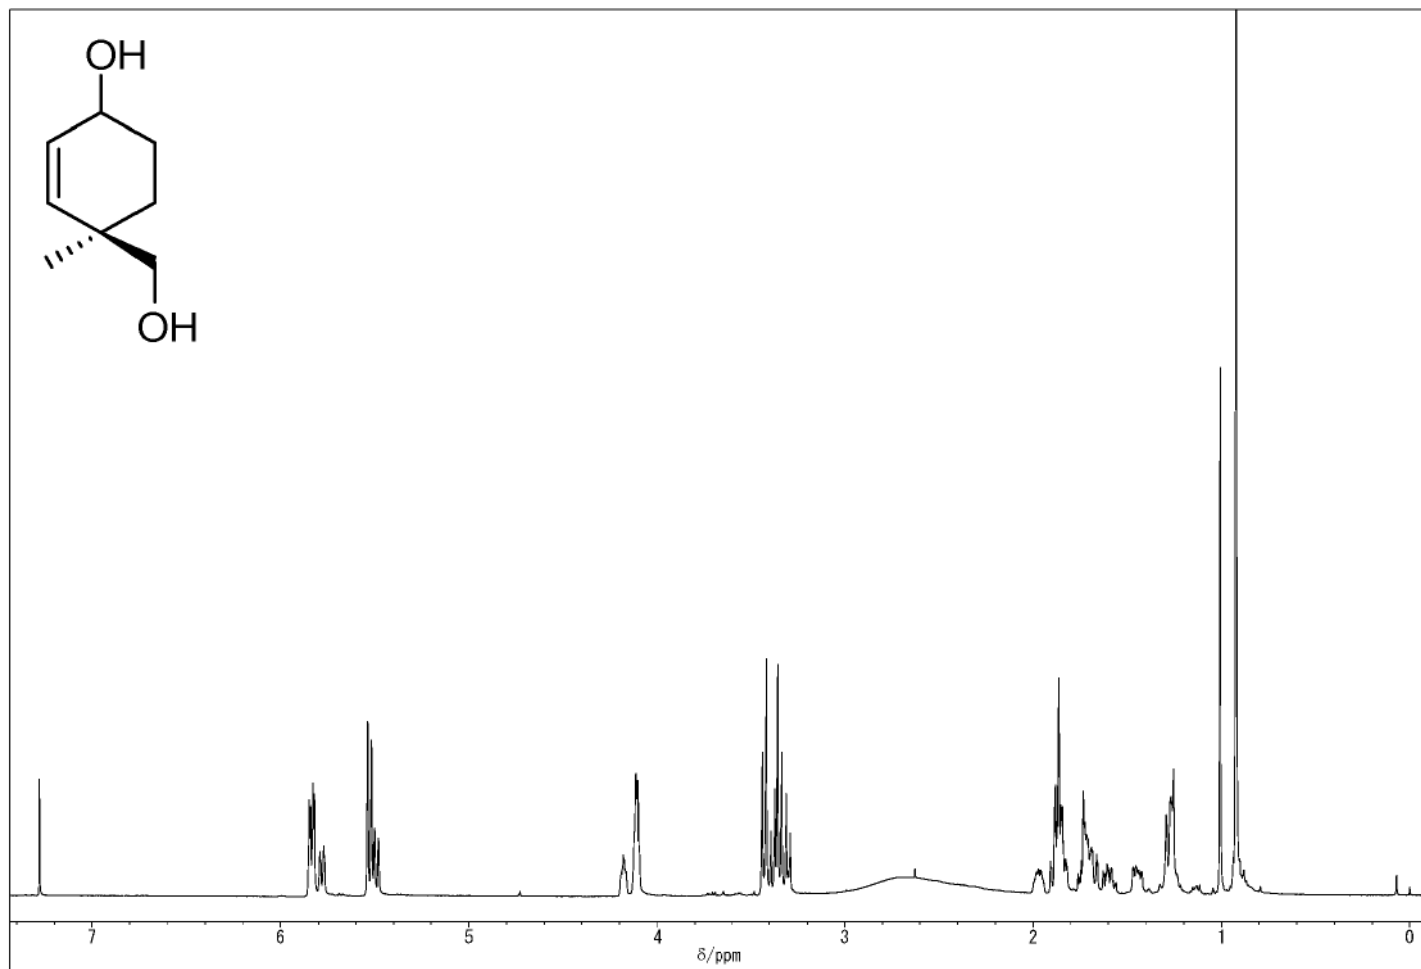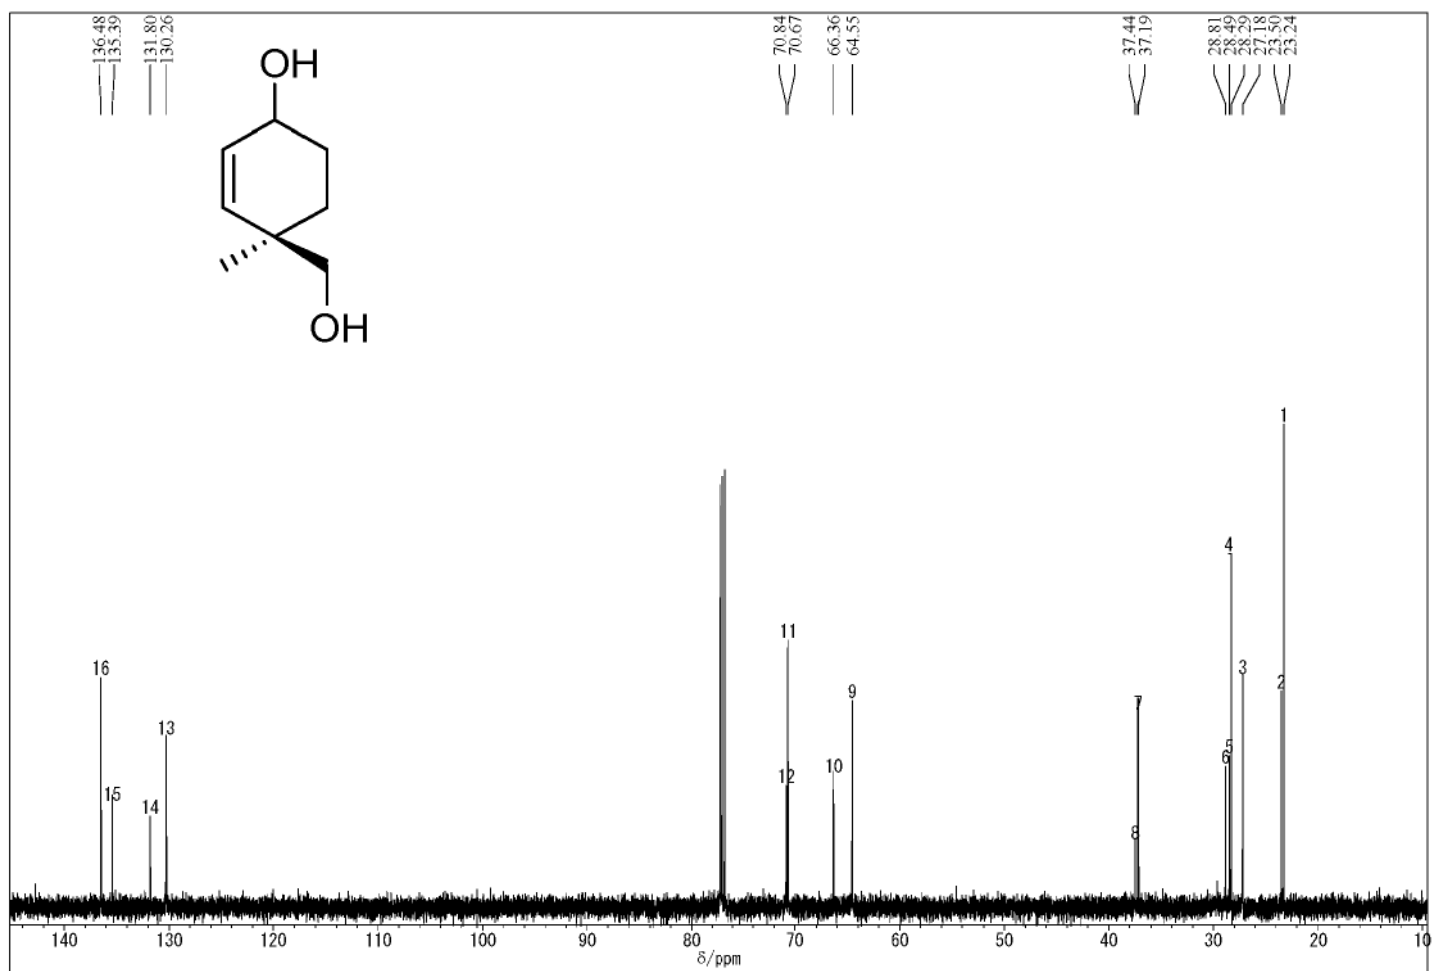

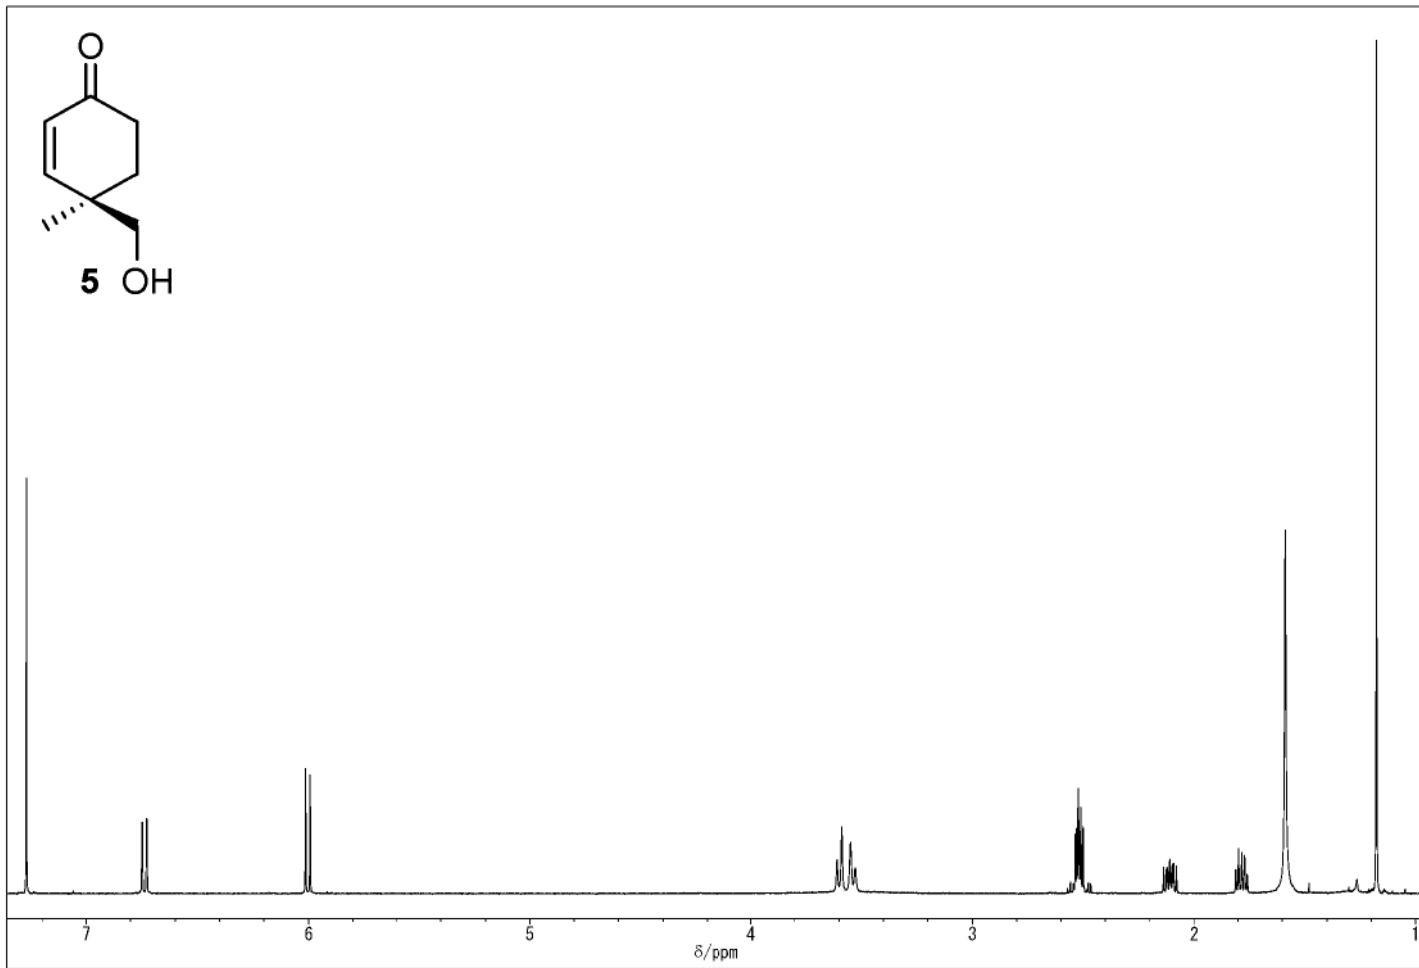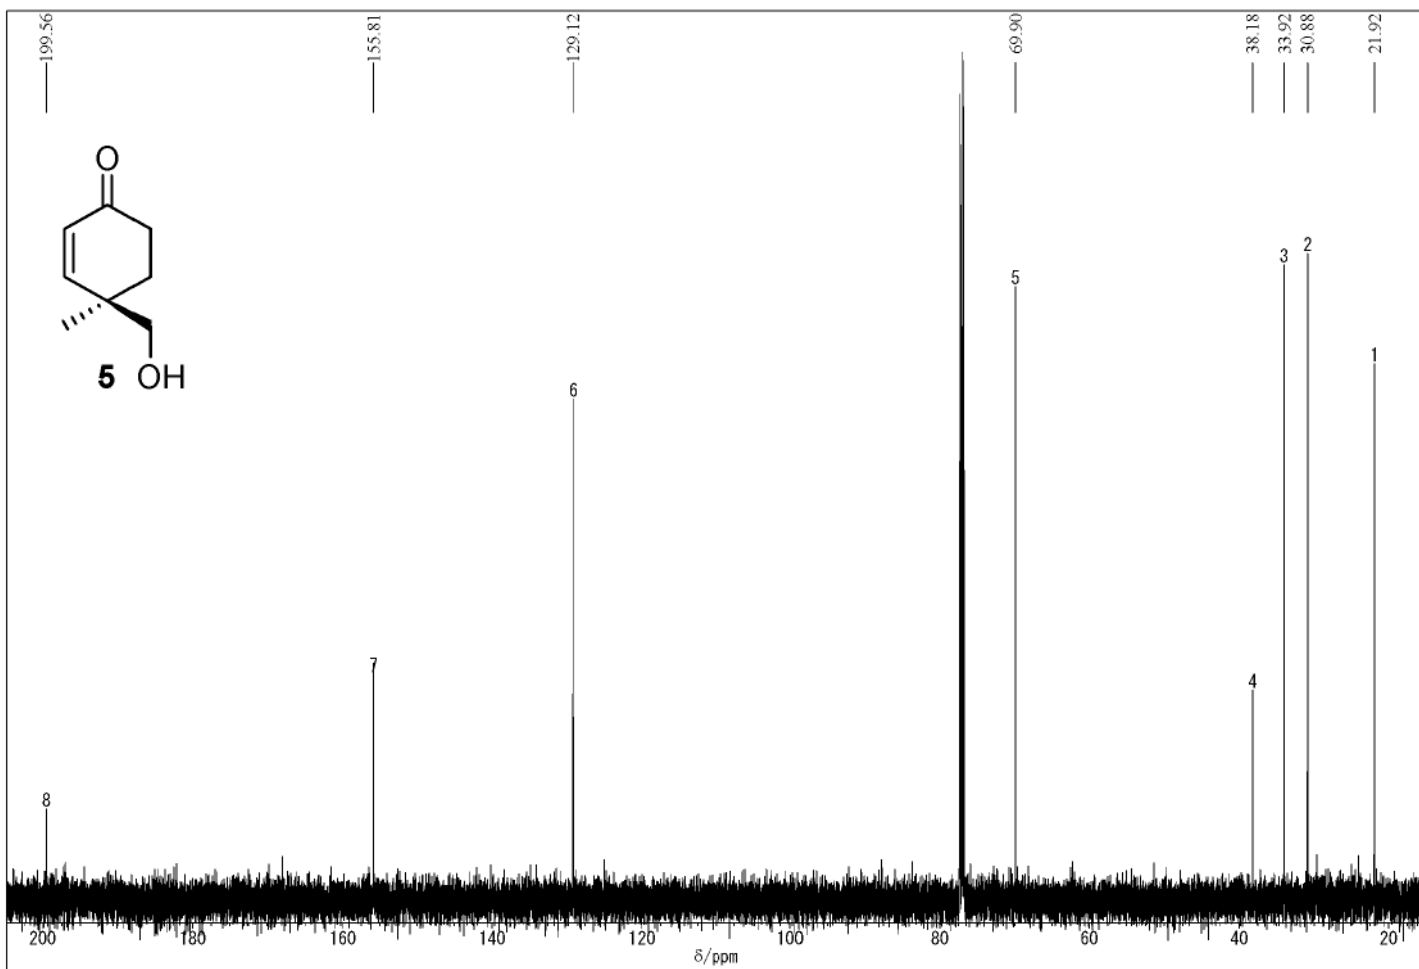

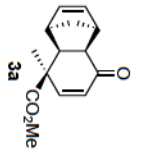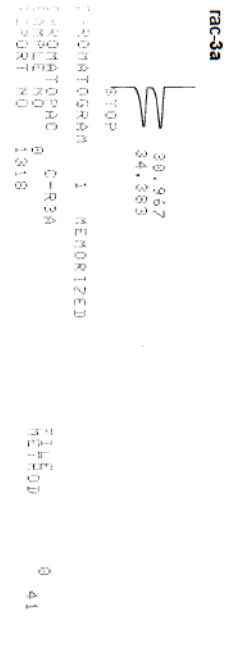

Table 1, entry 6

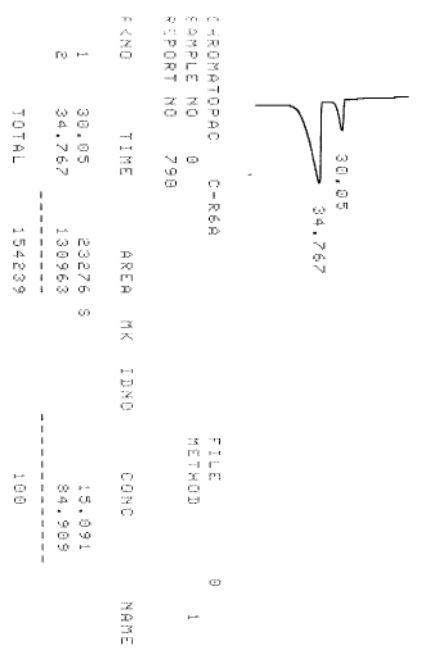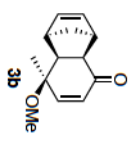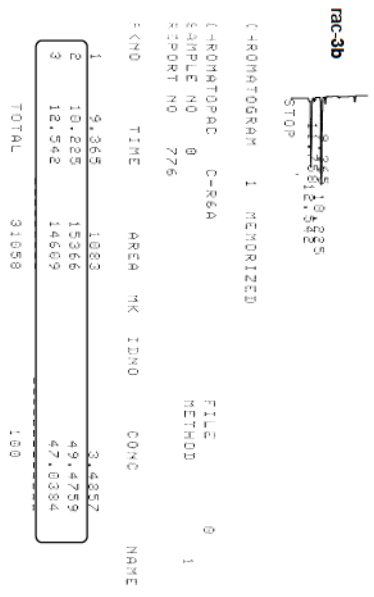

Table 3, entry 1

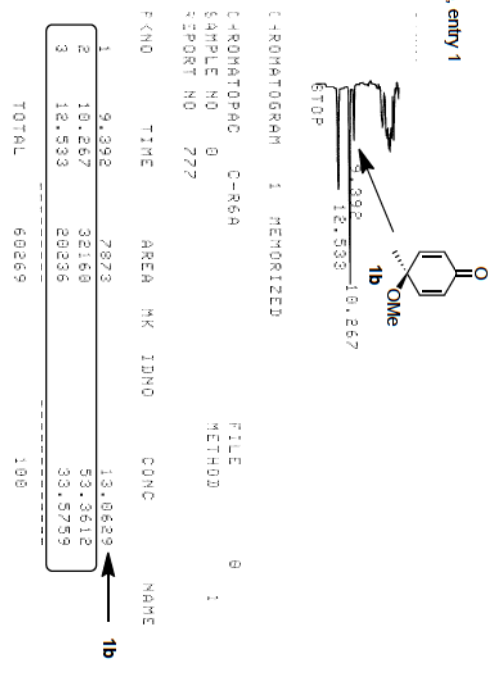

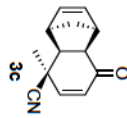

rac-3c

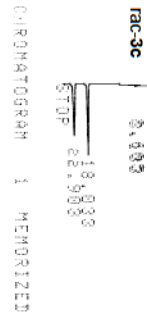

CHROMATOGRAM 1 MEMORIZED

CHROMATOPAC 0-R6A  
 SAMPLE NO 0  
 REPORT NO 6645

| RUN   | TIME   | AREA  | NK | IDNO | CONC    | NAME |
|-------|--------|-------|----|------|---------|------|
| 1     | 18.817 | 16186 |    |      | 49.6507 |      |
| 2     | 22.902 | 16416 |    |      | 50.9493 |      |
| TOTAL |        | 32599 |    |      | 100     |      |

FILE 0  
 METHOD 41

Table 3, entry 2

CHROMATOGRAM 1 MEMORIZED

CHROMATOPAC 0-R6A  
 SAMPLE NO 0  
 REPORT NO 5627

| RUN   | TIME   | AREA   | NK | IDNO | CONC    | NAME |
|-------|--------|--------|----|------|---------|------|
| 1     | 18.817 | 44550  |    |      | 43.8956 |      |
| 2     | 22.98  | 57147  |    |      | 56.1964 |      |
| TOTAL |        | 101698 |    |      | 100     |      |

FILE 2  
 METHOD 41

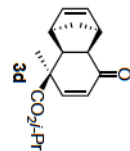

rac-3d

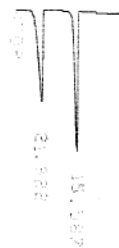

CHROMATOGRAM 1 MEMORIZED

CHROMATOPAC 0-R6A  
 SAMPLE NO 0  
 REPORT NO 8146

| RUN   | TIME   | AREA   | NK | IDNO | CONC    | NAME |
|-------|--------|--------|----|------|---------|------|
| 1     | 15.108 | 111356 |    |      | 54.1413 |      |
| 2     | 18.057 | 116478 |    |      | 49.8588 |      |
| 3     | 21.527 | 111356 |    |      | 54.1413 |      |
| TOTAL |        | 339190 |    |      | 100     |      |

FILE 0  
 METHOD 1

Table 3, entry 3

CHROMATOGRAM 1 MEMORIZED

CHROMATOPAC 0-R6A  
 SAMPLE NO 0  
 REPORT NO 779

| RUN   | TIME   | AREA  | NK | IDNO | CONC    | NAME |
|-------|--------|-------|----|------|---------|------|
| 1     | 15.108 | 5451  |    |      | 6.8503  |      |
| 2     | 18.057 | 24192 |    |      | 30.4021 |      |
| 3     | 21.527 | 49930 |    |      | 62.7476 |      |
| TOTAL |        | 79572 |    |      | 100     |      |

FILE 0  
 METHOD 1

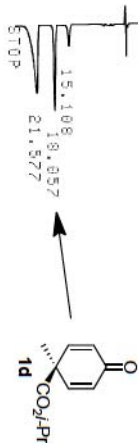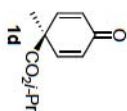

1d

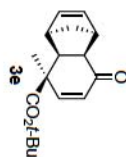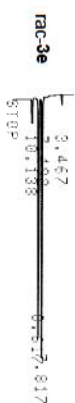

CHROMATOGRAM 1 MEMORIZED  
 CHROMATOGRAPH C-REB FILE 0  
 SAMPLE NO 0 METHOD 41  
 REPORT NO 6658

| PKNO  | TIME   | AREA  | WK | DNNO | CONC    | NAME |
|-------|--------|-------|----|------|---------|------|
| 1     | 9.447  | 1138  |    |      | 1.5445  |      |
| 2     | 7.817  | 39137 | Y  |      | 46.737  |      |
| 3     | 9.817  | 39937 |    |      | 48.4284 |      |
| 4     | 10.138 | 4078  |    |      | 5.9237  |      |
| TOTAL |        | 88645 |    |      | 100     |      |

Table 4, entry 4

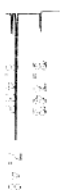

CHROMATOGRAM 1 MEMORIZED  
 CHROMATOGRAPH C-REB FILE 0  
 SAMPLE NO 0 METHOD 41  
 REPORT NO 6659

| PKNO | TIME  | AREA  | WK | DNNO | CONC     | NAME |
|------|-------|-------|----|------|----------|------|
| 1    | 9.533 | 1138  |    |      | 1.5445   |      |
| 2    | 7.245 | 1863  | Y  |      | 1.645    |      |
| 3    | 7.48  | 11916 |    |      | 25.75969 |      |
| 4    | 6.432 | 2797  |    |      | 3.17738  |      |

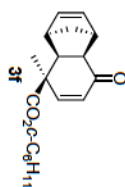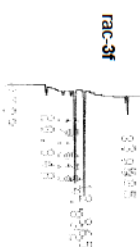

CHROMATOGRAM 1 MEMORIZED

| PKNO  | TIME   | AREA  | WK | DNNO | CONC   | NAME |
|-------|--------|-------|----|------|--------|------|
| 1     | 9.996  | 1811  |    |      | 9.6137 |      |
| 2     | 9.92   | 241   |    |      | 1.4338 |      |
| 3     | 10.965 | 18932 |    |      | 2.3111 |      |
| 4     | 10.928 | 1863  | Y  |      | 2.0299 |      |
| 5     | 12.113 | 1138  |    |      | 1.4338 |      |
| 6     | 9.918  | 333   |    |      | 4.9364 |      |
| 7     | 9.918  | 333   |    |      | 4.9364 |      |
| TOTAL |        | 44584 |    |      | 100    |      |

Table 3, entry 5

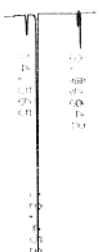

CHROMATOGRAM 1 MEMORIZED  
 CHROMATOGRAPH C-REB FILE 0  
 SAMPLE NO 0 METHOD 41  
 REPORT NO 6636

| PKNO | TIME   | AREA  | WK | DNNO | CONC    | NAME |
|------|--------|-------|----|------|---------|------|
| 1    | 9.442  | 4936  |    |      | 4.6883  |      |
| 2    | 9.963  | 1927  |    |      | 1.8363  |      |
| 3    | 10.452 | 45442 |    |      | 41.9567 |      |
| 4    | 14.555 | 447   |    |      | 4.2377  |      |

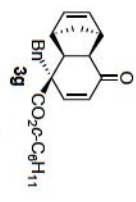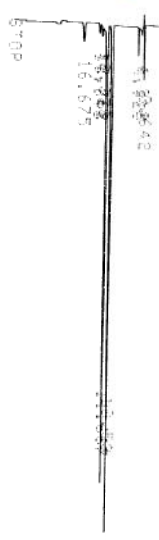

CHROMATOGRAM 1 MEMORIZED

CHROMATOPAC C-R6A FILE 0  
 SAMPLE NO 0 METHOD 41  
 REPORT NO 6749

| PKNO  | TIME   | AREA   | NK | IDNO | CONC   | NAME |
|-------|--------|--------|----|------|--------|------|
| 1     | 11.113 | 94133  | Y  |      | 44.118 |      |
| 2     | 11.113 | 94133  | Y  |      | 44.118 |      |
| 3     | 11.113 | 94133  | Y  |      | 44.118 |      |
| 4     | 11.113 | 94133  | Y  |      | 44.118 |      |
| 5     | 11.113 | 94133  | Y  |      | 44.118 |      |
| 6     | 11.113 | 94133  | Y  |      | 44.118 |      |
| 7     | 11.113 | 94133  | Y  |      | 44.118 |      |
| 8     | 11.113 | 94133  | Y  |      | 44.118 |      |
| 9     | 11.113 | 94133  | Y  |      | 44.118 |      |
| TOTAL |        | 213066 |    |      | 100    |      |

Table 4, entry 1

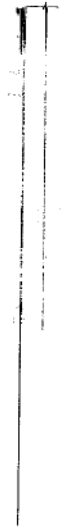

CHROMATOGRAM 1 MEMORIZED

CHROMATOPAC C-R6A FILE 0  
 SAMPLE NO 0 METHOD 41  
 REPORT NO 6749

| PKNO  | TIME   | AREA   | NK | IDNO | CONC   | NAME |
|-------|--------|--------|----|------|--------|------|
| 1     | 11.113 | 94133  | Y  |      | 44.118 |      |
| 2     | 11.113 | 94133  | Y  |      | 44.118 |      |
| 3     | 11.113 | 94133  | Y  |      | 44.118 |      |
| 4     | 11.113 | 94133  | Y  |      | 44.118 |      |
| 5     | 11.113 | 94133  | Y  |      | 44.118 |      |
| 6     | 11.113 | 94133  | Y  |      | 44.118 |      |
| 7     | 11.113 | 94133  | Y  |      | 44.118 |      |
| 8     | 11.113 | 94133  | Y  |      | 44.118 |      |
| 9     | 11.113 | 94133  | Y  |      | 44.118 |      |
| TOTAL |        | 213066 |    |      | 100    |      |

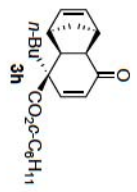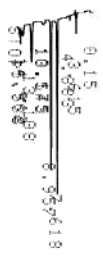

CHROMATOGRAM 1 MEMORIZED

CHROMATOPAC C-R6A FILE 0  
 SAMPLE NO 0 METHOD 41  
 REPORT NO 6749

| PKNO  | TIME  | AREA  | NK | IDNO | CONC    | NAME |
|-------|-------|-------|----|------|---------|------|
| 1     | 7.608 | 23236 | Y  |      | 36.2372 |      |
| 2     | 7.608 | 23236 | Y  |      | 36.2372 |      |
| 3     | 7.608 | 23236 | Y  |      | 36.2372 |      |
| 4     | 7.608 | 23236 | Y  |      | 36.2372 |      |
| 5     | 7.608 | 23236 | Y  |      | 36.2372 |      |
| 6     | 7.608 | 23236 | Y  |      | 36.2372 |      |
| 7     | 7.608 | 23236 | Y  |      | 36.2372 |      |
| 8     | 7.608 | 23236 | Y  |      | 36.2372 |      |
| TOTAL |       | 65192 |    |      | 100     |      |

Table 4, entry 2

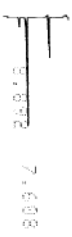

CHROMATOGRAM 1 MEMORIZED

CHROMATOPAC C-R6A FILE 0  
 SAMPLE NO 0 METHOD 41  
 REPORT NO 6749

| PKNO  | TIME  | AREA  | NK | IDNO | CONC    | NAME |
|-------|-------|-------|----|------|---------|------|
| 1     | 7.608 | 23236 | Y  |      | 36.2372 |      |
| 2     | 7.608 | 23236 | Y  |      | 36.2372 |      |
| 3     | 7.608 | 23236 | Y  |      | 36.2372 |      |
| 4     | 7.608 | 23236 | Y  |      | 36.2372 |      |
| 5     | 7.608 | 23236 | Y  |      | 36.2372 |      |
| 6     | 7.608 | 23236 | Y  |      | 36.2372 |      |
| 7     | 7.608 | 23236 | Y  |      | 36.2372 |      |
| 8     | 7.608 | 23236 | Y  |      | 36.2372 |      |
| TOTAL |       | 65192 |    |      | 100     |      |

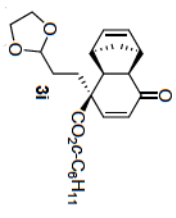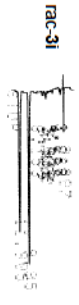

1-ROH470894M 1 MET091289 3i  
 1-ROH470894M 0-ROH  
 1-ROH470894M 0-ROH  
 1-ROH470894M 0-ROH

| PK NO | TIME  | AREA | %   | CONC  | NAME |
|-------|-------|------|-----|-------|------|
| 1     | 9.74  | 4845 | 100 | 48.45 | 3i   |
| 2     | 11.75 | 3213 | 6.6 | 3.21  |      |
| 3     | 9.74  | 4845 | 100 | 48.45 | 3i   |
| 4     | 11.75 | 3213 | 6.6 | 3.21  |      |
| 5     | 9.74  | 4845 | 100 | 48.45 | 3i   |
| 6     | 11.75 | 3213 | 6.6 | 3.21  |      |
| 7     | 9.74  | 4845 | 100 | 48.45 | 3i   |
| 8     | 11.75 | 3213 | 6.6 | 3.21  |      |
| 9     | 9.74  | 4845 | 100 | 48.45 | 3i   |
| 10    | 11.75 | 3213 | 6.6 | 3.21  |      |
| 11    | 9.74  | 4845 | 100 | 48.45 | 3i   |
| 12    | 11.75 | 3213 | 6.6 | 3.21  |      |
| 13    | 9.74  | 4845 | 100 | 48.45 | 3i   |
| 14    | 11.75 | 3213 | 6.6 | 3.21  |      |
| 15    | 9.74  | 4845 | 100 | 48.45 | 3i   |
| 16    | 11.75 | 3213 | 6.6 | 3.21  |      |
| 17    | 9.74  | 4845 | 100 | 48.45 | 3i   |
| 18    | 11.75 | 3213 | 6.6 | 3.21  |      |
| 19    | 9.74  | 4845 | 100 | 48.45 | 3i   |
| 20    | 11.75 | 3213 | 6.6 | 3.21  |      |
| 21    | 9.74  | 4845 | 100 | 48.45 | 3i   |
| 22    | 11.75 | 3213 | 6.6 | 3.21  |      |
| 23    | 9.74  | 4845 | 100 | 48.45 | 3i   |
| 24    | 11.75 | 3213 | 6.6 | 3.21  |      |
| 25    | 9.74  | 4845 | 100 | 48.45 | 3i   |
| 26    | 11.75 | 3213 | 6.6 | 3.21  |      |
| 27    | 9.74  | 4845 | 100 | 48.45 | 3i   |
| 28    | 11.75 | 3213 | 6.6 | 3.21  |      |
| 29    | 9.74  | 4845 | 100 | 48.45 | 3i   |
| 30    | 11.75 | 3213 | 6.6 | 3.21  |      |
| 31    | 9.74  | 4845 | 100 | 48.45 | 3i   |
| 32    | 11.75 | 3213 | 6.6 | 3.21  |      |
| 33    | 9.74  | 4845 | 100 | 48.45 | 3i   |
| 34    | 11.75 | 3213 | 6.6 | 3.21  |      |
| 35    | 9.74  | 4845 | 100 | 48.45 | 3i   |
| 36    | 11.75 | 3213 | 6.6 | 3.21  |      |
| 37    | 9.74  | 4845 | 100 | 48.45 | 3i   |
| 38    | 11.75 | 3213 | 6.6 | 3.21  |      |
| 39    | 9.74  | 4845 | 100 | 48.45 | 3i   |
| 40    | 11.75 | 3213 | 6.6 | 3.21  |      |
| 41    | 9.74  | 4845 | 100 | 48.45 | 3i   |
| 42    | 11.75 | 3213 | 6.6 | 3.21  |      |
| 43    | 9.74  | 4845 | 100 | 48.45 | 3i   |
| 44    | 11.75 | 3213 | 6.6 | 3.21  |      |
| 45    | 9.74  | 4845 | 100 | 48.45 | 3i   |
| 46    | 11.75 | 3213 | 6.6 | 3.21  |      |
| 47    | 9.74  | 4845 | 100 | 48.45 | 3i   |
| 48    | 11.75 | 3213 | 6.6 | 3.21  |      |
| 49    | 9.74  | 4845 | 100 | 48.45 | 3i   |
| 50    | 11.75 | 3213 | 6.6 | 3.21  |      |

Table 4, entry 3

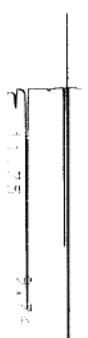

CHROMATOGRAM 1 MEMORIZED  
 CHROMATOPAC C-R6A  
 SAMPLE NO 0  
 REPORT NO 6762  
 FILE 0  
 METHOD 41  
 NAME  
 PK NO TIME AREA MK IDNO CONC  
 1 9.74 4845 48.45  
 2 11.75 3213 3.21
